# Supplementary material for: Dynamic evolution of satellite DNAs drastically differentiates the genomes of Tribolium sibling species
Source: HighWire-hosted journal article supplement (doi:10.1101/gr.280516.125), 2025-09-16
Supplement: Supplemental_Data.zip [file Suppl Data S1 description.docx]

**Supplemental Data S1.** Alignments of inversion segments in which *TfSat01* monomers change their orientation within the *TfSat01* arrays. Shown are the alignments for the six most common segments (26 bp, 106 bp, 132 bp, 149 bp, 187 bp and 200 bp long). The names of the aligned sequences indicate the *T. freemani* fLG chromosome (beginning of the name) and the position on the chromosome (end of the name) on which the sequence is located.
