# Supplementary material for: Dynamic evolution of satellite DNAs drastically differentiates the genomes of Tribolium sibling species
Source: HighWire-hosted journal article supplement (doi:10.1101/gr.280516.125), 2025-09-16
Supplement: Supplemental_Data.zip [file Suppl Data S2 description.docx]

**Supplemental Data S2.** The alignment of 1577 sequences of the ~110 bp long central region of intercalary segments in which *TfSat03* monomers change orientation. The names of the aligned sequences indicate the *T. freemani* fLG chromosome (beginning of the name) and the position on the chromosome (end of the name) on which the sequence is located.
