# Supplementary material for: Dynamic evolution of satellite DNAs drastically differentiates the genomes of Tribolium sibling species
Source: HighWire-hosted journal article supplement (doi:10.1101/gr.280516.125), 2025-09-16
Supplement: Supplemental_Data.zip [file Suppl Data S3 description.docx]

**Supplemental Data S3.** Interactivegraph network of ~110 bp long central regions from 1577 intercalary segments in which *TfSat03* monomers change orientation. The graph illustrates the sequence similarity relationships based on the alignment presented in Supplemental Data S2. Each dot represents a sequence, and the color of a dot indicates the *T. freemani* fLG chromosome on which a sequence is located. The color legend indicates individual chromosomes. The position of the sequence on the chromosome is revealed by touching a dot with a mouse pointer. The relationships between the individual sequences within the network can be examined by zooming in/out.
