# Supplementary material for: Dynamic evolution of satellite DNAs drastically differentiates the genomes of Tribolium sibling species
Source: HighWire-hosted journal article supplement (doi:10.1101/gr.280516.125), 2025-09-16
Supplement: Supplemental_Data.zip [file Suppl Data S4 description.docx]

**Supplemental Data S4.** Alignments of *T. freemani* satDNAs (TfSat) monomers annotated in the *T. freemani* Tfree1.0 genome assembly and their orthologous copies annotated in the *T. castaneum* TcasONT assembly. For each annotated monomeric repeat, the beginning of the name (Tfree/Tcas) indicates the species in whose assembly the repeat is annotated. The designations fLG and LG in the names of the repeats indicate the chromosome and the position at which the repeat is annotated (fLG for *T. freemani* chromosomes, LG for *T. castaneum* chromosomes).
