# Supplementary material for: Dynamic evolution of satellite DNAs drastically differentiates the genomes of Tribolium sibling species
Source: HighWire-hosted journal article supplement (doi:10.1101/gr.280516.125), 2025-09-16
Supplement: Supplemental_Data.zip [file Suppl Data S5 description.docx]

**Supplemental Data S5.** Principal component analyses (PCAs) of aligned *T. freemani* satDNAs (TfSat) repeats annotated in the *T. freemani* Tfree1.0 genome assembly and their orthologous copies annotated in the *T. castaneum* TcasONT assembly. The PCA plots are based on the alignments presented in Supplemental Data S4. The dots represent monomer repeats colored according to the species of origin (*T. freemani* in blue, *T. castaneum* in red). By moving the mouse pointer over a dot, the chromosomal location of the annotated monomer is displayed indicating a chromosome (fLG for *T. freemani*, LG for *T. castaneum*) and a repeat position on a chromosome.
