# Supplementary material for: Dynamic evolution of satellite DNAs drastically differentiates the genomes of Tribolium sibling species
Source: HighWire-hosted journal article supplement (doi:10.1101/gr.280516.125), 2025-09-16
Supplement: Supplemental_Data.zip [file Suppl Data S6 description.docx]

**Supplemental Data S6.** Annotations of *T. freemani* stDNA monomers and arrays annotated in the *T. freemani* genome assembly Tfree1.0.
