# Supplementary material for: Dynamic evolution of satellite DNAs drastically differentiates the genomes of Tribolium sibling species
Source: HighWire-hosted journal article supplement (doi:10.1101/gr.280516.125), 2025-09-16
Supplement: Supplemental_Figures.zip [file Supplemental_Fig_S1.pdf › Supplemental_Figures/Supplemental_Figures/Supplemental_Fig_S1.pdf]

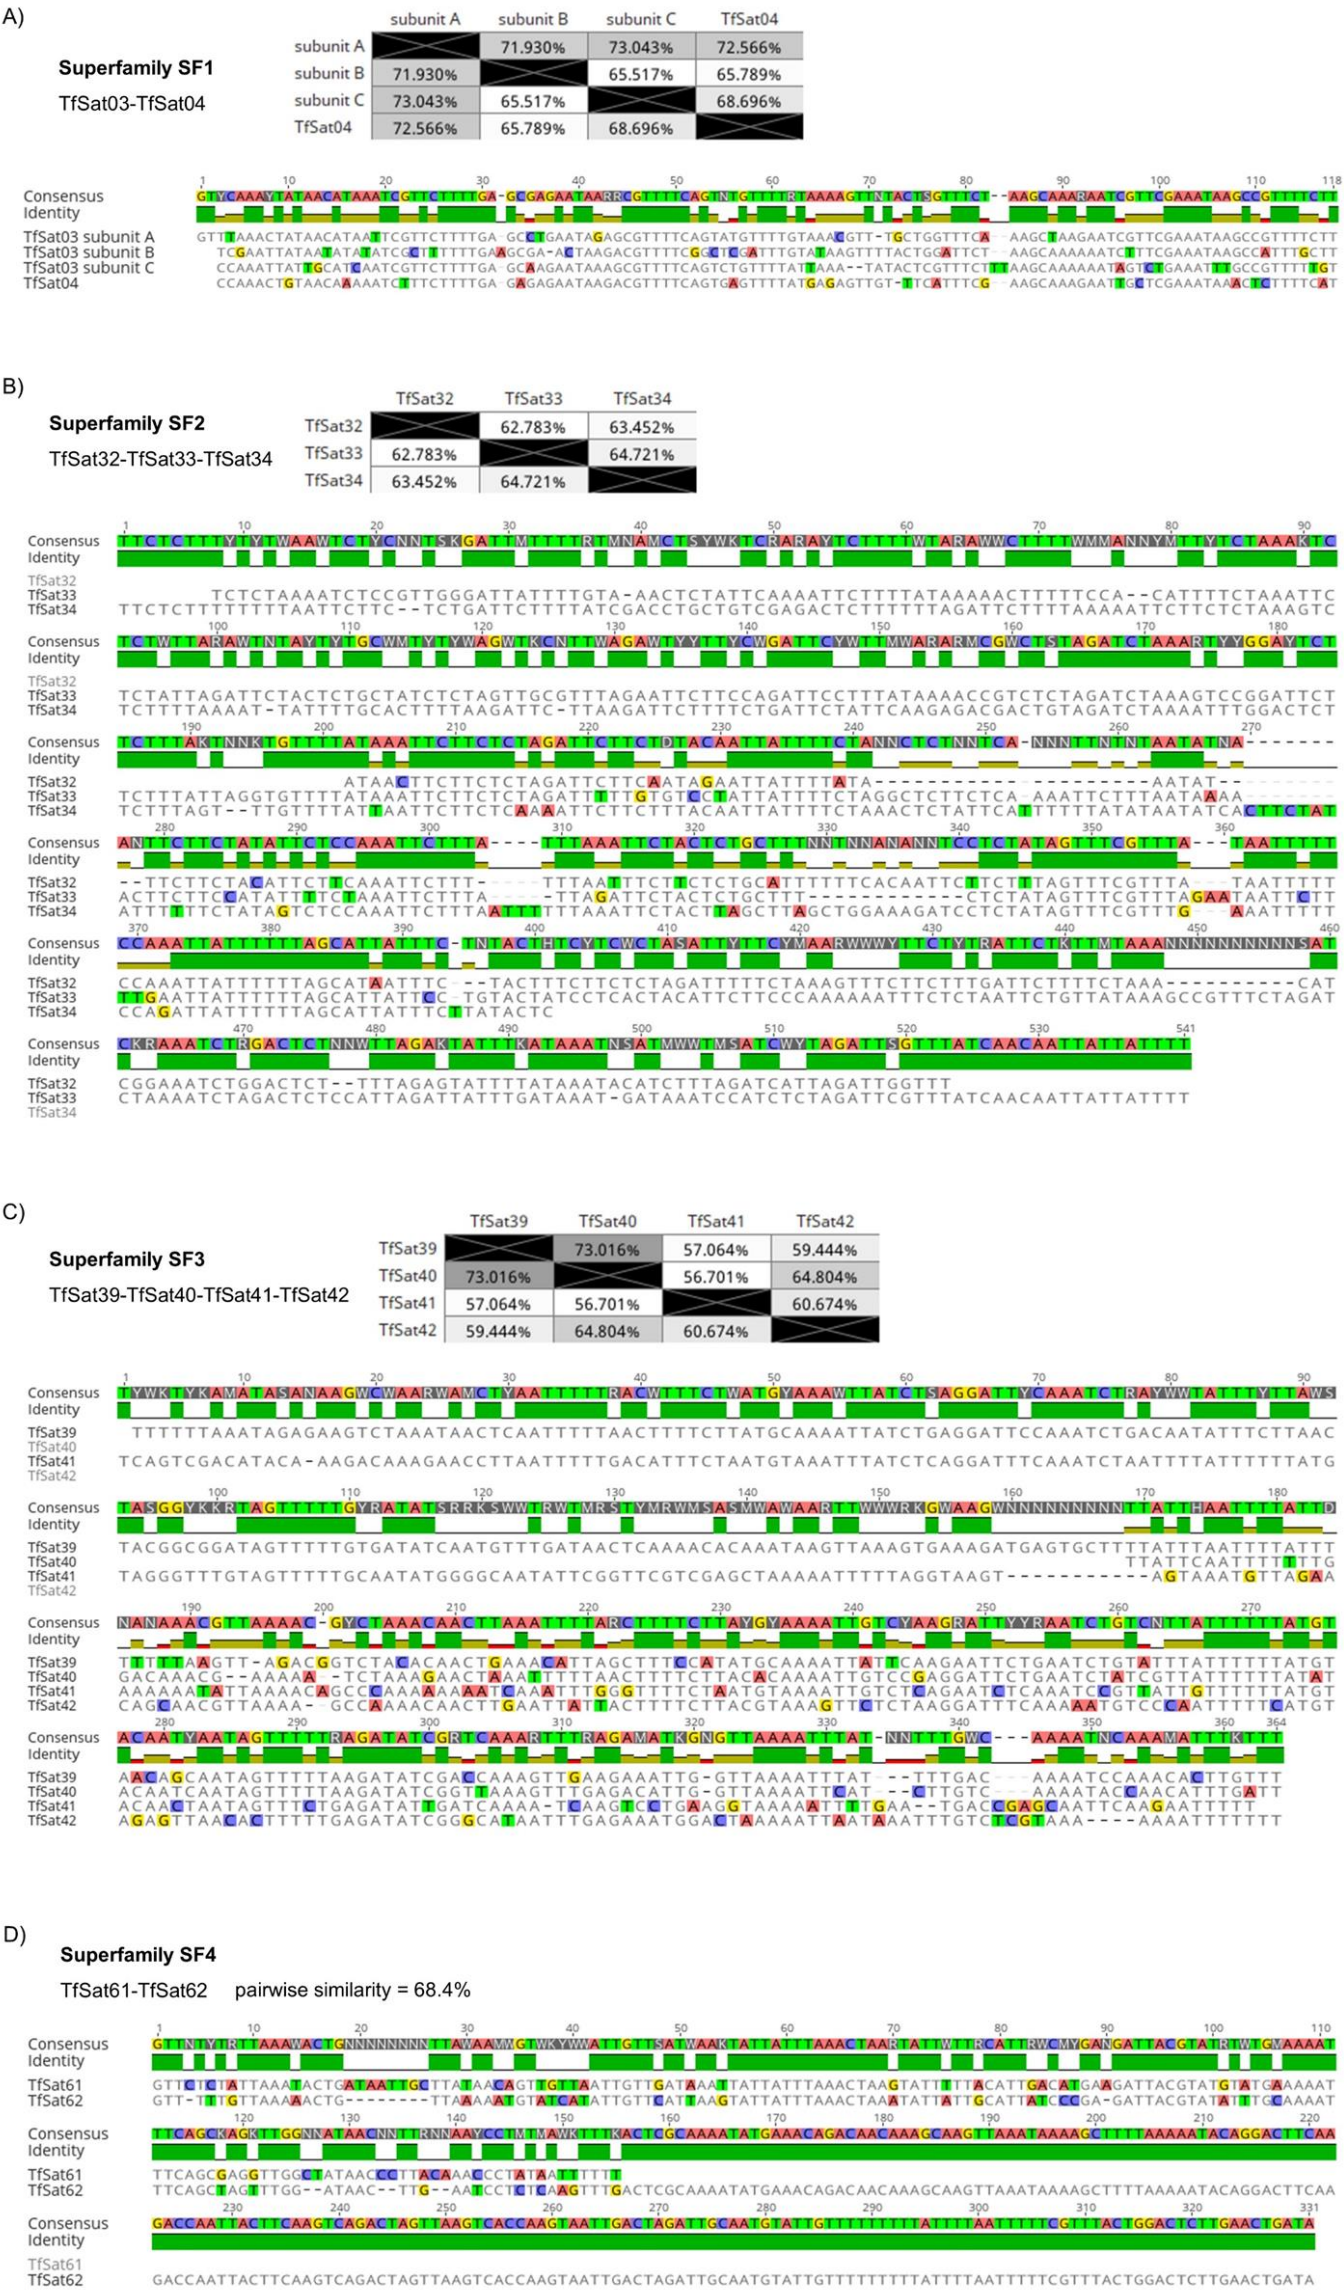

**Supplemental Figure S1.** Consensus sequence alignments of satDNAs belonging to four superfamilies (SF1-SF4). The attached matrices show the percentage of pairwise identity between the compared sequences. For the superfamily SF1 (A), the comparison between the satellite *TfSat04* and the three subunits belonging to the satDNA *TfSat03* is presented.
