# Supplementary material for: Dynamic evolution of satellite DNAs drastically differentiates the genomes of Tribolium sibling species
Source: HighWire-hosted journal article supplement (doi:10.1101/gr.280516.125), 2025-09-16
Supplement: Supplemental_Figures.zip [file Supplemental_Fig_S2.pdf › Supplemental_Figures/Supplemental_Figures/Supplemental_Fig_S2.pdf]

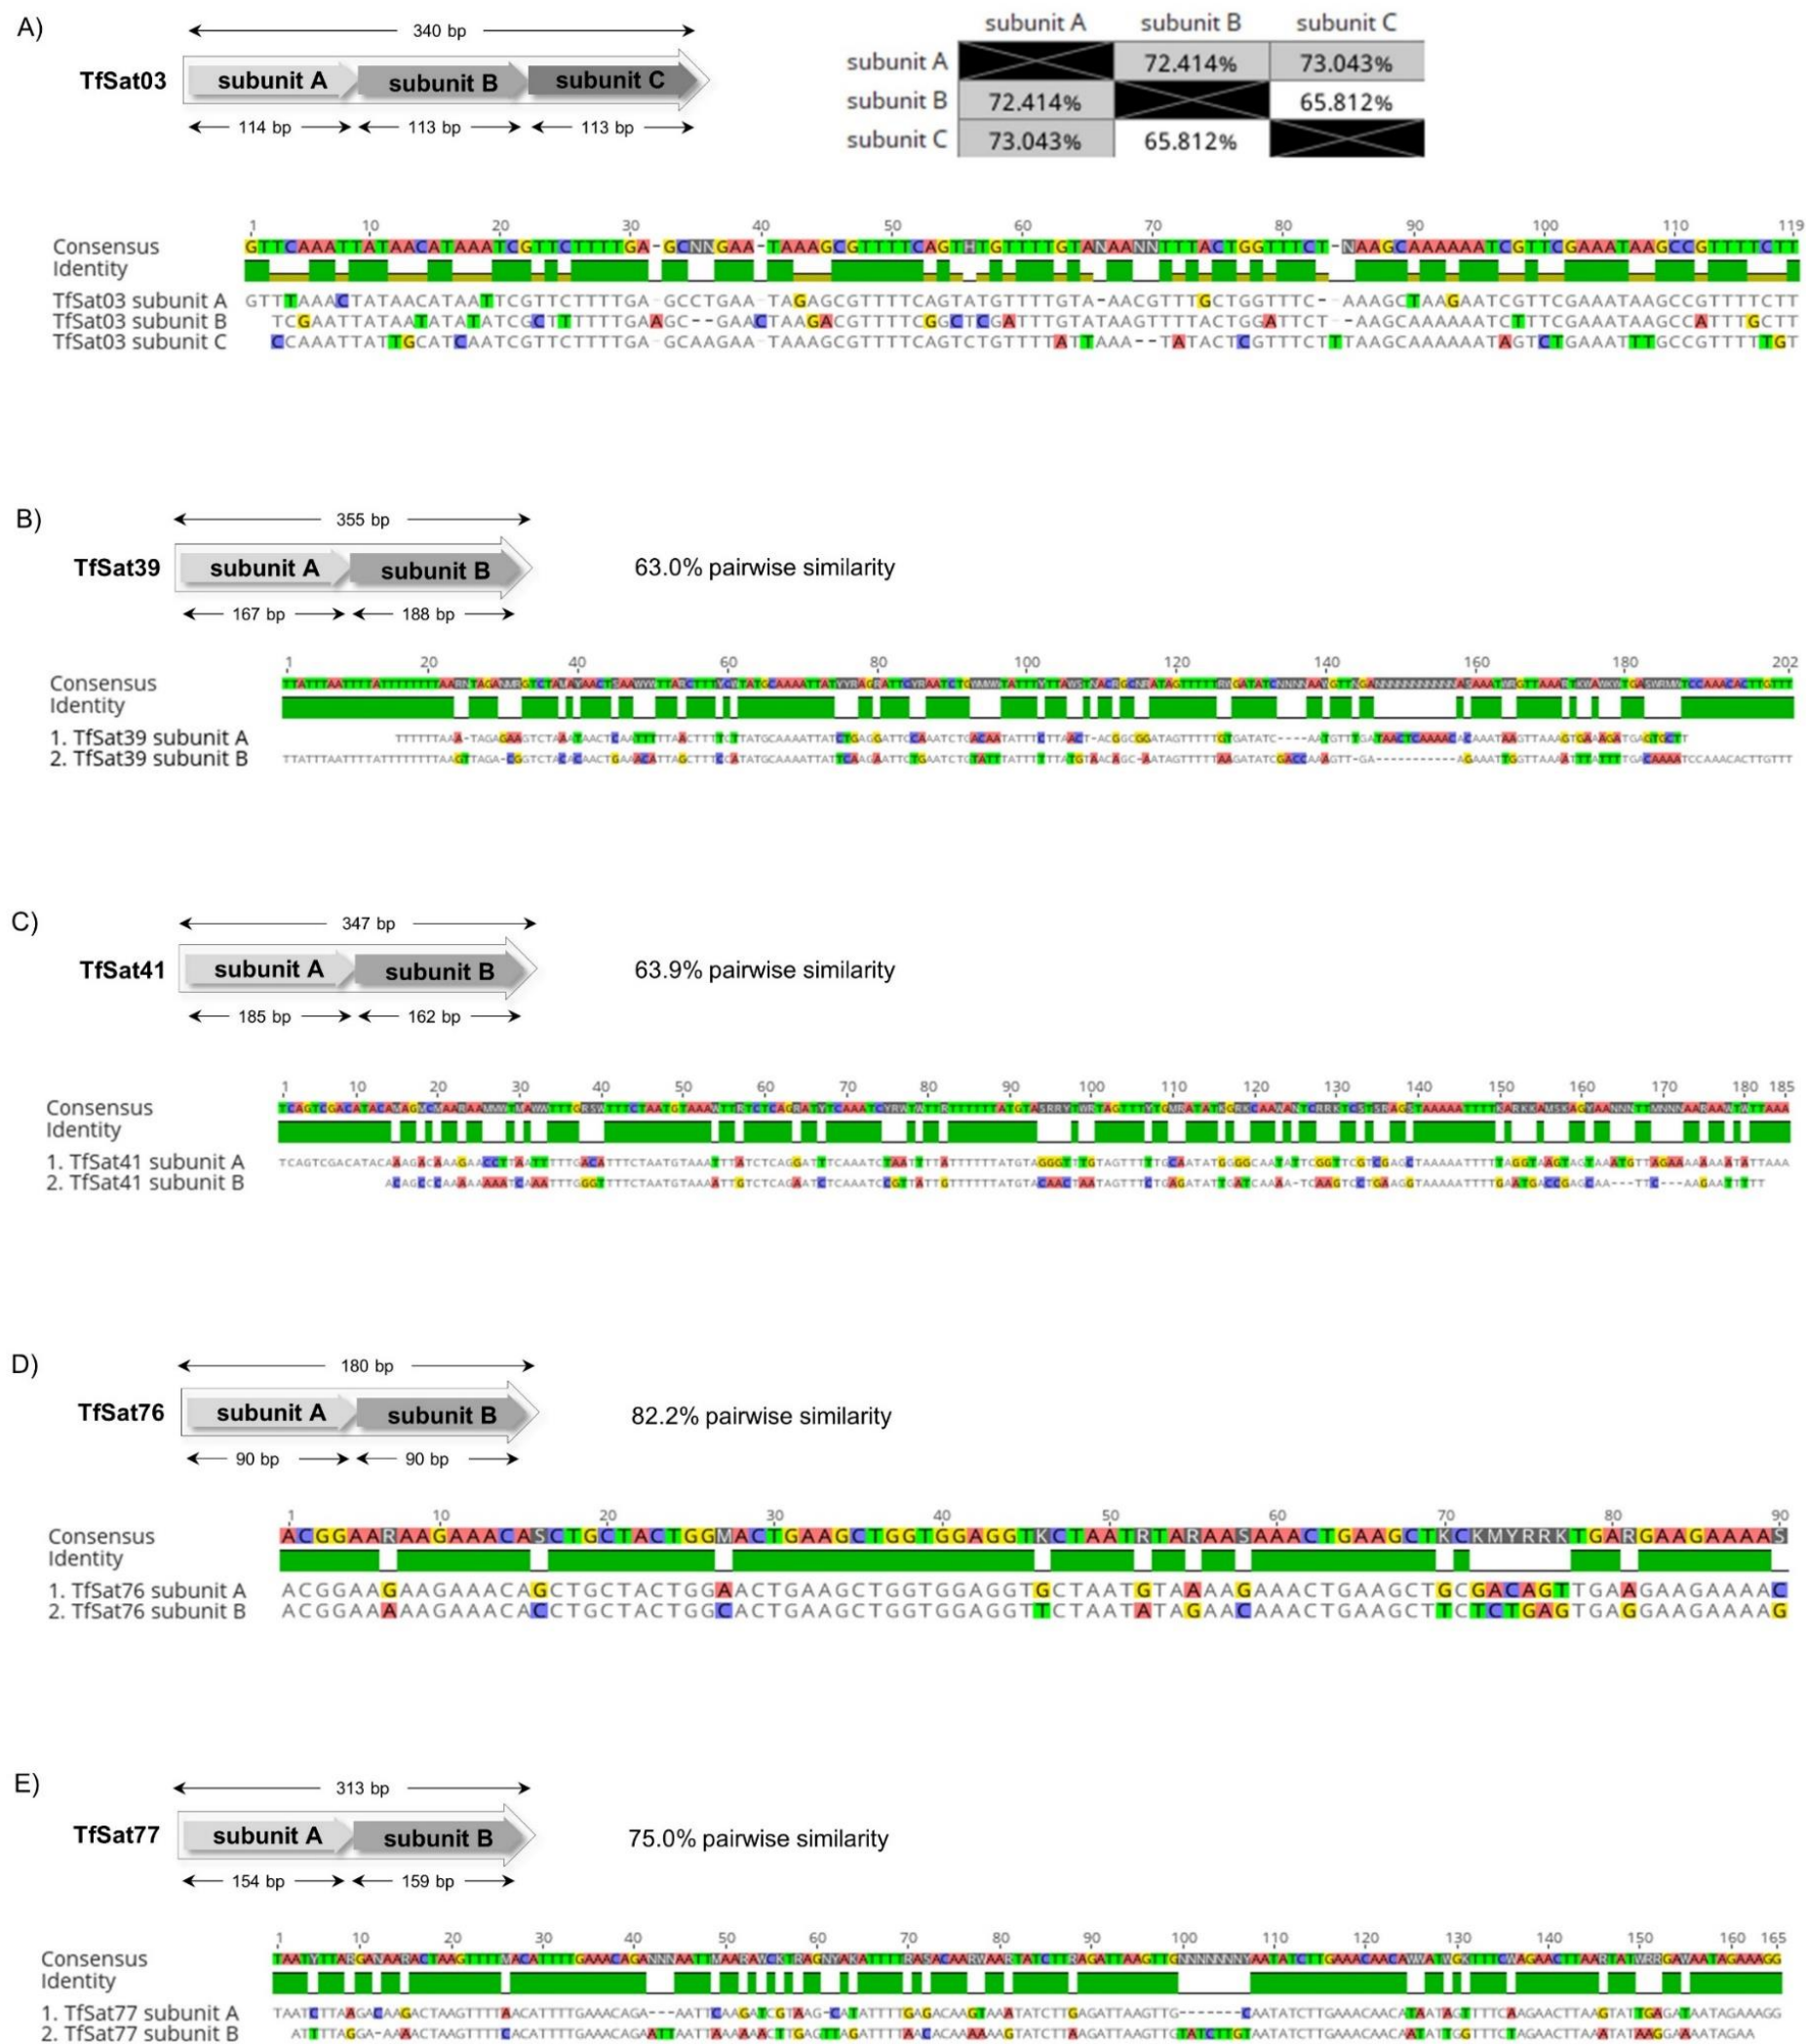

**Supplemental Figure S2.** Alignments of the subunits of satDNA *TfSat03* (A), *TfSat39* (B), *TfSat41* (C), *TfSat76* (D), and *TfSat77* (E), whose monomers are based on higher-order-repeats (HORs). Schematic representations show the HOR structure, the lengths of the subunits and their pairwise similarities.
