# Supplementary material for: Dynamic evolution of satellite DNAs drastically differentiates the genomes of Tribolium sibling species
Source: HighWire-hosted journal article supplement (doi:10.1101/gr.280516.125), 2025-09-16
Supplement: Supplemental_Figures.zip [file Supplemental_Fig_S4.pdf › Supplemental_Figures/Supplemental_Figures/Supplemental_Fig_S4.pdf]

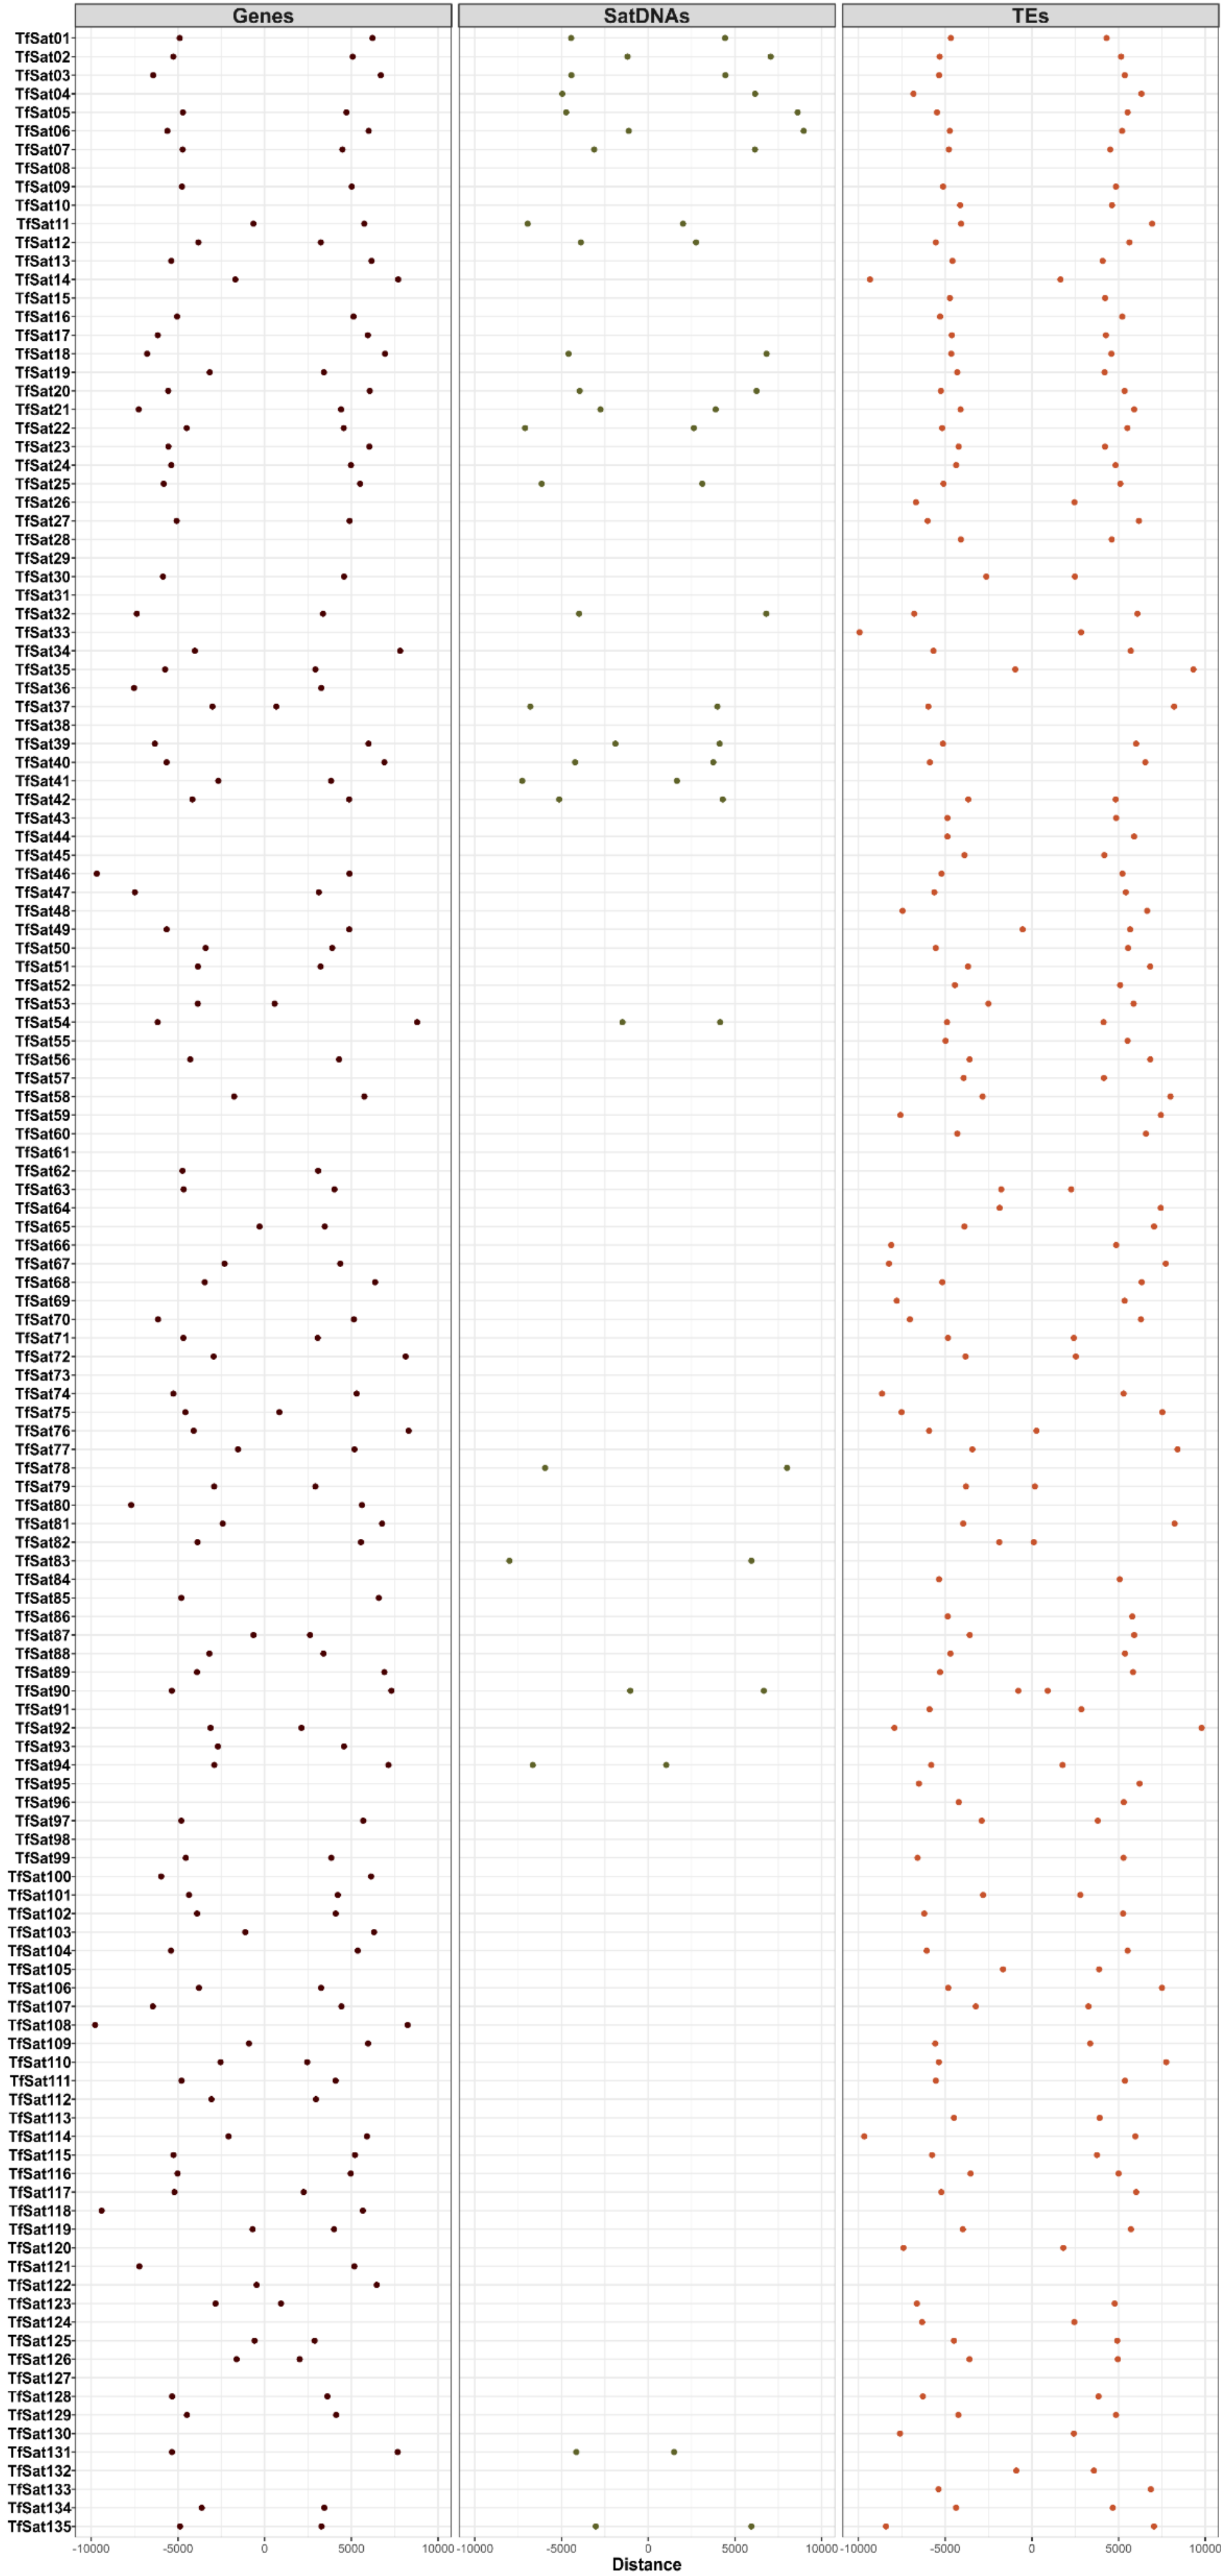

**Supplemental Figure S4.** Distances of genes, satellite DNAs (satDNAs) and transposable elements (TEs) to *T. freemani* satDNAs arrays (containing ≥5 consecutive monomers) in their 10-kb flanking regions. Each dot represents the mean distance of annotated sequences of interest for each satDNA. The x-axis indicates the mean position value in the 10-kb flanking region, with negative and positive values indicating the left and right flanking regions, respectively. The mean distance values were calculated based on the data provided for individual arrays in Supplemental Table S5.
