# Supplementary material for: Dynamic evolution of satellite DNAs drastically differentiates the genomes of Tribolium sibling species
Source: HighWire-hosted journal article supplement (doi:10.1101/gr.280516.125), 2025-09-16
Supplement: Supplemental_Figures.zip [file Supplemental_Fig_S6.pdf › Supplemental_Figures/Supplemental_Figures/Supplemental_Fig_S6.pdf]

**fLG2**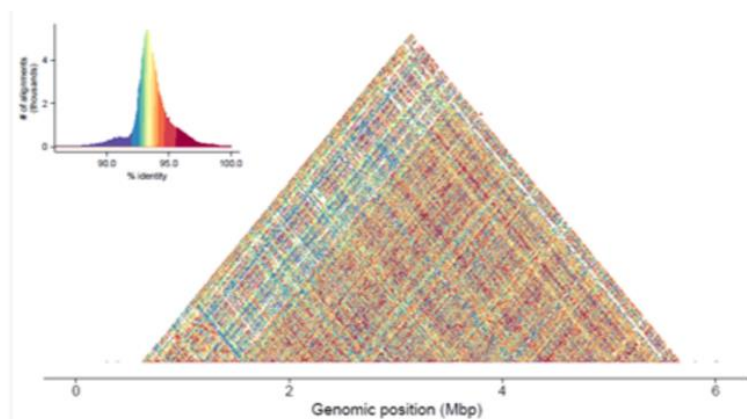**fLG3**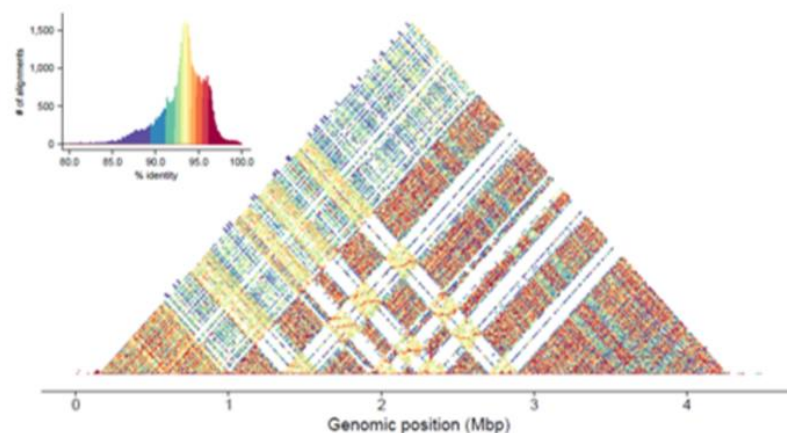**fLG5**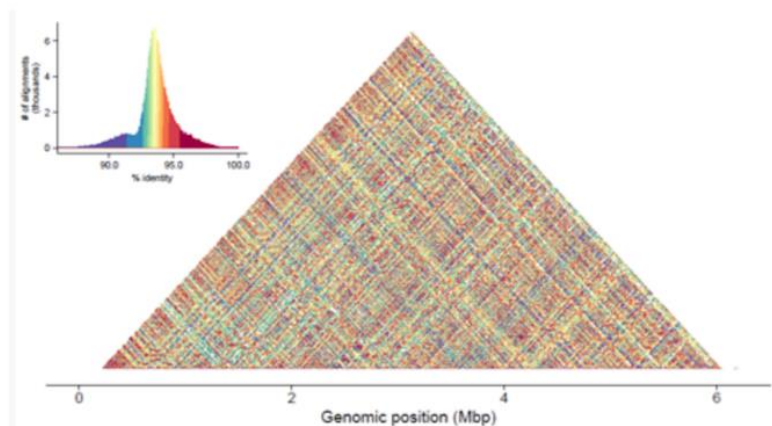**fLG6**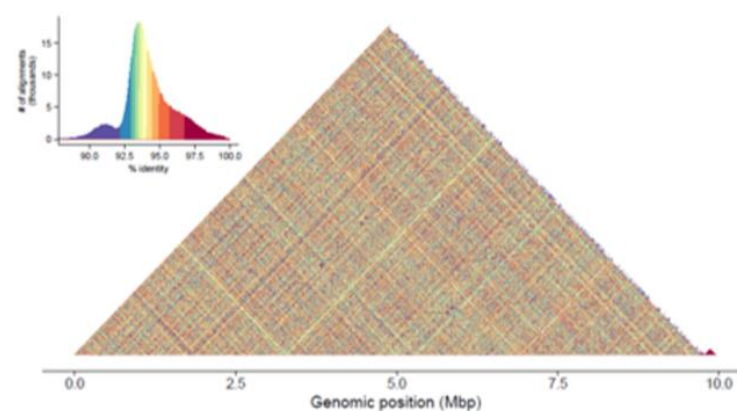**fLG7**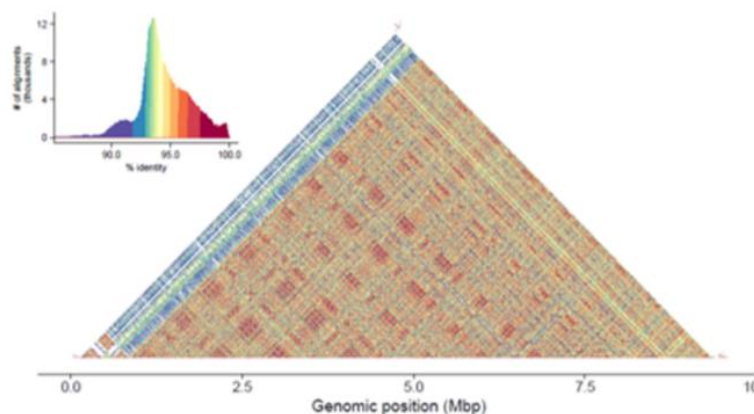**fLG8**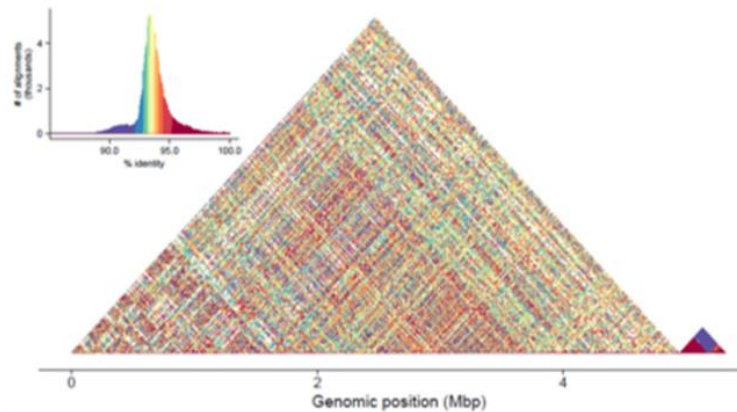**fLG9 - region 1**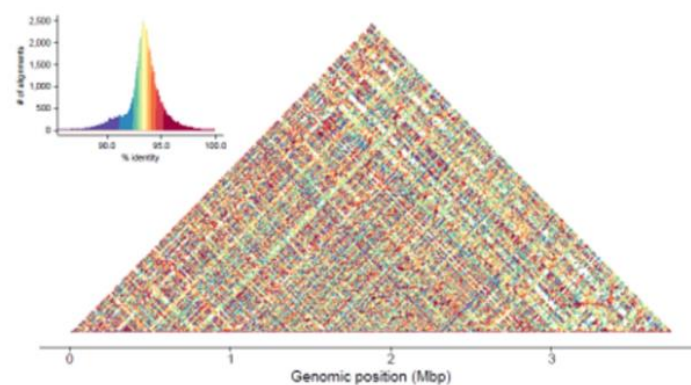**fLG9 - region 2**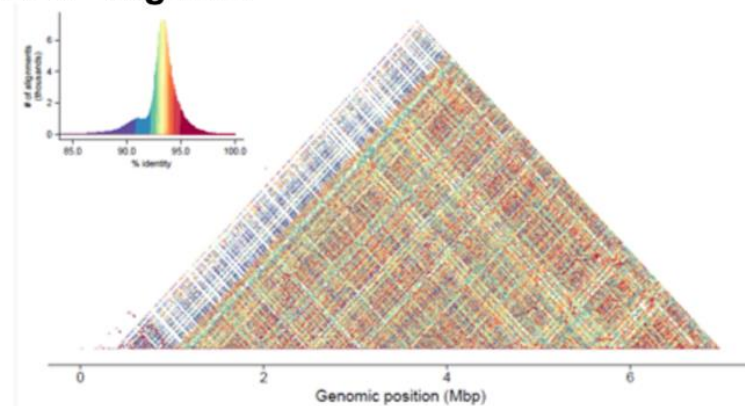

**Supplemental Figure S6.** *TfSat01* multi-megabase regions in the Tfree1.0 assembly visualized with StainedGlass (Vollger et al. 2022). The StainedGlass analysis was performed using 10 kb windows, and the sequence identity values are shown in the color histogram along each sequence identity heatmap. Two discovered multi-megabase regions (region 1 and region 2) are shown for Chromosome fLG9. The lengths and positions of the multi-megabase regions are listed in Supplemental Table S8.
