# Supplementary material for: Dynamic evolution of satellite DNAs drastically differentiates the genomes of Tribolium sibling species
Source: HighWire-hosted journal article supplement (doi:10.1101/gr.280516.125), 2025-09-16
Supplement: Supplemental_Figures.zip [file Supplemental_Fig_S8.pdf › Supplemental_Figures/Supplemental_Figures/Supplemental_Fig_S8.pdf]

**A)**

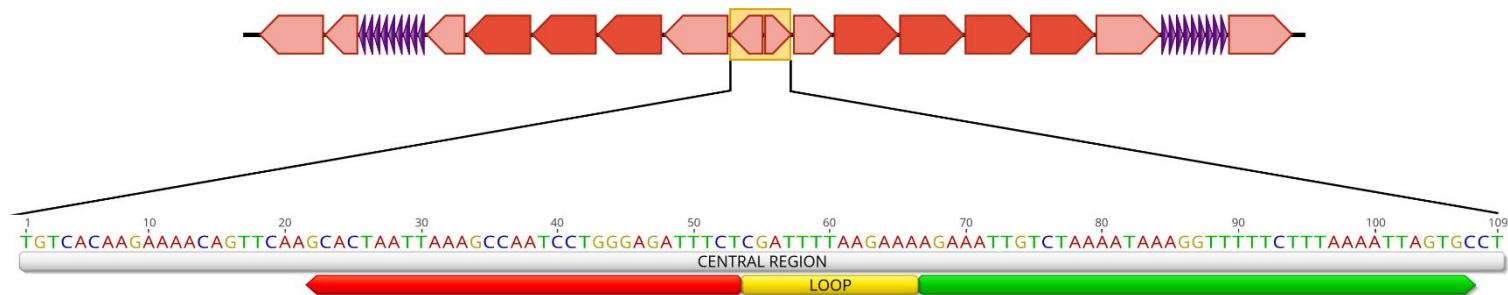

**B)**

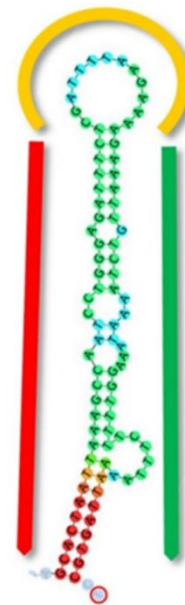

**Supplemental Figure S8.** The sequence of the central region in the intercalary segment where the degenerate *TfSat03* copies change orientation. **A)** Schematic representation of the central region with the inverted segments marked by red and green arrows. **B)** Potential secondary structure of the central region predicted by the RNAfold tool (Lorenz et al. 2011) using DNA Matthews 1999 energy model (the minimum free energy of the structures = - 6.06 kcal/mol).
