# Supplementary material for: Dynamic evolution of satellite DNAs drastically differentiates the genomes of Tribolium sibling species
Source: HighWire-hosted journal article supplement (doi:10.1101/gr.280516.125), 2025-09-16
Supplement: Supplemental_Figures.zip [file Supplemental_Fig_S10.pdf › Supplemental_Figures/Supplemental_Figures/Supplemental_Fig_S10.pdf]

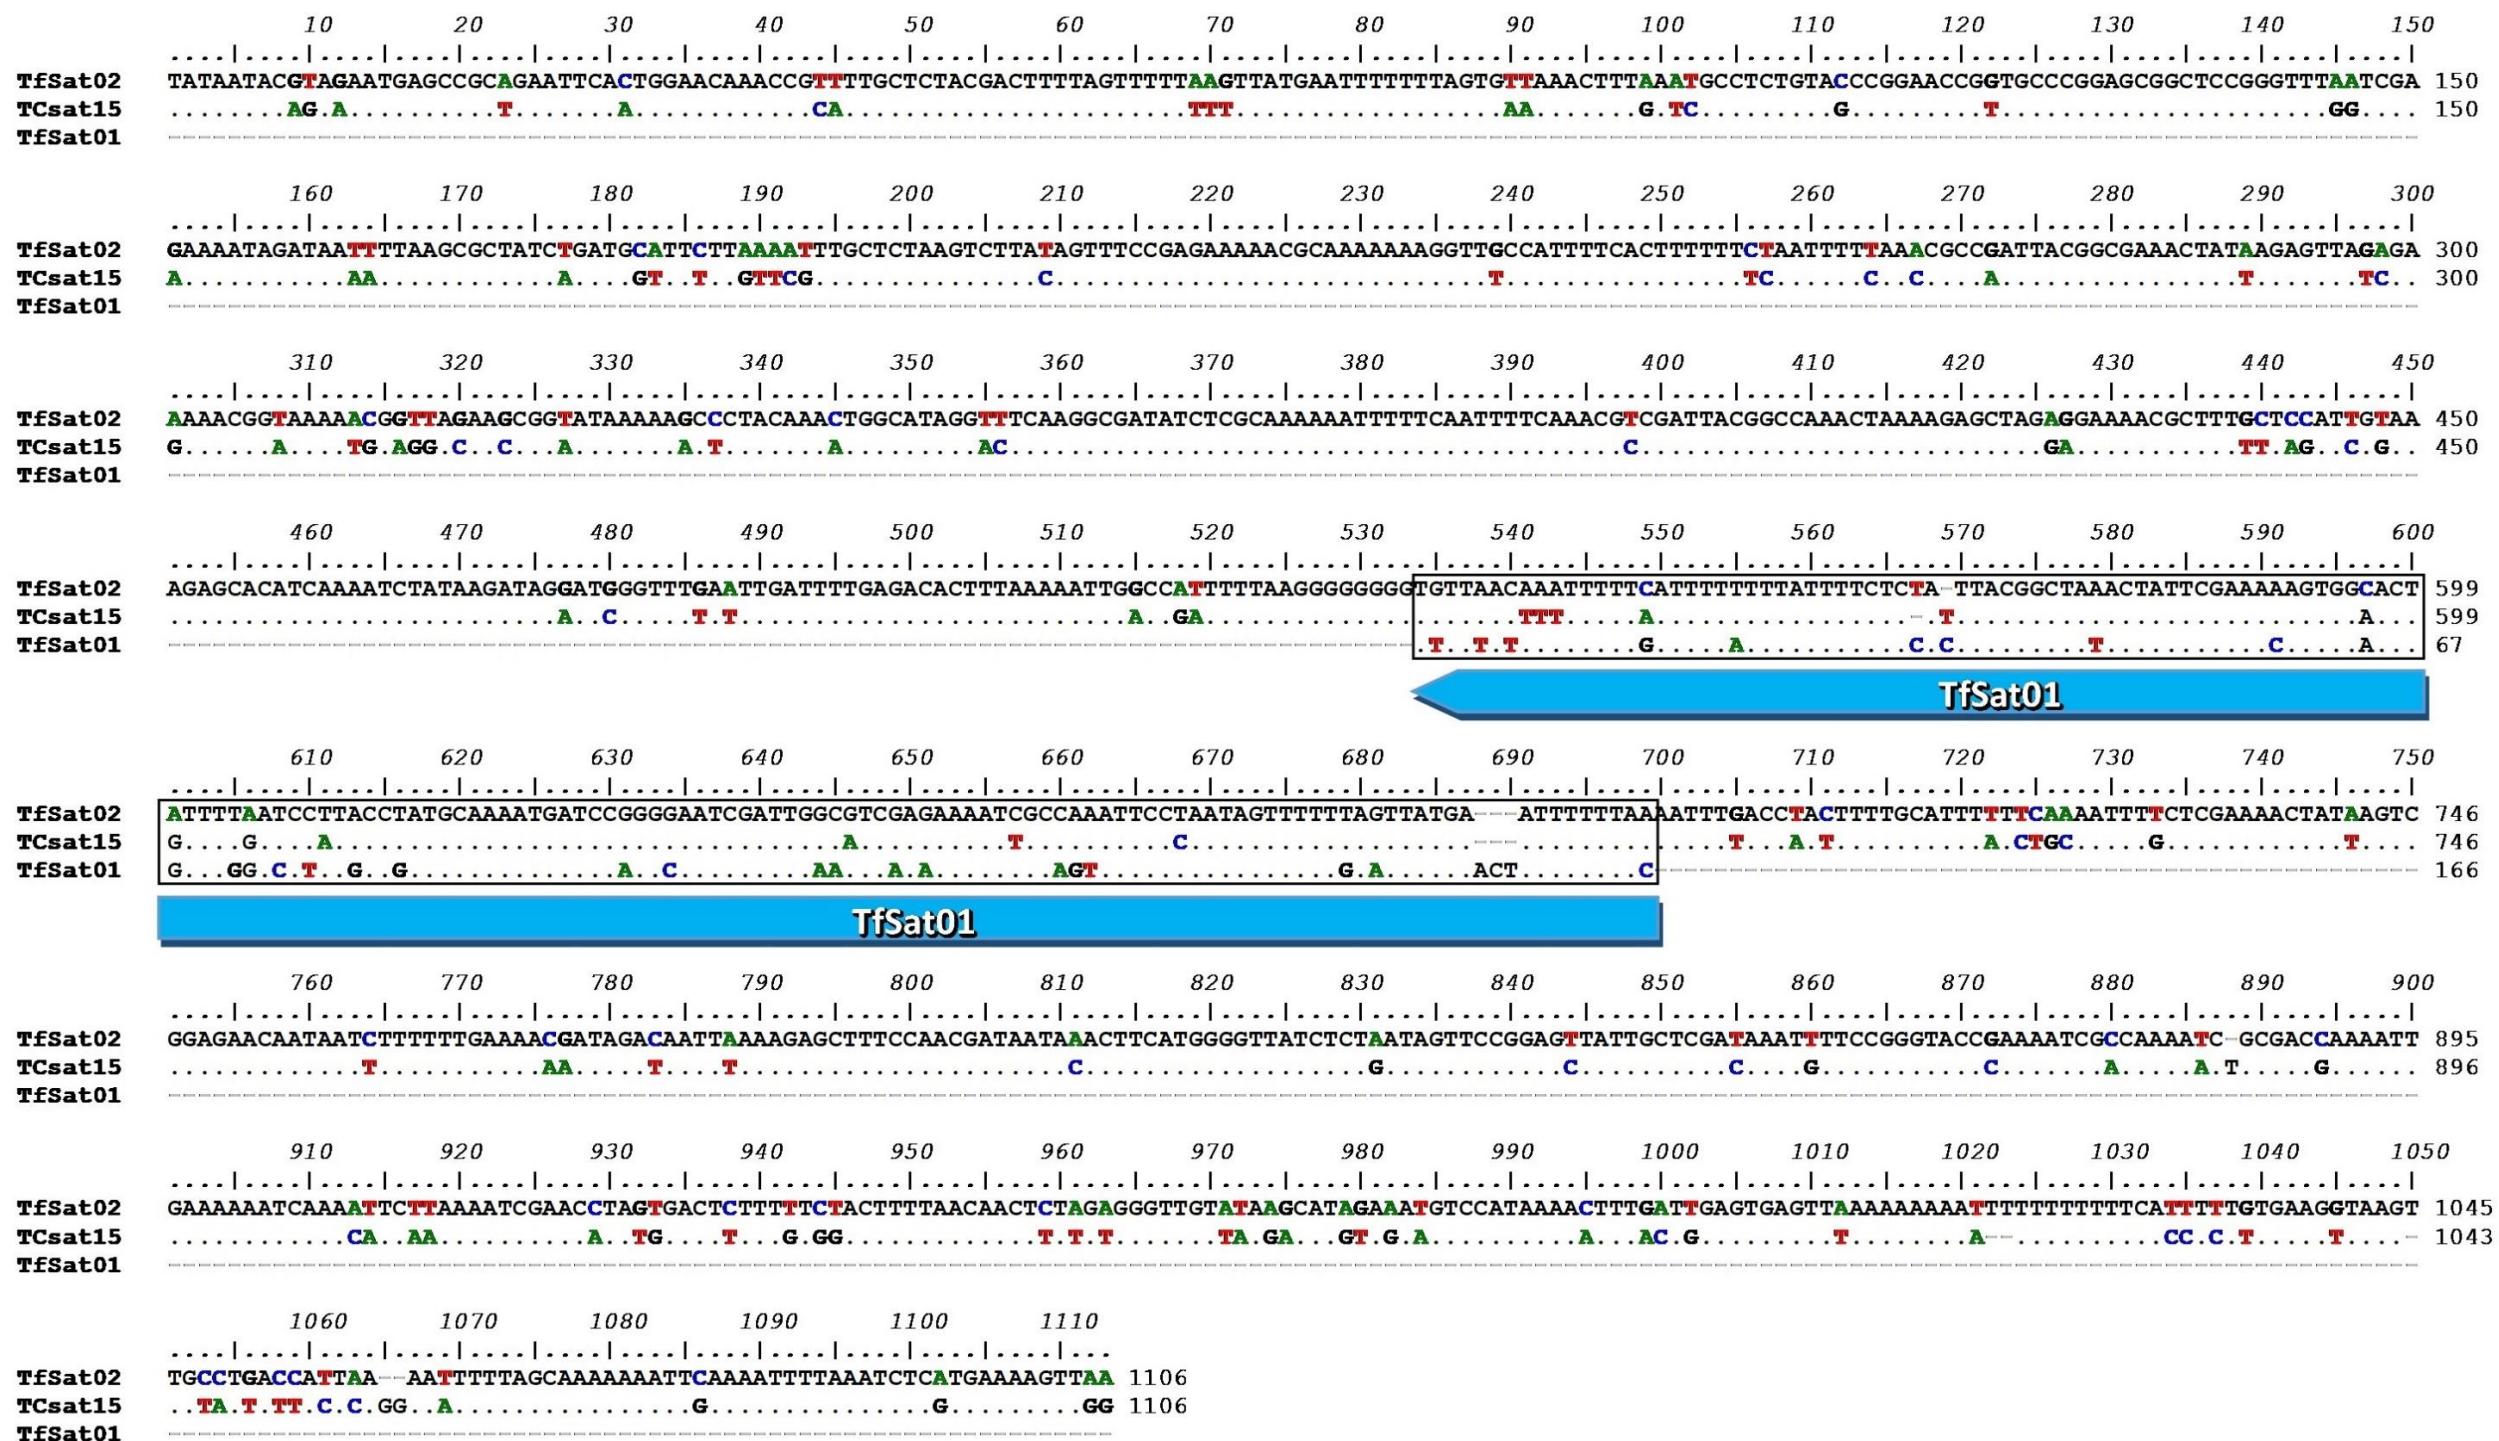

**Supplemental Figure S10.** The alignment between *TfSat01*, *TfSat02* and *TCsat15* consensus sequences. Identities between the compared sequences are indicated by dots (.), and dashes (-) indicate alignment gaps. The box indicates the 166 bp segment within the *TfSat02* and *TCsat15* consensus that corresponds to the *TfSat01* sequence. The blue arrow shows the position and orientation of the *TfSat01* sequence.
