# Supplementary material for: Dynamic evolution of satellite DNAs drastically differentiates the genomes of Tribolium sibling species
Source: HighWire-hosted journal article supplement (doi:10.1101/gr.280516.125), 2025-09-16
Supplement: Supplemental_Figures.zip [file Supplemental_Fig_S11.pdf › Supplemental_Figures/Supplemental_Figures/Supplemental_Fig_S11.pdf]

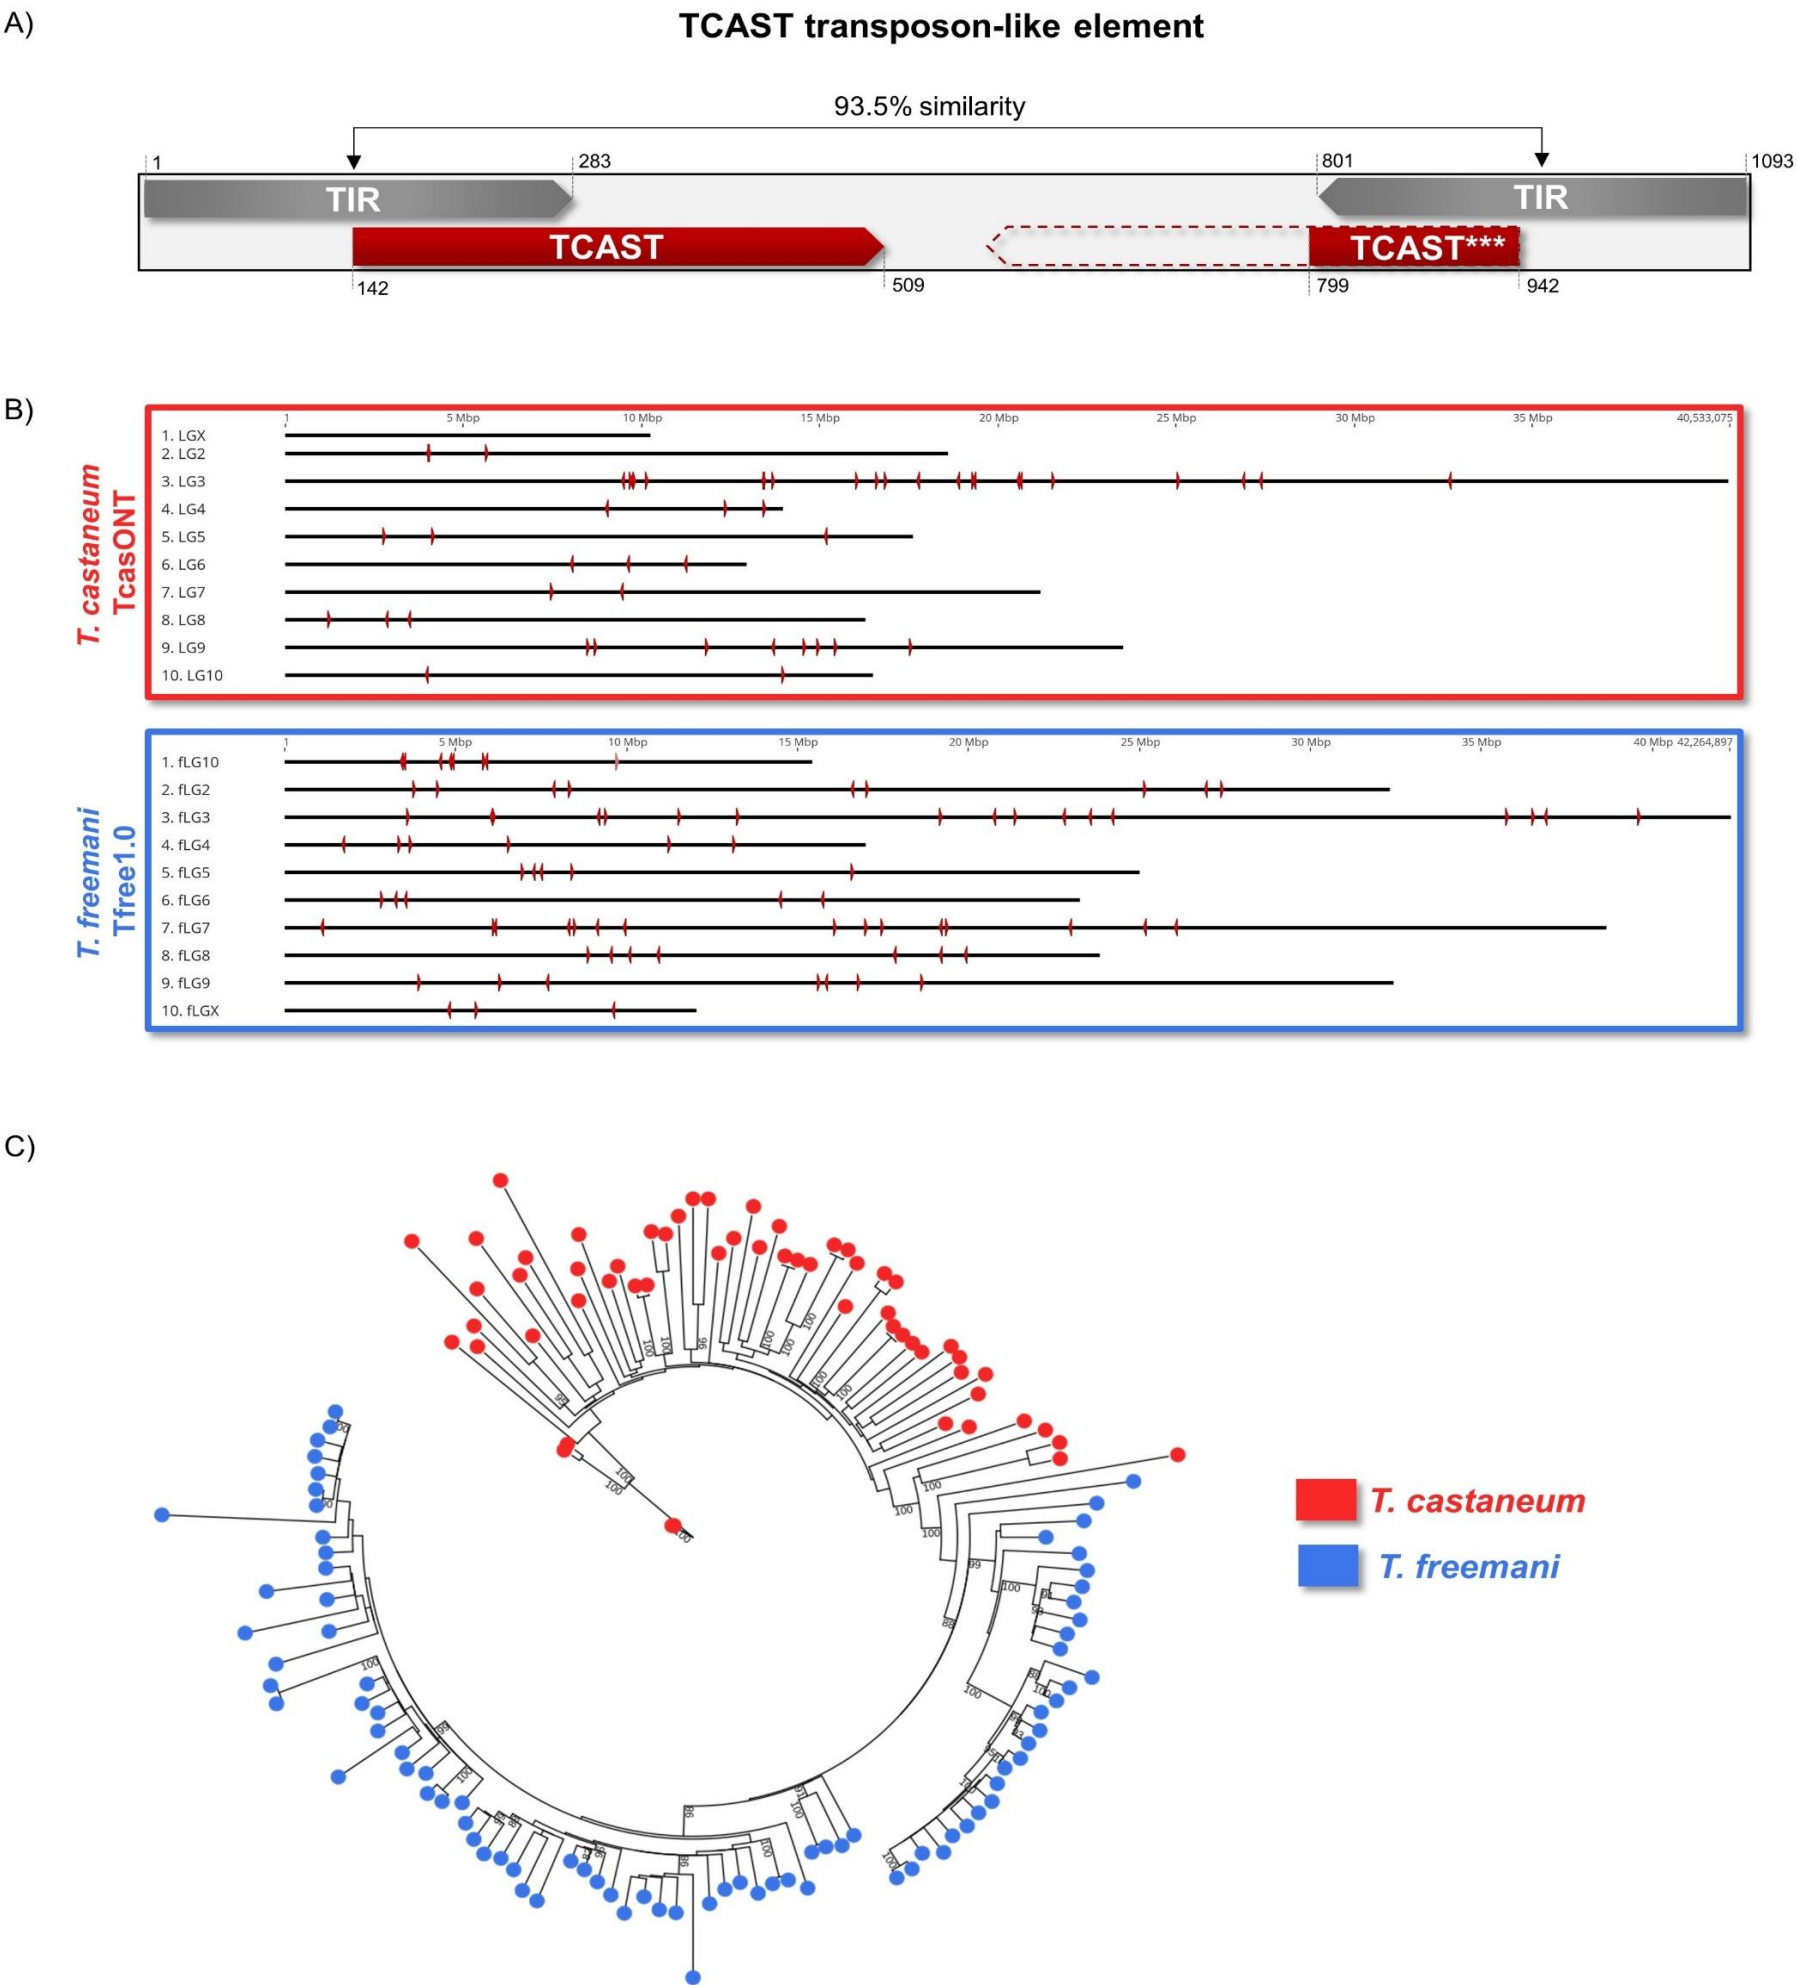

**Supplemental Figure S11.** *TCAST* transposon-like element structure and genome distribution. **A)** Schematic representation of the *TCAST* transposon-like element with the indicated positions of a 367 bp long segment corresponding to the *TCAST* satDNA monomer (*TCAST*) and its 143 bp long truncated version (*TCAST\*\*\**). The inverted orientation of the segments is indicated by the direction of the red arrows. The terminal inverted repeats (TIR) of the DNA transposon-like element are indicated by gray arrows. **B)** Distribution of the 57 copies of the *TCAST* transposon-like element annotated in the *T. castaneum* assembly TcasONT (upper panel) and 84 copies annotated in the *T. freemani* genome assembly Tfree1.0 (lower panel). **C)** Maximum likelihood tree of the individual copies of the *TCAST* transposon-like element detected in the *T. castaneum* assembly (red) and in the *T. freemani* assembly (blue). The tree was inferred in iTOL with nodal supports based on 100 bootstrap replicates (the values  $\geq 80$  are shown).
