# Supplementary material for: Dynamic evolution of satellite DNAs drastically differentiates the genomes of Tribolium sibling species
Source: HighWire-hosted journal article supplement (doi:10.1101/gr.280516.125), 2025-09-16
Supplement: Supplemental_Figures.zip [file Supplemental_Fig_S12.pdf › Supplemental_Figures/Supplemental_Figures/Supplemental_Fig_S12.pdf]

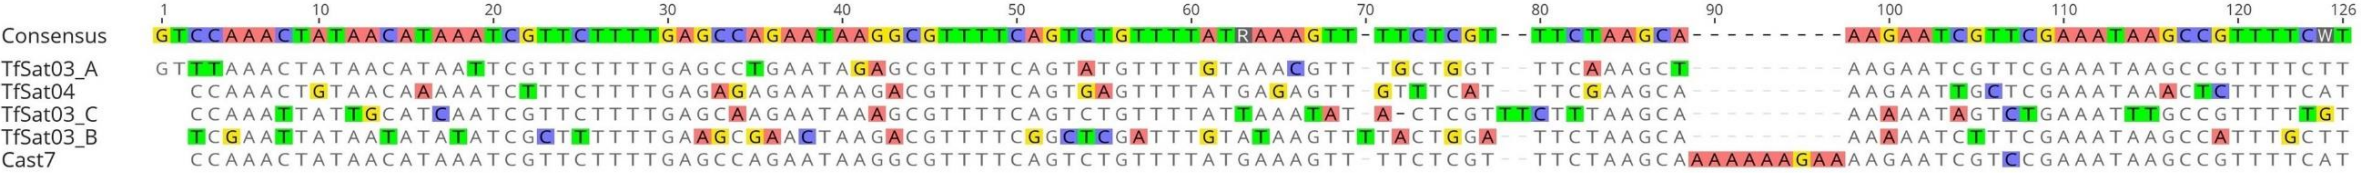

|           | TfSat03_A | TfSat03_B | TfSat03_C | TfSat04 | Cast7  |
|-----------|-----------|-----------|-----------|---------|--------|
| TfSat03_A |           | 71.68%    | 71.05%    | 72.32%  | 79.34% |
| TfSat03_B | 71.68%    |           | 60.00%    | 62.83%  | 67.21% |
| TfSat03_C | 71.05%    | 60.00%    |           | 66.67%  | 74.80% |
| TfSat04   | 72.32%    | 62.83%    | 66.67%    |         | 76.86% |
| Cast7     | 79.34%    | 67.21%    | 74.80%    | 76.86%  |        |

**Supplemental Figure S12.** Relationships between *T. freemani* satDNAs *TfSat03* and *TfSat04*, and *T. castaneum* satDNA *Cast7*. In the consensus sequences' alignment of *Cast7* and *TfSat04* monomers and *TfSat03* subunits A, B and C, differences between the compared consensuses are colored and dashes indicate alignment gaps. The attached matrix shows the percentage of pairwise identity between the compared sequences.
