# Supplementary material for: Dynamic evolution of satellite DNAs drastically differentiates the genomes of Tribolium sibling species
Source: HighWire-hosted journal article supplement (doi:10.1101/gr.280516.125), 2025-09-16
Supplement: Supplemental_Figures.zip [file Supplemental_Fig_S13.pdf › Supplemental_Figures/Supplemental_Figures/Supplemental_Fig_S13.pdf]

# 1) TfSat05 - Cast4 (pairwise identity: 80.7%)

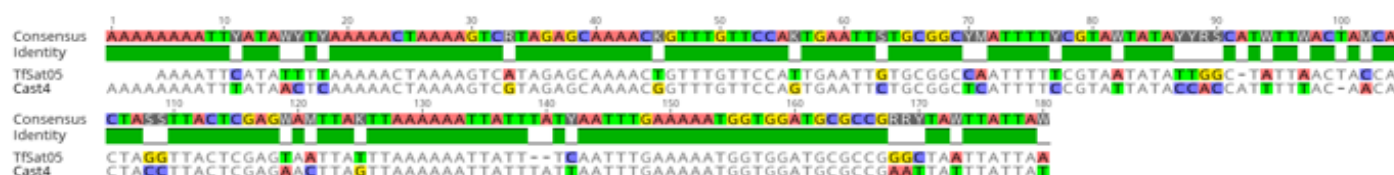

# 2) TfSat07 – Cast8 (pairwise identity: 81.5%)

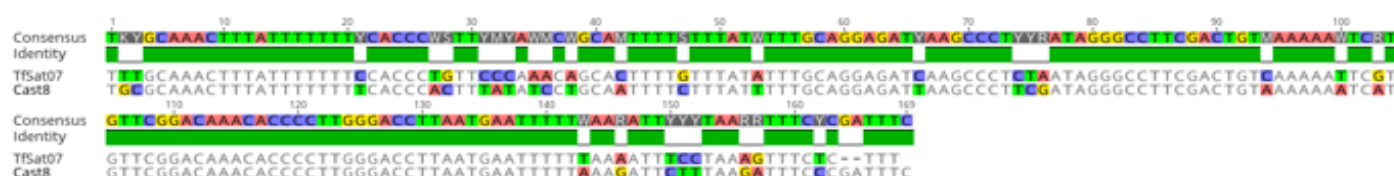

# 3) TfSat08 – Tcsat17 (pairwise identity: 90.0%)

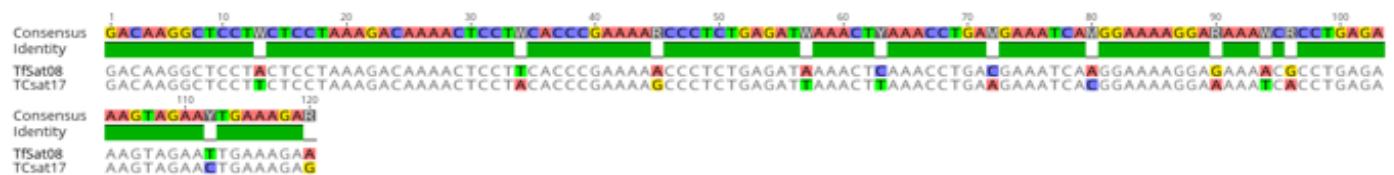

# 4) TfSat11 – Tcsat13 (pairwise identity: 82.2%)

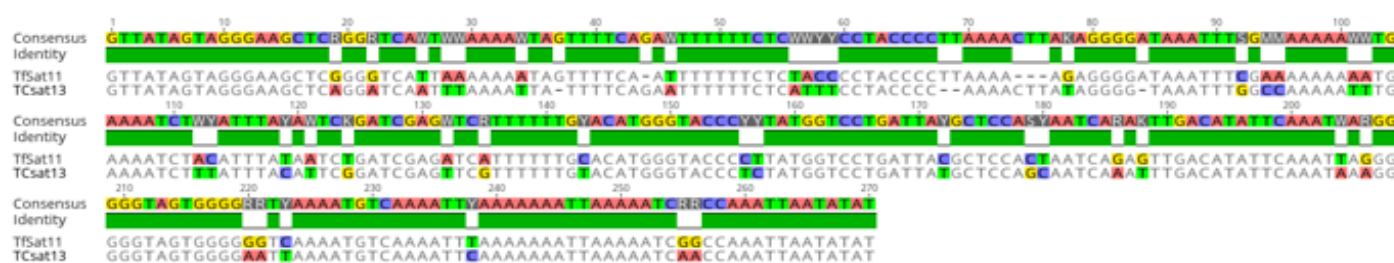

# 5) TfSat15 – Tcsat23 (pairwise identity: 94.5%)

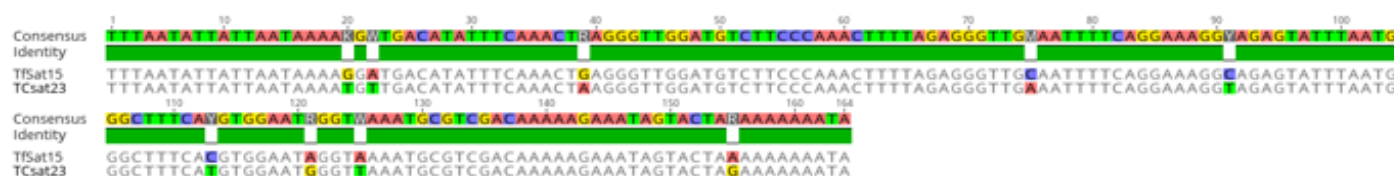

# 6) TfSat22 – Cast9 (pairwise identity: 81.7%)

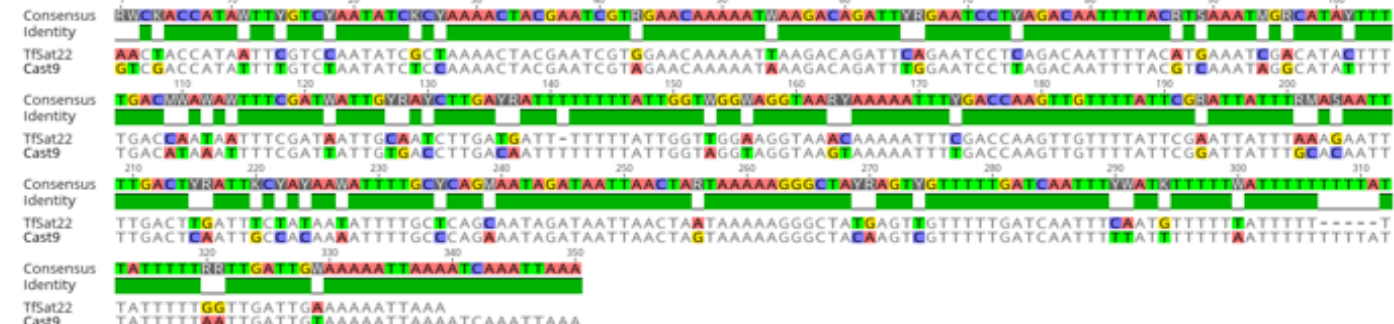

# 7) TfSat25 – Tcsat12 (pairwise identity 94.8%)

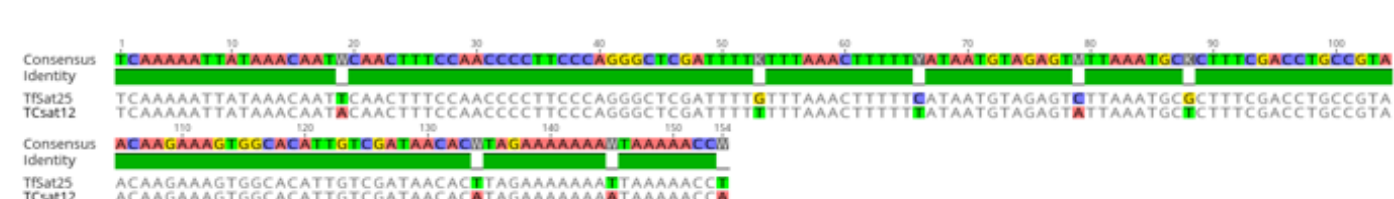

# 8) TfSat27 – Cast6 (73.5%)

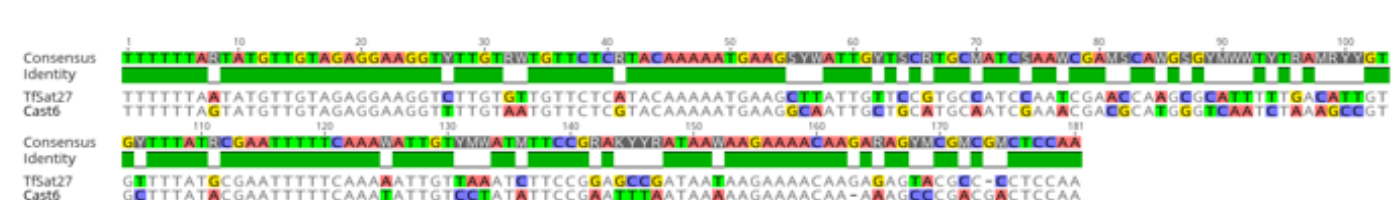

# 9) TfSat42 – Tcsat29 (63.8%)

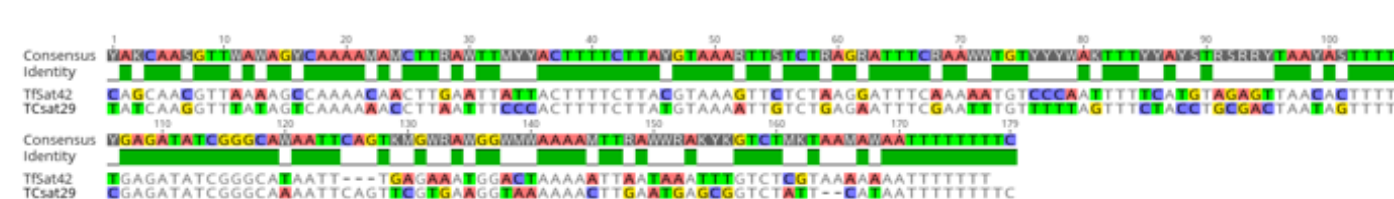

# 10) TfSat76 – Tcsat30 dimer (pairwise identity 83.3%)

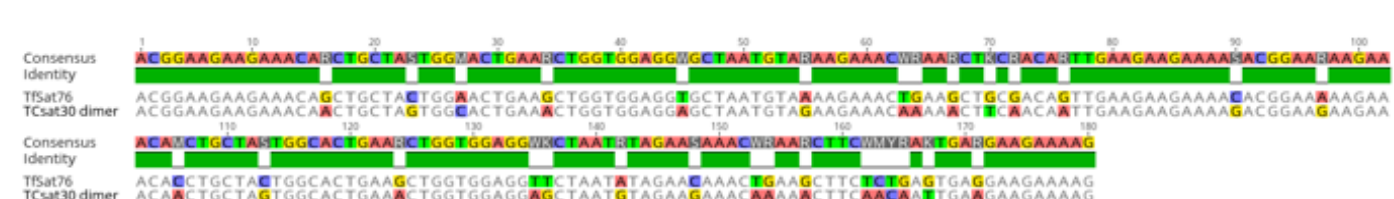

# 11) TfSat111- Tcsat32 (pairwise identity 77.3%)

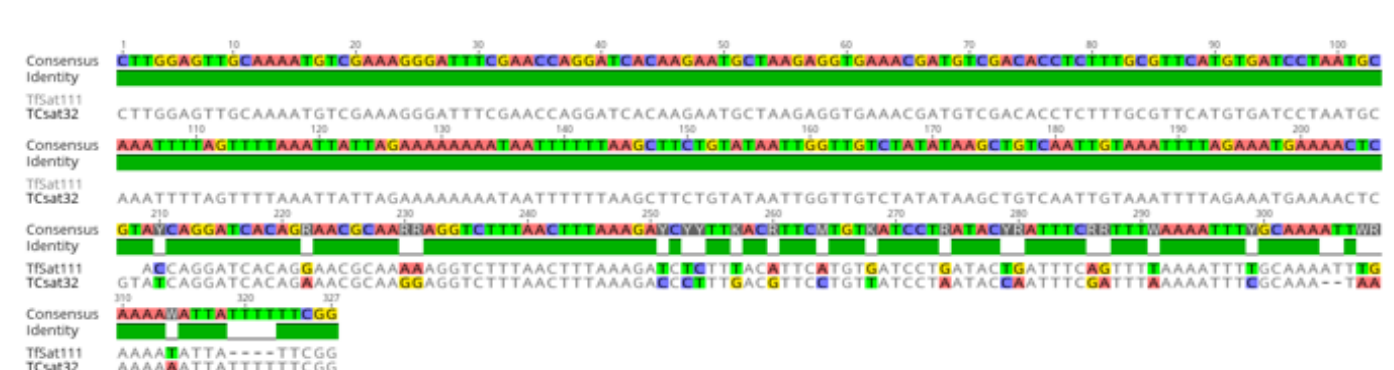

**Supplemental Figure S13.** Alignments of the *T. freemani* satDNAs (*TfSat*) and their orthologs among the known *T. castaneum* satDNAs (*Tc* and *TCsat*). Pairwise identities between the consensus sequences are indicated in the parentheses.
