# Supplementary material for: Dynamic evolution of satellite DNAs drastically differentiates the genomes of Tribolium sibling species
Source: HighWire-hosted journal article supplement (doi:10.1101/gr.280516.125), 2025-09-16
Supplement: Supplemental_Figures.zip [file Supplemental_Fig_S15.pdf › Supplemental_Figures/Supplemental_Figures/Supplemental_Fig_S15.pdf]

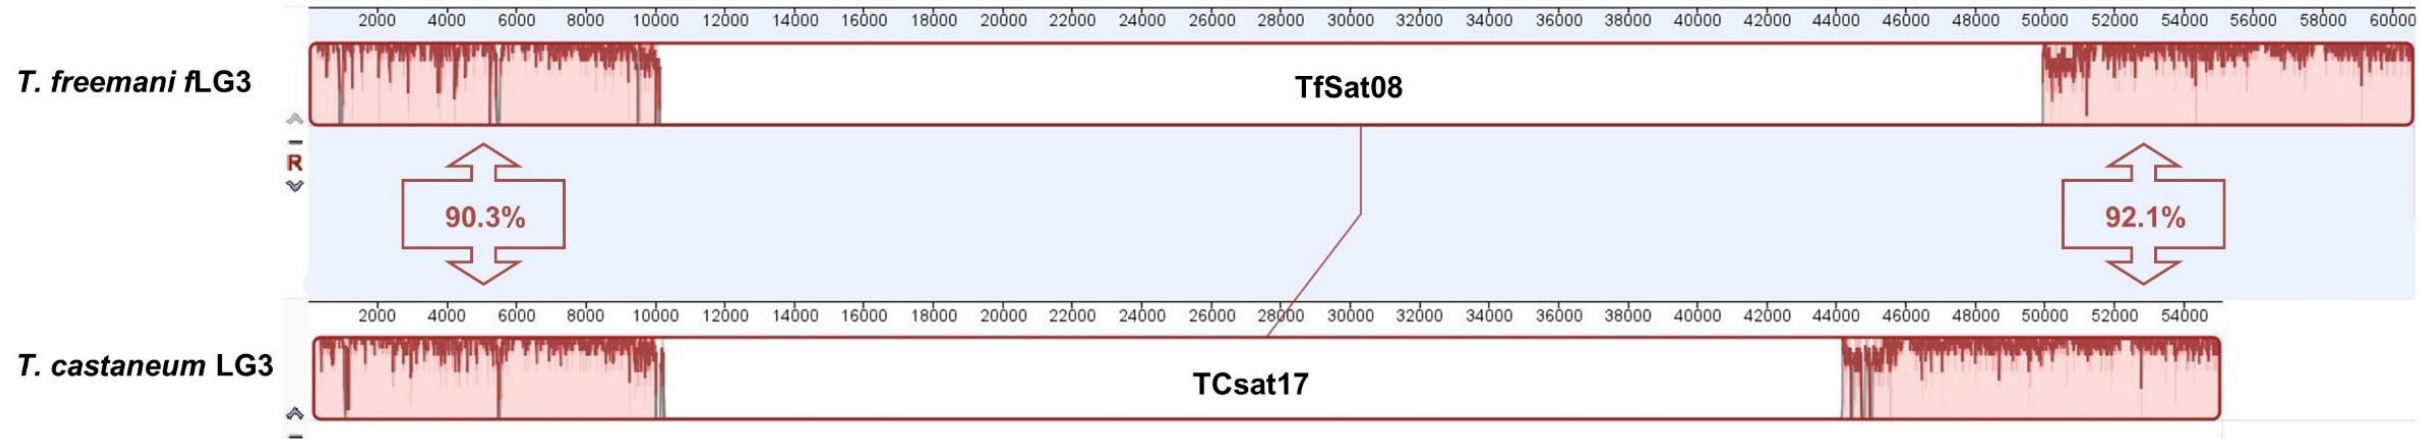

**Supplemental Figure S15.** Comparison of the 10-kb flanking regions of the orthologous satDNAs *TfSat08* and *TCsat17* reveals the syntenic locus where the satDNAs are located in *T. freemani* (on Chromosome flG3) and *T. castaneum* (on Chromosome LG3). The interspecific sequence similarities between the flanking regions are indicated within up-down arrows.
