# Supplementary material for: Dynamic evolution of satellite DNAs drastically differentiates the genomes of Tribolium sibling species
Source: HighWire-hosted journal article supplement (doi:10.1101/gr.280516.125), 2025-09-16
Supplement: Supplemental_Figures.zip [file Supplemental_Fig_S16.pdf › Supplemental_Figures/Supplemental_Figures/Supplemental_Fig_S16.pdf]

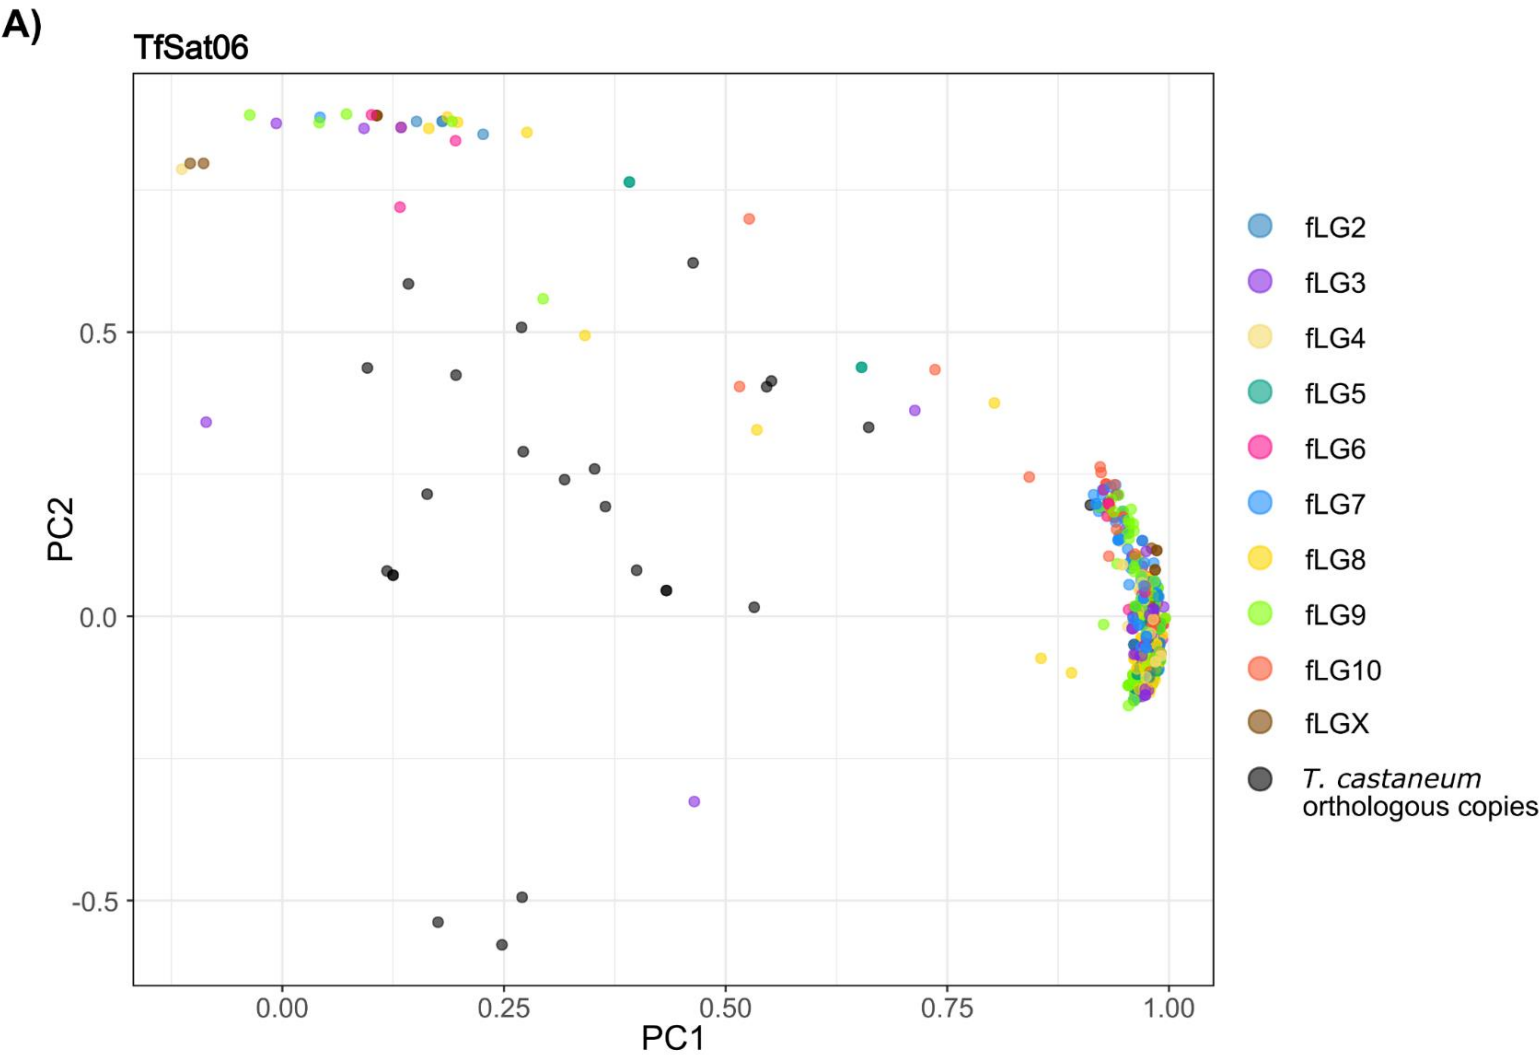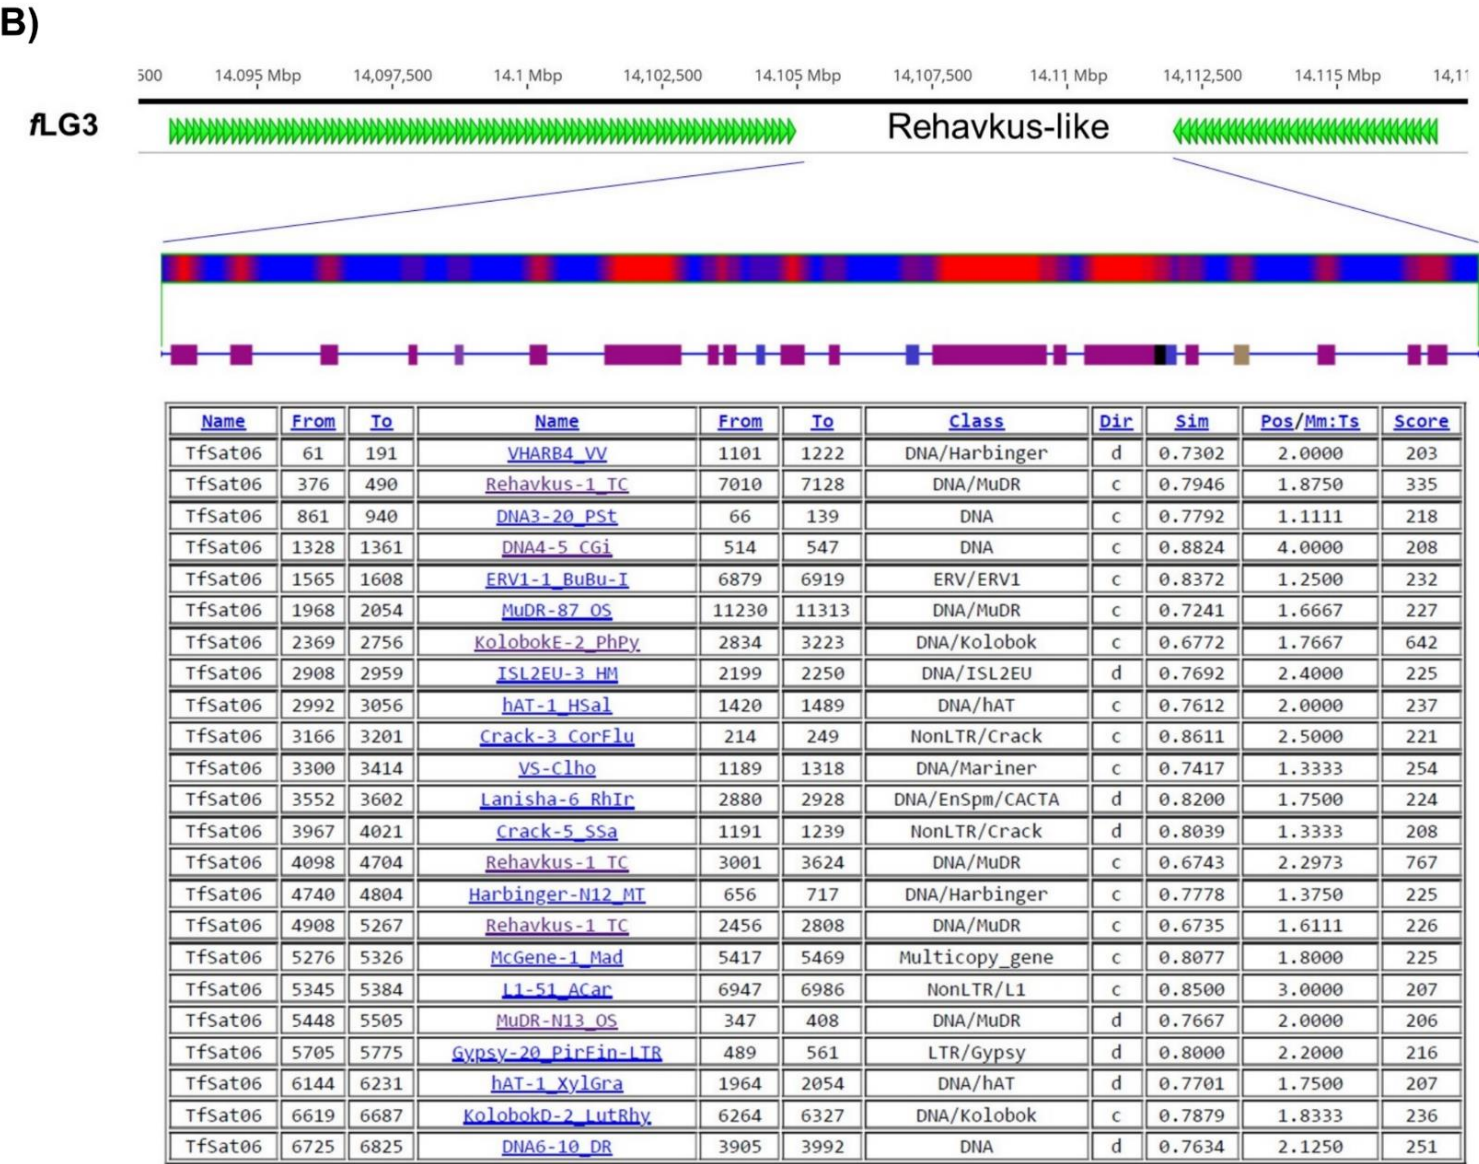

**Supplemental Figure S16.** Organization of the *T. freemani* satDNA *TfSat06*. **A)** The principal component analysis of the *TfSat06* repeats from different *T. freemani* chromosomes. Dots represent repeats colored according the chromosome (fLG) of origin. **B)** Schematic representation of the organization of the Rehavkus-like element whose inverted termini harbor the *TfSat06* repeats (represented by green arrows). The table reports the segmental similarities of the central part of the Rehavkus-like element with the repetitive elements deposited in the Repbase database. The similarities refer to the segments (purple blocks in the diagram) whose positions are listed in the table together with the similarities and alignment scores.
