# Supplementary material for: Dynamic evolution of satellite DNAs drastically differentiates the genomes of Tribolium sibling species
Source: HighWire-hosted journal article supplement (doi:10.1101/gr.280516.125), 2025-09-16
Supplement: Supplemental_Figures.zip [file Supplemental_Fig_S17.pdf › Supplemental_Figures/Supplemental_Figures/Supplemental_Fig_S17.pdf]

**TfSat22 / Cast9 repeats**

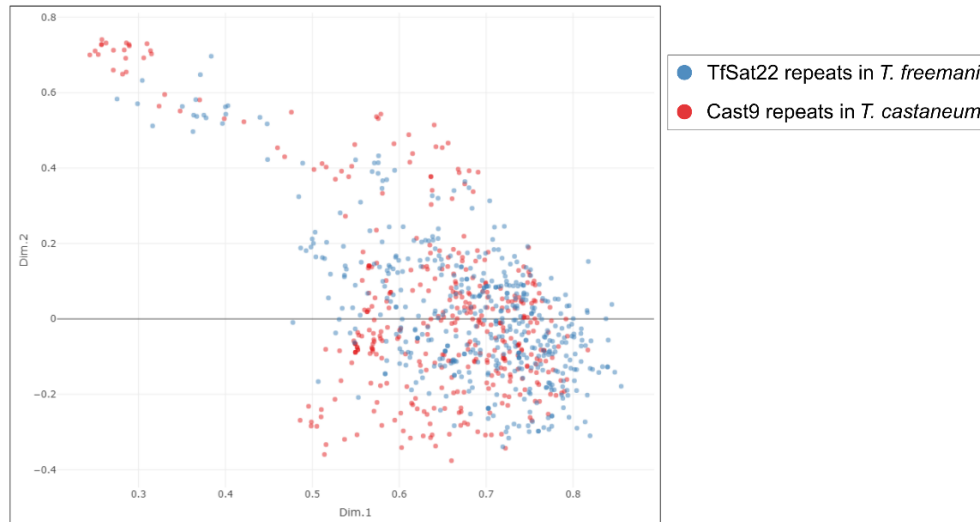

**TfSat22 in *T. freemani***

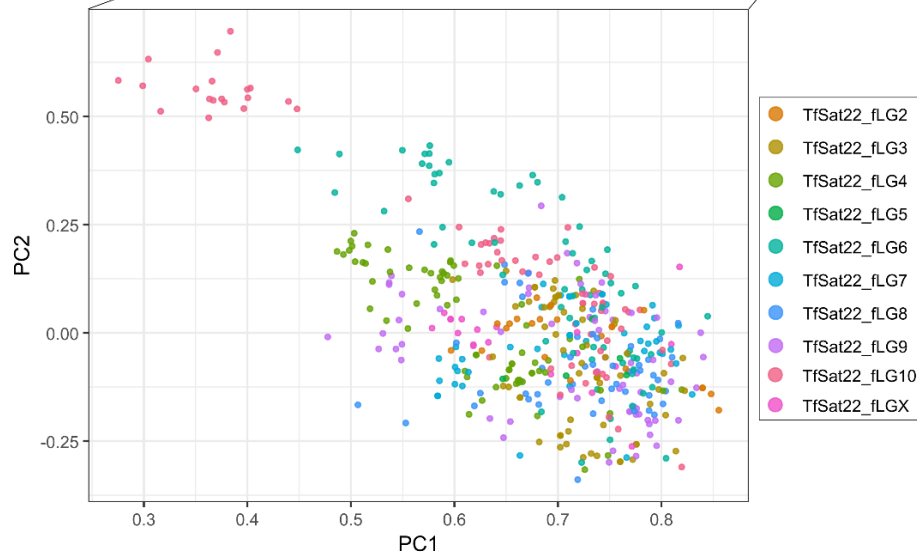

**Cast9 in *T. castaneum***

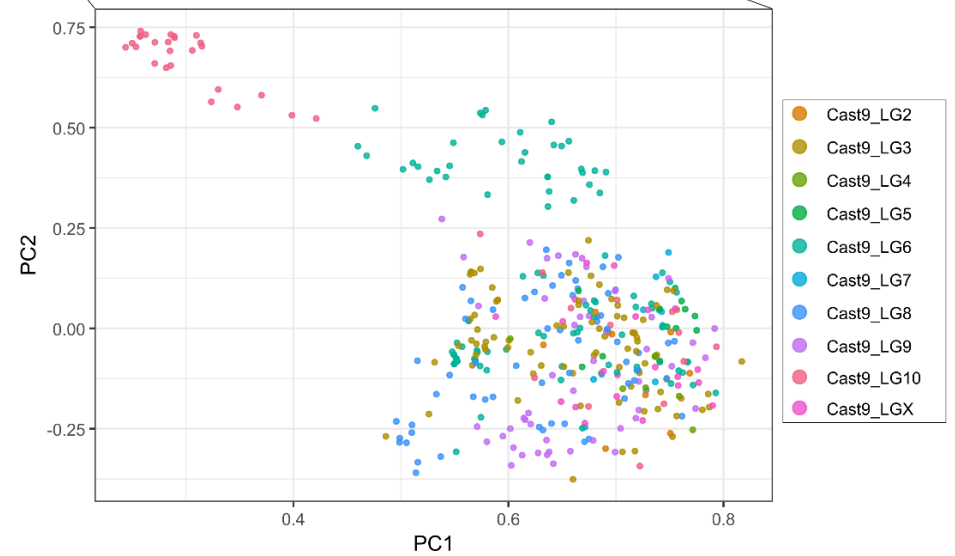

**Supplemental Figure S17.** Principal component analysis (PCA) of the orthologous satDNAs *TfSat22* and *Cast9*. The upper panel shows intense mixing of *T. freemani* *TfSat22* repeats (blue dots) and *T. castaneum* *Cast9* repeats (red dots). Interchromosomal homogenization within the species is shown in the lower panels (*T. freemani* left, *T. castaneum* right), with the repeats of individual chromosomes colored according to the attached color legend.
