# Supplementary material for: Dynamic evolution of satellite DNAs drastically differentiates the genomes of Tribolium sibling species
Source: HighWire-hosted journal article supplement (doi:10.1101/gr.280516.125), 2025-09-16
Supplement: Supplemental_Figures.zip [file Supplemental_Fig_S18.pdf › Supplemental_Figures/Supplemental_Figures/Supplemental_Fig_S18.pdf]

**A**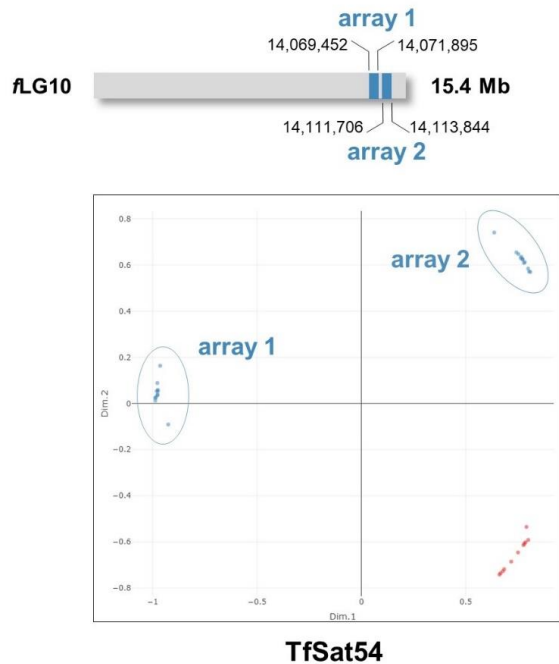**B**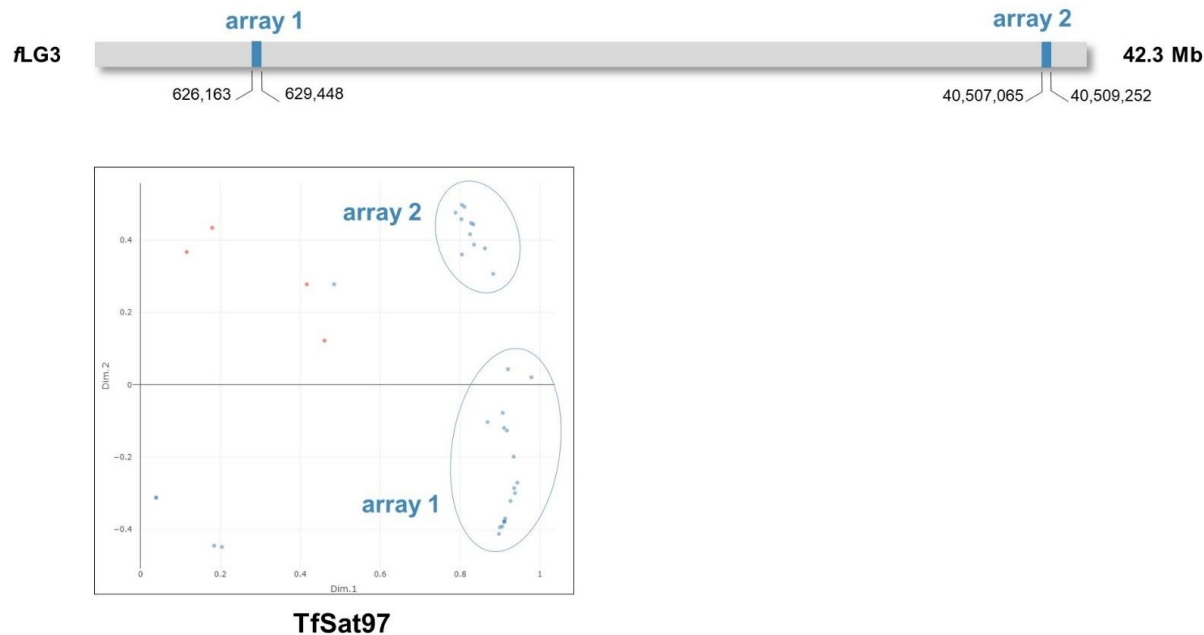

**Supplemental Figure S18.** Organization of the *T. freemani* low-copy-number satDNAs *TfSat54* (A) and *TfSat97* (B), showing intraarray homogenization. The positions of the arrays on the chromosomes are indicated on the schematics (the size of the chromosomes is indicated on the left). Clusters formed by repeats of the same array are circled in the PCA plots. Red dots represent orthologous copies detected in the sibling species *T. castaneum*.
