# Supplementary material for: Dynamic evolution of satellite DNAs drastically differentiates the genomes of Tribolium sibling species
Source: HighWire-hosted journal article supplement (doi:10.1101/gr.280516.125), 2025-09-16
Supplement: Supplemental_Tables.zip [file Supplemental_Table_S1.xlsx]

## Sheet: Table S1
Supplemental Table S1. The output of six clustering analyses (T1-T6) performed by the TAREAN pipeline using Illumina paired-end whole genome sequence reads of the flour beetle T. freemani. With the exception of analysis T1, all other analyzes (T2-T6) used sets of input reads from which reads corresponding to the major satDNA (Juan et al. 1993) were excluded. The genome coverage was calculated bas…
TAREAN clustering analysis	T1	T2	T3	T4	T5	T6
No. of input reads	175000	175000	450000	880000	1300000	1500000
No. of analysed reads	44222	175000	450000	880000	1300000	1411839
Genome covered by anaysed reads	~0.02x	~0.1x	~0.2x	~0.4x	~0.6x	~0.7x
Proportion of reads in top clusters	0.43	0.3	0.36	0.4	0.42	0.42
No. of reads in clusters	24,445 (55.28%)	83,951 (47.97%)	262,022 (58.23%)	602,466 (68.46%)	981,268 (75.48%)	1,087,125 (77%)
No. of clusters	1989	12053	39925	97615	159351	175480
No. of singlets	19777	91049	187978	277534	318732	324714
No. of satellites	5	12	27	41	96	107
No. of high putative satDNAs	3	3	7	11	30	26
No. of low putative satDNAs	2	9	20	30	66	81
