# Supplementary material for: Dynamic evolution of satellite DNAs drastically differentiates the genomes of Tribolium sibling species
Source: HighWire-hosted journal article supplement (doi:10.1101/gr.280516.125), 2025-09-16
Supplement: Supplemental_Tables.zip [file Supplemental_Table_S2.xlsx]

## Sheet: Table S2
Supplemental Table S2. Consensus sequences and GenBank accession numbers of the 135 T. freemani satDNAs identified in this work.
SatDNA	Consensus sequence	GenBank Accession Number
TfSat01	GTAAAAAATAGTTCATAATTCAAAAACTATTAGGAATACTGCGATTTTTTTGACTTCAATCGATTGCCTGGATCATTTTGCATCGGCAAAGGTCCAAACAGTTCCACTGTTTCGAATAGTATAGCCGTAAGTGGAGAAAATAAATAAAATCAAAAATTTATAAAAA	PQ553299
TfSat02	TATAATACGTAGAATGAGCCGCAGAATTCACTGGAACAAACCGTTTTGCTCTACGACTTTTAGTTTTTAAGTTATGAATTTTTTTAGTGTTAAACTTTAAATGCCTCTGTACCCGGAACCGGTGCCCGGAGCGGCTCCGGGTTTAATCGAGAAAATAGATAATTTTAAGCGCTATCTGATGCATTCTTAAAATTTGCTCTAAGTCTTATAGTTTCCGAGAAAAACGCAAAAAAAGGTTGCCATTTTCACTTTTTTCTAATTTTTAAACGCCGATTACGGCGAAACTATAAGAGTTAGAGAAAAACGGTAAAAACGGTTAGAAGCGGTATAAAAAGCCCTACAAACTGGCATAGGTTTCAAGGCGATATCTCGCAAAAAATTTTTCAATTTTCAAACGTC…	PQ553300
TfSat03	GTTTAAACTATAACATAATTCGTTCTTTTGAGCCTGAATAGAGCGTTTTCAGTATGTTTTGTAAACGTTTGCTGGTTTCAAAGCTAAGAATCGTTCGAAATAAGCCGTTTTCTTTCGAATTATAATATATATCGCTTTTTTGAAGCGAACTAAGACGTTTTCGGCTCGATTTGTATAAGTTTTACTGGATTCTAAGCAAAAAATCTTTCGAAATAAGCCATTTGCTTCCAAATTATTGCATCAATCGTTCTTTTGAGCAAGAATAAAGCGTTTTCAGTCTGTTTTATTAAATATACTCGTTTCTTTAAGCAAAAAATAGTCTGAAATTTGCCGTTTTTGT	PQ553301
TfSat04	CCAAACTGTAACAAAAATCTTTCTTTTGAGAGAGAATAAGACGTTTTCAGTGAGTTTTATGAGAGTTGTTTCATTTCGAAGCAAAGAATTGCTCGAAATAAACTCTTTTCAT	PQ553302
TfSat05	AAAATTCATATTTTAAAAACTAAAAGTCATAGAGCAAAACTGTTTGTTCCATTGAATTGTGCGGCCAATTTTTCGTAATATATTGGCTATTAACTACCACTAGGTTACTCGAGTAATTATTTAAAAAATTATTTCAATTTGAAAAATGGTGGATGCGCCGGGCTAATTATTAA	PQ553303
TfSat06	CTGCCTAATCAGATTCTCTTGCAAAGTCACCCTTTAACCCAGCCACAACCCTCGTTTTAGAAAATACGATTTTTTGAAGAATTCCGATCTGACAAAACAAATTGAGATATGCCAAAAAATTTCTTATTTTTTGTTGAATAAAA	PQ553304
TfSat07	TTTGCAAACTTTATTTTTTTCCACCCTGTTCCCAAACAGCACTTTTGTTTATATTTGCAGGAGATCAAGCCCTCTAATAGGGCCTTCGACTGTCAAAAATTCGTGTTCGGACAAACACCCCTTGGGACCTTAATGAATTTTTTAAAATTTCCTAAAGTTTCTCTTT	PQ553305
TfSat08	GACAAGGCTCCTACTCCTAAAGACAAAACTCCTTCACCCGAAAAACCCTCTGAGATAAAACTCAAACCTGACGAAATCAAGGAAAAGGAGAAAACGCCTGAGAAAGTAGAATTGAAAGAA	PQ553306
TfSat09	GGCAACGGCACGCGGTGTTCCCAAGCAAATTGTAAATTTGTCAATTGTAAATTTTGTCGTCTTCAAAAGAGATTAACTATAAAATAATAAGAATATTTAGAATGTAAGTGCAAAAAAAAGGA	PQ553307
TfSat10	GTAAAATTTCAGTTTTTCAACGATTTCAAGTACTAAATATTTTTCTAATTTGACAAAATTTCACGTGTGCTTTAAGTACCACAAGCAGCACTTGCTGCCACTATCATTTAACCCCTCACCCTTTCCGGAAGGGTAGTTCACTCTT	PQ553308
TfSat11	GTTATAGTAGGGAAGCTCGGGGTCATTAAAAAAATAGTTTTCAATTTTTTTCTCTACCCCTACCCCTTAAAAAGAGGGGATAAATTTCGAAAAAAAAATGAAAATCTACATTTATAATCTGATCGAGATCATTTTTTGCACATGGGTACCCCTTATGGTCCTGATTACGCTCCACTAATCAGAGTTGACATATTCAAATTAGGGGGGTAGTGGGGGGTCAAAATGTCAAAATTTAAAAAAATTAAAAATCGGCCAAATTAATATAT	PQ553309
TfSat12	GCAGGCGCAAAATTCGAACCGCAGGCGAGTTGTTTTCCTTAGCAACGGGACAGAAATAGCGCC	PQ553310
TfSat13	GCTTGCGGTCGAGCTCTCTGTCGACGTAATTTCGCTAGAAGTCGTCGATTCTGTGACTGTTGG	PQ553311
TfSat14	TTCACATGCAATATGCAGTGGCAAACTACCATTTTTATTACAAACATCCAAACTTTGACCCTTTTCTAGAAGTAATTTTACAATATCGCAACCATACTTTTCGTTTTCACATGCCATATGTATTGGCAAATTGCCATCTTGATCGCAAACATCCACCTTCGAGCCATGATCAAGAAGAAATTTTACGACATCCACGCTCCCATG	PQ553312
TfSat15	TTTAATATTATTAATAAAAGGATGACATATTTCAAACTGAGGGTTGGATGTCTTCCCAAACTTTTAGAGGGTTGCAATTTTCAGGAAAGGCAGAGTATTTAATGGGCTTTCACGTGGAATAGGTAAAATGCGTCGACAAAAAGAAATAGTACTAAAAAAAAATA	PQ553313
TfSat16	GCCCCAGCTAATGTCTATTGATTCCCAAAATGTCATTAAAAAATATTGACTACACTAGCCTGAAAAAAATCTTGTTTGGTCTAAGAAGGCAAAAATAGAATTTTCCTGCTACTTCAATTCAAAAAATTATATCTTCCCAACCCTTTTTATTTCAACTATTAAATTTTGTACAACTATA	PQ553314
TfSat17	AAGTCGGAATTGCCAGTTACTAAGTCGGAATTGCCAGTTAGTAAGTCGCAATTGCCAGATACT	PQ553315
TfSat18	TTGGTGACCTGGTGACTTGTGACTTGGTGACCTGGTGACTTTGTGACTTGTGTCTTGGTGACTTATTGATTTGGTGAC	PQ553316
TfSat19	CTTTTTTACCTATTAGCAAATCGATTTATCAACCGACTGCCGTAGTAGCAGATCTACCGACCA	PQ553317
TfSat20	ATTATAAATGTTATAAAAATAATATTATAATTTATTAAACGGCGTACTTCGTGTAAGTTATGCAAAAATTATACACAATTGGTGTACTAAGGGTTGCATGTTTTATTAATTTTTCTTTTTTTAAGTGTTATTATAATGTGTTTGATGTTTATATTGTGTAAATAAACAATAACTATCTCTGTTATTTATTCTTCAATTTTGCAATAAAAATTTCATCATTATATTA	PQ553318
TfSat21	GCAAAGGGGTGAGCGATTTTTTTCCATTTTTCAAGTGCTTCAATTGTGGCTGGGAGAGCGCCTCTATAGGCAGTCAGAGACAATTCTAGGTGCATTATTGCTTAGCAACGGTACCAGAAATGCCCCTGAAAAGGGTTCAAAAGGGCTCAAAGGGGTACGTAGTGAACGGAAGGGGGGCCGGTAGGCCCCCCTGGAGAGAGCTAGTTTAACTATACTAAATCGTGATAGCTGCGTCCTTTTTCAATCGACTTGAATTTGGGTGGTTGGACATGCTATTCAAGTGGATGATTTAACTTTTGAAAAAAATCTTTATGATGGATTCTATTTGTATAAATTAAATCGGAAAGAATGAATGAATTGCATAGGACCTATCTAATTACGATTGGGGGGCTATTAAAA…	PQ553319
TfSat22	AACTACCATAATTCGTCCAATATCGCTAAAACTACGAATCGTGGAACAAAAATTAAGACAGATTCAGAATCCTCAGACAATTTTACATGAAATCGACATACTTTTGACCAATAATTTCGATAATTGCAATCTTGATGATTTTTTTATTGGTTGGAAGGTAAACAAAAATTTCGACCAAGTTGTTTTATTCGAATTATTTAAAGAATTTTGACTTGATTTCTATAATATTTTGCTCAGCAATAGATAATTAACTAATAAAAAGGGCTATGAGTTGTTTTTGATCAATTTCAATGTTTTTTATTTTTTTATTTTTGGTTGATTGAAAAAATTAAA	PQ553320
TfSat23	ATCCCGAAATCGGTCTTGTCACACAATGCCCTTTTGGCAATTGATAAAGCATTAAAAAAGACATTTATTACAAAAAATTTCATAACAAAATTGTTGTCGGAACAATGTTAAAAAAAATAAACTTTTCTAGCTCCAAAAACGCATTATCCCAGTTTTTATCCTATTTC	PQ553321
TfSat24	CATCGTGTGAACTTTACTCCTAAGGGCCCTAATCACCATTTTTCTATTGTCCCCACATTAAAACCCTCAAACTTTATTTTTTCACACTCCCTTCCGGAAGATTGATTTTGTTCATTTTTGCACAAAACACAGCCTACCCAAAGGACTTTCTACTGCCAAAATAT	PQ553322
TfSat25	TCAAAAATTATAAACAATTCAACTTTCCAACCCCTTCCCAGGGCTCGATTTTGTTTAAACTTTTTCATAATGTAGAGTCTTAAATGCGCTTTCGACCTGCCGTAACAAGAAAGTGGCACATTGTCGATAACACTTAGAAAAAAATTAAAAACCT	PQ553323
TfSat26	AACTGTAAAATTACATAACAAATCAAGCTTAACAGCAGAAGTGTAAATTGTAAGTGTAAATTTAGTAGTAGTATTTAGTATTATAGGTACTAAACCAAAGTGTTCAAATGTGACAATTTCTTTTGTTATTTTTTAGAAAATATTTTATTTTTGTTTTGTTTATATTTTTGTATTTTGTTCTTGAAGTTTTCTAAATATATAATTTCTATATGAAATTTTTATTTTATTTTTTTGCATAACCTACAATTCAGAGTGTAAATTTACCACAATTTGCATAGTGCAAATTTACTTTGTATACTGTAATAATACAATACAATTAGTAAGTTTACATTGTAAACTTGCTCTTTGATACTGTAAATTTACTTTTTATGAAATCATATTGTAGTGTAATTTTACATT…	PQ553324
TfSat27	TTTTTTAATATGTTGTAGAGGAAGGTCTTGTGTTGTTCTCATACAAAAATGAAGCTTATTGTTCCGTGCCATCCAATCGAACCAAGCGCATTTTTGACATTGTGTTTTATGCGAATTTTTCAAAAATTGTTAAATCTTCCGGAGCCGATAATAAGAAAACAAGAGAGTACGCCCCTCCAA	PQ553325
TfSat28	TGTTTGTTCTAGATAGAAAATAATTACGGAATTGAAATCCTCGGACAATTTTACGTTAAAAAAAGGTAATTTCAAGATAATTCAAGGATTAAATAAATGTAGAAAAAATTTAAAAGGAACCCCTTACAACATCGGCAAAAATGAGCTTAACGCAGTTGTTGATAAATCGATTGACAAATCGCGAAATGTTTCTTGTACGTGAAAACTAAGTACAAATTTGAAATGCTTGGACAATTTTACGTAAGAAAATGTTAACTTTAGACCGATTGAACAATTAAGATTGTCTAGAAAAAATAATATCACTTCATTATCCAAGCTTGAAATAATATAAACGTCTAGAATGAGACATATATCTCGGAAAC	PQ553326
TfSat29	AAAAATACTCCTTTTAATACTGATGATTTTTTAAATTATTACACAAAACCTACGAATTCTAGAACAGTAGTAAGACTTTCACCATTTTAGATGGAAAAGTTTAAACTTAATTCTGTACTAATTCGATAAGGGATCGAACATAGTTTCTTTTTCCAATAAATTGAAGCAAAAGAGGGAAAAATTCGCTTTAATTAAATCGTCCAACTCAAAGTAAGCGAAATTCCAGCCAGTTGACCTTTAAATAATTGAAAA	PQ553327
TfSat30	CAATTTGGCACCGTCTCATATTTTTCAAAACGCTGCGAATATGGTTAAAGATACAAAAAAAATGTTGTAAACAAAGTTGTAGACAATTAAATTCTCTACAATTTTGTTCCTTACACTTTTTTTGTATCATCAACCGTATTGGCAGTGTTGTCAAAAATGTATTAAAAAAATTAAGCTATTAG	PQ553328
TfSat31	GTTGGGAAAATGTCAAAAGTAGCAAACGAATAACAAACAGTTTTGTTTAACAAAAACACAACTAGAGAATGAGAGCGTAAATGTGTTATTGGATTGTAACTTTTTAGTTAATAGAGTATTTTAAAATGTGTAAAGAAAAATGTCAGCTTGTTCTCATAGACCACCACTAATTTTCACCTTGTGTCAATGTATTTTTTTT	PQ553329
TfSat32	ATAACTTCTTCTCTAGATTCTTCAATAGAATTATTTTATAAATATTTCTTCTACATTCTTCAAATTCTTTTTTAATTTCTTCTCTGCATTTTTTCACAATTCTTCTTTAGTTTCGTTTATAATTTTTCCAAATTATTTTTTAGCATAATTTCTACTTTCTTCTCTAGATTTTTCTAAAGTTTCTTCTTTGATTCTTTTCTAAACATCGGAAATCTGGACTCTTTTAGAGTATTTTATAAATACATCTTTAGATCATTAGATTGGTTT	PQ553330
TfSat33	TCTCTAAAATCTCCGTTGGGATTATTTTGTAAACTCTATTCAAAATTCTTTTATAAAAACTTTTTCCACATTTTCTAAATTCTCTATTAGATTCTACTCTGCTATCTCTAGTTGCGTTTAGAATTCTTCCAGATTCCTTTATAAAACCGTCTCTAGATCTAAAGTCCGGATTCTTCTTTATTAGGTGTTTTATAAATTCTTCTCTAGATTTTTGTGTCCTATTATTTTCTAGGCTCTTCTCAAAATTCTTTAATAAAAACTTCTTCCATATTTTCTAAATTCTTTATTAGATTCTACTCTGCTTTCTCTATAGTTTCGTTTAGAATAATTCTTTTGAATTATTTTTTAGCATTATTCCTGTACTATCCTCACTACATTCTTCCCAAAAAATTTCTCTAA…	PQ553331
TfSat34	TTCTCTTTTTTTTAATTCTTCTCTGATTCTTTTATCGACCTGCTGTCGAGACTCTTTTTTAGATTCTTTTAAAAATTCTTCTCTAAAGTCTCTTTTAAAATTATTTTGCACTTTTAAGATTCTTAAGATTCTTTTCTGATTCTATTCAAGAGACGACTGTAGATCTAAAATTTGGACTCTTCTTTAGTTTGTTTTATTAATTCTTCTCAAAATTCTTCTTTACAATTATTTTCTAAACTCTATTCATTTTTTATATAATATCACTTCTATATTTTTTCTATAGTCTCCAAATTCTTTAATTTTTTAAATTCTACTTAGCTTAGCTGGAAAGATCCTCTATAGTTTCGTTTGAAATTTTTCCAGATTATTTTTTAGCATTATTTCTTATACTC	PQ553332
TfSat35	TTACTTTAGTTTAGTTAAAAAACTTACATTTTGAAGTATTTTGTATTTTTTGTATTTACTTTAGAAAAATTATTGATTTTATATCAAGATTTTTTACATTATTTCATTTTTAGTAT	PQ553333
TfSat36	AAAATTGTTCCAGAATTTCGAGTCTGTTGTCGTTTTTCGCCTACCAGTTACAATTTTTGAGATATTTGCCACCGTTCAATTCTACGTTGTCAAAATTAAATTTAAAAGCACCTTCAAAATATTTAATTTTTTTCACAGCTACAAACGTCCAAAATATCTTAAATTCTAACTTTTCTAACGTAAAATTCTTCAAGGATTCCAAATTTGTTTTCAATTTTGTTCCACAATTGGTAGTTTACGAGTTATGGGCATTGAGAAAAAACTCTGAAAAATTGCAGATACATTTATGATTTTTTTTCGTCAAAGATGACAGTTCAAGACCTTCAAATTTTGGCTCTTTTTACGTAAAAAAGTCTCAGGATTCCAAATCTGATTTTAGTTTTTGTCTACGACCAACAA…	PQ553334
TfSat37	GCGTCGATTTACGAAAATAAGCATAAAAATAAGTTAAAAAAAAATATTCGTATTACTTTTGAAATTTTTAAGCAAAAATTGTTAAAAAACATATTAGGTATAAACATAAACAAAAAATAAATCAAAGAGAAAAAACCAAAAAATTAAATTTAGAACCCATTGGTATCATTTTCT	PQ553335
TfSat38	TAAAGTTTCTCAAAAAATATCTAAGAATGCGTATTATTTTGCAGTTAAAAAAAACAAGGGTTCTGACAACAAAACTATGAGATAAGATTCTGTATTTCTTAGTTTCTTAAATTTTTTTTCAGTTCAGTTTAATAACACAAATTTTCAATAACTCGAACTATTTTTGTGGCAACTGTCGCTTCGAGTTACTGAAATTCGACTGTATTTATTTTCTGTATTCTCAATCACAATCTCTGTCTATGGAACTGTGATATACCAATGAACATTATTCTTACTATTATTATTATTTTCCTCTTACAAGACTAATGTAAAAAGTAATGTAAATCTTTTAGAATAAAAGTGTAAGCTAAAATAAATGCTGTATCAGTTTTCAAATAAAAAAAAATAAATGCAAAACTT…	PQ553336
TfSat39	TTTTTTAAATAGAGAAGTCTAAATAACTCAATTTTTAACTTTTCTTATGCAAAATTATCTGAGGATTCCAAATCTGACAATATTTCTTAACTACGGCGGATAGTTTTTGTGATATCAATGTTTGATAACTCAAAACACAAATAAGTTAAAGTGAAAGATGAGTGCTTTTATTTAATTTTATTTTTTTTAAGTTAGACGGTCTACACAACTGAAACATTAGCTTTCCATATGCAAAATTATTCAAGAATTCTGAATCTGTATTTATTTTTTATGTAACAGCAATAGTTTTTAAGATATCGACCAAAGTTGAAGAAATTGGTTAAAATTTATTTTGACAAAATCCAAACACTTGTTT	PQ553337
TfSat40	TTATTCAATTTTTTTGGACAAACGAAAAATCTAAAGAACTAAATTTTTAACTTTTCTTACACAAAATTGTCCGAGGATTCTGAATCTATCGTTATTTTTTATATACAATCAATAGTTTTTAAGATATCGGTTAAAGTTTGAGACATTGGTTAAAATTCATCTTGTCAAAATACCAACATTTGATT	PQ553338
TfSat41	TCAGTCGACATACAAAGACAAAGAACCTTAATTTTTGACATTTCTAATGTAAATTTATCTCAGGATTTCAAATCTAATTTTATTTTTTATGTAGGGTTTGTAGTTTTTGCAATATGGGGCAATATTCGGTTCGTCGAGCTAAAAATTTTTAGGTAAGTAGTAAATGTTAGAAAAAAAATATTAAAACAGCCCAAAAAAAATCAAATTTGGGTTTTCTAATGTAAAATTGTCTCAGAATCTCAAATCCGTTATTGTTTTTTATGTACAACTAATAGTTTCTGAGATATTGATCAAAATCAAGTCCTGAAGGTAAAAATTTTGAATGACCGAGCAATTCAAGAATTTTT	PQ553339
TfSat42	CAGCAACGTTAAAAGCCAAAACAACTTGAATTATTACTTTTCTTACGTAAAGTTCTCTAAGGATTTCAAAAATGTCCCAATTTTTCATGTAGAGTTAACACTTTTTGAGATATCGGGCATAATTTGAGAAATGGACTAAAAATTAATAAATTTGTCTCGTAAAAAAATTTTTTT	PQ553340
TfSat43	TAATTTTAATTATTTATTGATCAGATCAGGTCAGGTCAAAAAATATTCTTCATGTTATGTTTAAATGCCTTTGATAAAGAAAATAAAAGTTTTTGTA	PQ553341
TfSat44	ACCTTCAACAACCACTGTCAATTTTCGTAATTATTTTTCTTTAAATTTGTGTTTTATTTGCTCACTGGGGTTCAGTTTAGTAGAAAATTCATAAACAAGATCATCTTGGGAAAGTTTGTTAAAAATAAACTGACGACTGTTTTTGACTTCTTGTTGTCAAAAATGATATTTCTGTGGCATTTGTTTGGTCCTCAACCAATTTTTTTTGTATACGAATTCTAGAATTTTTTTTTTAAATGTGGATGTGGCTGTGTCACACTCACGTGTTGGGTGTCATGCACCTGTCAAGTAATCGCAGGCGTGTTGATTTTAGTCGAAATTCGTTGTTATCGATTCCTGACTATAGGTAAAGTTATAGAAAGTTTGTGACAAAAACACTGAAAACTCAAATATTTTATA…	PQ553342
TfSat45	ATCACTAAATTGGGTCGAAAATTACATTATTTTGTGTTTTCAAAACATTTTAGTACATTTTTTTTTCGATTTTTAAGTAAATTTTGGTCACTTTTGGTTTTCCCAATTCAAAAATAATTTCCCCAATTCCAAATCAATTCCATTACTTAGTTTTATTATTGCTCATCTCTGGCTATTGATTTTATCTGTTTTTTTCTCTTTTTTGTATTATTTATCCTATTTGTTATTCTGTTCCTTTAGGTATTTTTCAACTCTTCTTTTTTTCGATTTTTTATAGTTTATTAGTGGAAACATTTAATTAAAATAAACGACAAAAATCTTTAAAAATCTTTCGACAGAGTTCAACTTTTCCTTAAAGAAAAATTAAATTGCTAAAGCGTACCAAAAA	PQ553343
TfSat46	CCATTTTTTAAAACCACAACCTAAAAGTCCGATGTTTTCTAAGTCCAATGCTTAAATAAGCCATCAACTGCTGAGTTACAATTTTTAAATAGATTGGAAAAATGCAAAAAAATAAAAATTATAAATTTTTCCAATTTTGAAACCACCAAAAGTAAAAAAAATCACAAAATCTCAAGGTGGTAGAGACTGGGAAAAAAATAAAAAAAAAT	PQ553344
TfSat47	ATCTAAACAGGGAAATCATTTCGAAAAATTAGTAGAAGTCTTAAGAAAATCCAAAAAAATTAGAAAACAATAGTTAAAAACAGAGGTAATCAAAAAAAAACTTTATAGATAGATAAATATTAATCCATAGCAGAAAAAAAAATTATAATATTCACAGGAAATTTCTCACCTCAATTAAAAGAAATCTACAGTAAATATTTAAATCATGGAAAATATTTTGAAAACTTAATAGAACTCTTAAGGAAAGCATGAGGAAATGCAAAGAAATAAAAAAATACAGTTAGAACCAAAGAAAACAAAAAAAATCTTTATAGATAAACAAATATTATTGTATAGATAGTTAAAAAGATTTCTTCTTTAAAAATCTGCAGTAGATACCTATTTAAATTTCTTTATAGA…	PQ553345
TfSat48	TAATTTTCTAAAGATTTCCTATTTTTTCATTCTCTTATTTTTTCAATTTGTTAATTTTTCTATGTTTTAGTTTCAGGCGTTCATTTACTTCATTTCTCAAAGTTTCAGGTTCACAATTTCTCTCTTTCTCAATTTTTCAGTCCCTCTGTGTCTTTGTCTTAACCTAAATTAACTCAGTTTCTTAGCTTTTCACTCTTAAAATGTCAAAGTTTTAGTTACTAATATTTTTGGTCTTTTTCTAAGTTTCCCTTCAATCGCACAATTTTTTAATTTATAAAGTTTTTCAGTTTCAGGCTTCCAGTATCTCAAAGTTTCAGTTAAGTTTACCAGCTTTTCAGTTCAGTTTTCAGGATTTCCTTTTTTTCGAAGTTTGTCAGCTTTTCAGTCACTCCGTGTAT	PQ553346
TfSat49	GTTATTTTTTAGTTCTTTGAAAAAAGTCTTTCTTCTACTACATTAAGATTTGTGTTATCTAAAGTAAAATGAGCTCAGGATTCCAAATCTGCAAGAATTATTTCGCTACGACTAATATTTTTGAAGTTATTGTCAAAAATTTATTTATCTTTCAGTGAAACTCAATCACTTTATTTTGTTGCTTTGGAAAAAAACTTACAAGATTAGTTTGGCCAAAATCATTGTTTTCTTACGTAAAATGGTCAGACTAATCCAAATCTGCAAAAGATTTTCAGTTGCGAACTTTACTTTTAGAAATATCGTCAAAATTCTAGCTTTCGCCTGACAAAATTCGAAATTTT	PQ553347
TfSat50	GTTTTAAAATATTAAAATGCGAACTCTTTGCATTGGACTTTTTAAATGTTTTAATATTTAAAGGTCAATAATGTACTTACCAATTCTTAAAATAAATGATGGTAAGTATAGTCTTAACTGTATATTACAAGTCAGGTCAAGTCAAGTCAAAACACAAGAATAAAATTGGCAAAGAAATTATTAGTCAACATAACCAAAAAATTAAACCTACAATTCTTATACACAATAACCCAGCGAGTTTGTAAATTCCATTATTGGCAATTAA	PQ553348
TfSat51	TGAAAAAAATTTCATCTTTTAATAATCATTTTATTTTTTATAAAAAATTTTTTTTAGGAGAATTGTATATGACTTAGTTATGCCACTGTATTTTTTCATTTTTGAACGTTATGTTAACGTTAAGTTCAAATTGCATAAAAAATATCACATAAAAAGCAACAATATAAATGATTTGAAAAAGAATTCCTGGTCATTTAAAAATAAAA	PQ553349
TfSat52	CTTTTTACACATTACTTTTTATTTTAAGTCTCAATCGTTCCAATAAATAAATACAAAAAATGTGTTGTAAAATTGGTGGATGCGCCGGGAAATATTTTTATATTAACTATTTTAATTTTATTATTAGGCTTTTTAAACACAAAAAACTTAAAAATTACTTAGTCCAGAAGCATAACGTCCTCAAAAACTAGAAACAAATATGATTAGTTTTTGAAAGAAATCTGTGATCAATTTATTACAATAGGAAAGTTACTGTAACAATTGTAAAAAAAACATAAAAGTTGTCTAATTTAGTGAATGAATGATAATTTGGAAAAAACAATTTTCGACTTAAATTATTCTACTCATTGATATG	PQ553350
TfSat53	AAATCCATCTCTAGCCGAAACTATAACTCTGATTAATTCCTAGTTTGCACTGTTCAAGAGGTAATTAAACATAGATTTTGGCAGTTTTTTACTTTTTGTTGTGGGACCCATAGTTGTCGAGAAAAAAGCGTTTAAAATTTTGACAAATTCAATTTTTGGCTTTTTTTAACCATCCCAAGAAAGTAATCAATATCTATAAAAATGTAAATCAGAATTAAAAACTATTATACTCCGCTTATGTAAAATGTTCTGGGGAGTCGATTGGCGTCAAGCAAAATACAAAATTCTTTATGGTTTGGAAGATATTGACCGATCAAAATGACCGTTTTCGAGTAGCAAATTTTTTATTTGAAAAACACGAATACTTTT	PQ553351
TfSat54	GATACTTCTAAACCTACTGACTGCGCCAATTAAAATTTTTTTTTAGTTTTTTTATCATTTTGTGTAATTTCAAAGATTTTTTCTTAAAGTAAATTGTTTTGTTGACTTTTTAAGCCAATAACTCACTCAATATTCATTATAAAACGAAATTTATATATTTTTTTGCTTCCACTCGAGTCCTGTATTAGTTTTTATTAAAATAAAACAAAAAACAA	PQ553352
TfSat55	GCATACAAATTTGGTTGGAACTGGCATAGTGTTGAGGAAGAAAAAGATGTTTCTATACTATGGTGGTTTAATGTATGAAGTATAAATAATTGTGATCTTTATTTACAAAAAAATATCTTTGTAAAAACCTACGTACCAAAGTAGTACTTAACTAATTATACTTGTGGGTTCTAAGGACCAATGTTTTCGCCAAGTCATTGAACATACTTTAGGGGACAATTTCTCCCTTCAATATCTGTTTCACCTTTACATTTAGG	PQ553353
TfSat56	AATTTTTTTTTTCTTAATTTAAAACAAAAATGATTTTTTTTGTTTGTTATTTTATTATAATTTCAAATAAATCTTCGTGTTATTTGTTCTCCTGAAATTGCTAATTTGTGCTGAAAATTTGCAATTCTTGAACGTTTCAGAGGCATTATAACGACAAAAATGAGAGAAGGTATTCAAACTTAGAAAAAAAAGTTTCAGTAATCCTGAAATTTATACTTTTTTGAGTTCAGGTAATTCTAATACTGCCGCTTTTAAAATCT	PQ553354
TfSat57	ATCATTACTTGGTAGTAAATCCAGAAAAATTCCAAAAAATCCAGCAATAATTTTCATAATTTCAAATAATTTAAGCTATTTTAATTAAATTCAAAAATGTGTAGAGTGAGTGGCTCTTGTTTTTACTCATCCATCAGAACACTGTTTTTGAGTTTTTTGGGTTTGAGATTTTAACGAAATTCTAGATTAATTCCAATAGTTTCTAATTAATTCTAAAGTAATATTCTGTAATTACAACTAAATTTTCGTAATTCCAAAATAATTATTTC	PQ553355
TfSat58	TTTTTCAACTAATTATTATTATTGAAAATAAGGAAAACTGATTTTTTTAAAGAACTCAAGATAATTTTTTTTAAGATCTTGAAAGTGATTAAGACCTACGACAGTGCTAAAATCTTGAAATGAGATTGATTATTTTTAAAGATCTTTAGAACAAAATTAGAAAATTAGAATTAGAAAGAGTTTTAAAAGCATCAACTGAGAAGAAGCATAATGATGTTCTTGTTACAAGAAATAATCAAGAGTTGAAGAAAACTGATTATTTTAGTATTTTTTCAAGATATAATTTCACTATTTAATGATCTTGAAACAAAAACAAATTGAACAATGTGAAAATGAGAGAAAAGCTATAAAGCTATAAAGAATTCAAATCAATTCGTAATACTTTTAAAAGTTTTAAG	PQ553356
TfSat59	TGACTAACCTAAAATACAATACAAACATGTTTTTTTTAATGGAACACCCTAATTTTTTGCATTTTTTGATGTGGCTAGTTTTTAAGCTAAATTATTAGTTAGTTATTAGTTAGTTAAACACGCTTTTTTTTAAATTTTAAAATGACCTGACTTGACCTGACTTGACC	PQ553357
TfSat60	ATTCCCTTTGGAAAAATAAGTCGTTCAATTGGCCATCAAAAGAAGGGCATTTTTGAAGAATCTAAATGAAGATTTAGATTTTTGATTTTGGAAGAAATAAGTTTATGGTCTATACACTTCTAGAAAATTGCGAATTCTTGCCTCTAATGAAGATAAAATCTCTTTTTCTTTTTCGTTTTATTAAATGACGAAGCCCTTGCAGAAATTACAAAAGTTGGTATGTAAAACTAATCAAACATTCCTTATCACATCTTCAGGATACTATATACAATTTCTTCCTTATCTTCAATAATTTTTTGATTTTTCTTTAAAGTCG	PQ553358
TfSat61	GTTCTCTATTAAATACTGATAATTGCTTATAACAGTTGTTAATTGTTGATAAATTATTATTTAAACTAAGTATTTTTACATTGACATGAAGATTACGTATGTATGAAAAATTTCAGCGAGGTTGGCTATAACCCTTACAAACCCTATAATTTTTT	PQ553359
TfSat62	GTTTTTGTTAAAAACTGTTAAAAATGTATCATATTGTTCATTAAGTATTATTTAAACTAAATATTATTGCATTATCCCGAGATTACGTATATTTGCAAAATTTCAGCTAGTTTGGATAACTTGAATCCTCTCAAGTTTGACTCGCAAAATATGAAACAGACAACAAAGCAAGTTAAATAAAAGCTTTTAAAAATACAGGACTTCAAGACCAATTACTTCAAGTCAGACTAGTTAAGTCACCAAGTAATTGACTAGATTGCAATGTATTGTTTTTTTTTATTTTAATTTTTCGTTTACTGGACTCTTGAACTGATA	PQ553360
TfSat63	AATGCACCTACCTTGTGGCATCTTCTTCTGCTACCGTTTGTAGCAAGACATTAAAAATAAATTAAAACAAAATCAATATTTATTATACCACATATTAATATATGAACAATAAAAATAAAATGCATTTATCGTTATGGCATCTGCGTTTGCTACAGTTTGTAGCAAGAAATTAAAAATAAAGTAAAACAAATAAATCAATACAAATGTCAATAATGTCACATATTCAACATCTCATTGGTGAGGAAAAA	PQ553361
TfSat64	TTAAAAACAGAACCATCCTTGAGAAGAATAGATCTGCGAAATGCAACTCTTTTATAATTTTTAACATGTCTCATCAAACTCTGTGAATTTTGAAGTTTAAATTTAATTAGAATTTTCATATTAATTCAGAAATATAGAATTCTTTTTGAATTAATTAGAATTAGATGTACAAATTTTTAAGATTTAAAGAAAAAATTAAATTAAGTAGAATTAGATGTCCAAATTTTTAAGATTTAGTCGAAAGGAAGTTGAAAAAAGAAACTTAACAAAGTTACAAAAAATATCTAACAAAAA	PQ553362
TfSat65	GACCATTTGGCGACTTCAAAAAAAGTGAGATATTCTGACCGATATCTCAAAAACTATGAGTGCTGTCTAAAAACTGATTACATATTCGGAATCCTTGGACGATTTTGCATAAGAAAGATGTAAATTTGGCCCAATAAGTTGAGTATTGTGGCTTTGAGGCATTATTGTTCTCTGACCAGTCACTGACCAGA	PQ553363
TfSat66	ATTTAAATATTTAATTCATGTGGTAAGACTTTTTGTTGTATTGTCGAGATTTAGAGCACGAGCGAGCGTAGCGAGTGAGTGCCTCCAACTATCGCCAAATGAAACTATTGATTCATAAAAATTAATACTGTGATATAGATTTGGCAATTGGAGTCCGTTCATTGGGCAAACGACGCATGAGAAAGTACAAAATGTAATATAAAATAGCTTTACAAAAAAATTAATTAATTTTCTCTTCAAAAGCGATTTATTCATAAATATTATATTACATTTTTATTTATATTTTAATTGTGGCGTTTCATTTTATACATATTTTTTTATGTAAATAAAATTACGAATCGGGTCACCCACTGGAAATGACGTTTTCAACTTTAATTAAAAAAAATATTT	PQ553364
TfSat67	TTAAAGATGTTGTAAAATTACTTTTAGATAAAGGTGTGAATGCGGATATCCAAGATAATGATGGCAAAGTGCCGATACATTACGCATGTGAAAGTGGAA	PQ553365
TfSat68	AGTATTTAATTTTTTGAACACAGATGGCCAACATTTCTTATGATAAAGATAGAACTATACCAGTTTATAATAGGGAAGAGTGAGAGAGAGACACTGCCATCTAAATAATTTTTTAACTCAGATTTTTAACAACTTCAACTGACAAGGATAGAACTATCAGTTATGTTAGGAAAGAGTGAGAGAGTACAATCAA	PQ553366
TfSat69	CTAAATAGAAATGTTTATTTTTAATATAACTATGTTGTCAGGTCAGGTCAAGTCAGGTTAAAGAAATATCTATAACAATCTTTGAAAAAAGTCAACAGAGGTAATACGTTTCTAACTTGCAAAATATGTTTTATTAAAAGTAAATAGTT	PQ553367
TfSat70	AATTTATTTACGAATTTGGAGACCATTTTCCAGCATTTTTTAAATTTGCCTTAGACTATGGTCCAATTATTTGACCATATTTCCAAATCTAGTAGGCGGAGCTAACTTTAAGTGACAGATTTGGATTCCTCAGATCAAATTACATAAGAAAGTTACTGTTTCCGCTAATTAAAA	PQ553368
TfSat71	TAATACTAAAAATTGCCATTTTATGAAACGTTCAAACGTCTAATGAACTTGAAATTTGCATTATTTAATGTAAAATGAACTGAGGAATCCAAATCTGAACGAATTTTTCAAATGCGACTTGTAGTTTCAGAAATATTGCCAAACAAAGCGATTATTTCAGTAACAAATTTTGA	PQ553369
TfSat72	TCAGGTGGAGTCCTTGTTTGTAATTTAAATGTGTGCTAGAGAATAGATAACATCTACAAAATATCAAAACTCCAACTTTAACTTCTGATGCTCATTTATTATAAGTTTGTTGTGATGCGTAATAAGTTAACGAACGTTTTAAAGTTTCCATTAATTAGTTAATGTGGCATTTAGTTAAAAAAAAAATCTTATCATT	PQ553370
TfSat73	CGCATATTTATAATCTGGAGCAAAATTACTTGGGAGAAGGTGGTGTTTATAAAAATTTAACCGTTTTGAAAAAAATTGAGATTTTGAGAAAACTTAAAAGTGCTATTAAAATAATTTTTAGGTGACCACTTAAGAATTTGTTCATTTTTTGTTACCTTATGTCATTTGAACTTGTTTAAACTTTTTTTCAAAAATTATGAACAAAAAAATTGATTTGGACCAAAATCGAAATTTTTGAAAAAGTACTTTTAAAAATCACTTGAACTACTTAAAATTTAATGAAAACAAGATATTTTTAGATTAAAAATTTTGTCCAAAAACACAATTTTCCAAAAAAGAAAATCCATATATTCTTCTATATTCTACTTGAAATATTCTTAGGTTTTGTTTTAAAATTCA…	PQ553371
TfSat74	ATAACTGTTATTTTCTATTATTTTTGTAAACAAGTTGGTGATTAGTCAACCGATTATTTCTTCCATAACTGTGACAATCTGTTACTGTTATTTTCAAATTAACGAATTTGAAATATAACTGTAATTTTAATTAGTTTTGTAAGTAGTGGAACGATTAATTTTCTACAACAGTTACAACCTGTTACAGTTATTTTCGAAAAACTGTTACTTTTAACAGGTTACAT	PQ553372
TfSat75	AAATGAAATTAACGAAAATGAAAACAAAACAACAATAGAAAAAGACTAAAAAAAGTGGAAAGTAAGTAAAAAAGTAAGAAAAATATGTATTAAAATTGTGTCTATTTTTTGTCGAAATTTTCTTTTGTATGGGTTTATTGAAAAAAAATCTCCACAACTCTTTCTTTCTTTTGCTATCCGGTCCGGTTGGTAGGGGTGTCATTCTTTTTGATTGTGACTGTACTTACCTAGATTGTTGGCACTATCTCACTTAATCCAGTACAAAAATAAAATACAAAATTTTATTATAATAATTTACTTAAATAAGAAAAA	PQ553373
TfSat76	ACGGAAGAAGAAACAGCTGCTACTGGAACTGAAGCTGGTGGAGGTGCTAATGTAAAAGAAACTGAAGCTGCGACAGTTGAAGAAGAAAACACGGAAAAAGAAACACCTGCTACTGGCACTGAAGCTGGTGGAGGTTCTAATATAGAACAAACTGAAGCTTCTCTGAGTGAGGAAGAAAAG	PQ553374
TfSat77	TAATCTTAAGACAAGACTAAGTTTTAACATTTTGAAACAGAAATTCAAGATCGTAAGCATATTTTGAGACAAGTAAATATCTTGAGATTAAGTTGCAATATCTTGAAACAACATAATAGTTTTCAAGAACTTAAGTATTGAGATAATAGAAAGGATTTTAGGAAAAACTAAGTTTTCACATTTTGAAACAGAATTAATTAAAAAACTTGAGTTAGATTTTAACACAAAAAAGTATCTTAAGATTAAGTTGTATCTTGTAATATCTTGAAACAACAATATTGGTTTCTAGAACTTAAATATAAGGAAAATAGAA	PQ553375
TfSat78	GATAAGAAAAGGGTTTTTCTGATGTAAAATGAGGCACGGAATATAATTCTGACAAAATTTATTAGCTACGACAACTAGTTACCCAAATATCGTTAAAAAACACTAAGCGGTGGATTCACCATTATACCTATAGGGCATTTGTTTTGGTATTCCTGGACAAAATTTCGCAATTCAGTGCAACGCCAAGCTCCAATTTCGTTTAAAGTCACTCGCTGAGCTTATTTTTTCTGTTAGATTACTTACAACTTCAATTTTTCTGTTCGGCATACTTGCACTTATCACA	PQ553376
TfSat79	ACAGCCAAAAATTCAACCATCCCGCACGTCCATAAGACAATAAATTTAATCTTTTTTTAAAGCAAAATTATTTTTTTATTGTGTTGTAATACTTGTAATACAATGCCCTATTTACTAGAGGATTTATTAGGGATTTAGGGATTGCTTATTTAGGTGCTTACTTTTGTTCTTGCAATTTTTGAATTATTTTCATTGTAGATAATTTATTACTTTTTTTTAAAGAGTCCTACAAAAAAGAATCTAATTTATCAAAGTTGTAAATGTGTTCCTTCTTTATAAAAATTAACTGTTCTTTTATGGATTTAAATACCATAGATGTTTGGTCAGGTCAGGTCAACTGTGAGAACTATGATTTTTTAAACTTTTTCATTAAAATCGGTAAAAAATCTTGCCAGTAAA…	PQ553377
TfSat80	TTTTCATAGCAAATTGGGAAAACAAATTTAATTTCAATTTTTCATTGCCGATTGGGGGAAACAAATTTTTTCTGACATTTTTTTTTCATATTGACAGCTGTCAGAATTAGTTGTCACGTTGAATTTAAACTAATTTTCATCGCCACTTGCGGAAACAAACTTAATTTAACTAATAATCCGAATTCTTTTACGTTCATATGACAGTTGTGGAATGTCAAAATTATTCAAATTTTATAATTTGATATTTTAAAATAT	PQ553378
TfSat81	GTCAACAAGATTTGTTTTAATGAAATTTTGCGCTATTTTGGCTCTTAAAATTATTCATTCATTCAGTTTAGCCGACTCGAAACCAAATGATAGGCGTAATAACGCTCCAGTGGCGGCTCGTTCAAAAATTGACAAGAAAATT	PQ553379
TfSat82	TTATTGGAATTTTTCGGAAATGACTGAAACTCCTTTAGATTCTTTTAGTAGTTATCTGAGATTACTTGGAACGGAAATTACGACGAATTTTTGGAACTATCTGAATTCATTTGGAAATATAGAAACTAATTTGGAATTACAAAAATTAAGTTAGAATTACTGGAATTAATGTAGAATTAATGCAATTAATCTGCAGTTACTGTAAACTATTGGAATTATTAGAATCTTTGTGAAATTTTTGGGAATTACTGATTATTGGAATTAGAATTAAAATTAGAATTGGAAGAAA	PQ553380
TfSat83	ATTACATTTAGCCGAGTTACAGCAAACTGCCACGTGGGTTAGAAAGTGTTTGCTGAAATCATGCGATTTTTTGGCCTTACCGTCAAAATGCGAACTCAAAAATTGTTTTGGGCTTCATATTTCAACAGAGCGGATCAAAATACACAACATGTATAAATTTTATTAAAATTGA	PQ553381
TfSat84	GGTAGATTTTTCTAAATCCTTTATTATTAGATACAAAGAAATTTTCTTTACCTCAAGTATATTTACCTTTTTTAGTTTGAGTTCTAAGGCAGATTGTTTTTTTTACTAAATAATTTTCAAAAATTCGATAGTGTTCATAACAATTAGATAATAAACACCATTAGTA	PQ553382
TfSat85	TCTTGTTGGAAAGTTTAATAAACAATAGAAAATTAACATTATTTCGAAAATCTTTAATTAAAATAATTGAGCAAAACCATGTCGATAAAATATTCGTCAGGAATGACTTTATCAACATGGTGGGACTAGAAATTGACCGAAATATAGTTGTACCATGTCGATAAAAAATCGTAATTAATTTTTAATTGCCTTAAGACTGTCACAACTTGTATAAAATTCTGAAACAAATTAATTATTTGAACAAAACACTTCAAAACTACTTTATTGTTGTGGTAAGACTACAAAATAAAAAAAATT	PQ553383
TfSat86	GTAATTTAATTTTTTTTATATTTCGCACTATAAACTGTTTTGTTTTTTATTATTCACTGTTTTATGCACCTTTTGTTAAAATAATCTGAGAAATTATAAAATAATAAATAACAACTTTCATATTTTGTTTTTATAACTTATATCATATATTGTTTTAATTCACGAATTTTGAAATAAAATTGAAGTGTTTCCCATTTTATTACGAACTGTTTTTTTTAATTTTATATTTGCATTAGCTGTATTATGATAACACAGAATTTTAAATAAACATATTATTTTTCTTGTGAAATATCTACTCCTTCACAAGATTTTTGTT	PQ553384
TfSat87	GATTTCCAATATCCTTTATCATTTGCTTTTTTTAACTTCAATCTTCTATCTTCTGTTTTCTTTCACTCTTATTTGTTCAGTTTTCTTGCCTTCCATTCACTATTTACTAGTCTTCTATAATCTATTTTTTACCATCTCTCTGTTTTCTGTTTTTTCTTTTCAGTTTATCTTTCATCCTGCTCTCTCTTCTACATTATCTTTATTTTCTATCTTTTATTTCCAACAGTTAAAAAAGAAAAAAGAAGAGAAGAGAAAAGAGAAG	PQ553385
TfSat88	CGAACTAAAATTTTTGAAGATGGCAAAAATAATGTAATTTTGAGTGATTCTTTGCCCTGTTCGGAGAAATTTCGTGCAAAATTAAGATTTCAACCTAAAATCTTTCCTAAAACTACTAAACAGGCAAAAATAATATCATTTCTTGCAAATAATTGCGATTCTGGCTGAAAAATCTGTTAGCACTCAAAATTGGTAAAAATAATGTAATTTTCAATTCAATTTAGGGATTTTTCGAGCTGGTTTAGCGAAATCTCGTGACGAAATTCAGTTTTTAGCTTGAAAACGGCTTGGAAAAGTAAAAAATATCGGTAATATTTCGTAAGATAACTATAAAAGGAAAAAAATCACATTTGTCATAATTCAATGATTTTTGGCTTATATTTTTACAAAATTTTGTAC…	PQ553386
TfSat89	TGCAAATTTGTAAAAAGGAGAAATAAGAAGGAAAATAAAAAGAGGTTTGATGGCCCGAAACTAACTTTTTCAGTCACACATACACTATTTTTTCTATTACTGACAAGTCAATTTAATTTTTTGAAGGTAACTTTTTTTTATTAAAGCAGTCAATTATGACTATAAATATGGAGAAACT	PQ553387
TfSat90	AAAGACTCAACTTAAAACTTATGATTTTCAAAGCATTTTTCTCGATCTTATTAATTCTGGAAACGAAATTCCGTGGTTTCAATTATACAGGGTTAGTCTACTAAAAGGATTTTTTACTATATCTCAAATAATTAATTATAAAAAATTGTAGAAAAATTCTGAAAAAAATCACAGATTTTGAGAGAAATGTAAAGCATTTAACATTATTCTAAATTATGTGCGATTATTAATTTTTGAGATATAGTAAAAATATACTTTTAGTAGTCTTATCCTGTAGAATCAAA	PQ553388
TfSat91	TCTAAGTATAATTGAAGGTGTGCTACTTTCTTGCTACTTCAAGGTTGAAAGGGCATTCAAAATATTATAAAATATTAAAGTCTTAAAAATCCAGCTCTGCGAATTAGTTGCAAAGTTTGTTTCTTCACAAATTTTGAAGATTTTTTTT	PQ553389
TfSat92	CCTCTGTTTTAGTGTTAATTGGAGATTCTAAAAGTTTGACTAAAAAACCCAGATCTCATTAAAAAATTGTGTAATTGGCGCAGTCGGTAGATTTTTTATTACCTTTCCTAAAATCGAACGTTTAATTTTCCAATATATTTTTATTTCCAAAATGATCTTTTTACAAGTAATTTCAGCGATTTAGGTGAAAGAAAATCTTGTTTATATTAAAAAAAATTGTAATTGGCGCAGTCAGTAGGCAATTTTTTTGCCCTTTTTTC	PQ553390
TfSat93	AGTTCTATTCTTTTTGACATTTTTTTTTTCATATTCGTTTTGCCTACATTATGACTTTTTCCAATTTTTTTTCCAATGCTTTGTAATTTTTTTAATTTTTCTACTTTTTTTACTTTATTTGTTTTCAACACCTTTTTGTTTTGTTTAAGTTTATTTTCTTCTACTTACTTACACATTAATTCAATAATAATGATAATACTTTTAATAATAATACTTTATTAACAAAAACCTCTTTTTTACAAAGAATGTACAACAAAAAAATATAATTAAAAATAAAAATAAATAAATAGTACATACACAAATACCTTATCTCTGGTACGTATAATTTGTTTACTTTATTTTCTATCCCACGATAGTTTTGTTTGGGTATATCTCAAT	PQ553391
TfSat94	TATGTTAGATCATTAGTTCCTTGATTTCTAATTCGAGAAGATTTAAAGGAATTAGAAATTTCATTCAATTTTGATTCTAGATTCCAAAGTCTAGAAGTTTTAGACAAATTTTTAGAAAAATATTAAAGTTTTAAGGAAATTGAGGAAAAAAAGTGTTGAGAGAGGAGTAAGTTACGAAAGGGAGTGATTTCTAATCATTTTCTAAATCCACAAAAAAATTAAT	PQ553392
TfSat95	CAACTATTCTGTTACATTATTTTGTTATTTATTTTATTTCCTTCAAAGGATATTAAGAAAAAAATTTCTGGGTAGGGTATCGAATCCAAAACTCTTGAACTGGTGTTGCTTTTTATCAGCAGATTATCCTTTTATCAAAAAGTAAAAGGATAATATATGAAGGATAACAAAGTAAAAGTAAACTAAAACAGTTTACTTTCATTGAACAAAAAATCAACTTTAAGAAAAAT	PQ553393
TfSat96	TATTAGAAAAAATGTGAAAAAATTAAAAATCAATCTGAAAGCTCGAAACTATACTTTCGATTTTATTGACTTTTCTGTCTGTTGGCTACATTAAAAATAAATTCAATAGTTCAGTAGTTTATTGGAAACTGAAAATGTTAGGTAAAAGTTGTCAAGTCATGAAGAACTTTTTT	PQ553394
TfSat97	TGATGCAGAATTGTCTCAAGATTTCAAATATGTAACCAGTTTTTTTGTATCGTTTCTGGTTTTCGAGAAAACGGCCATTTGTTAAGGTTGGTTCTTCCAAAAATTATTGTCCCTAGTCAAGTGCCAAAACTATAATTTCTCAAGGCCATATAAACTAACATTTTAAACAAAAAACGAATTTATC	PQ553395
TfSat98	TGGAATTTGTTCTCGTTTGATGTTCTAACATTCAGCAAAAAGTTGAAATGAAATAGAATCTTAATTTTCCCCAGTAAAACATTATAAAAAAGATAAGAGTAATTAGAATTTCTTCTTGTCTCGCGTTCTAATATTGATCCAAAGATAACTAAGTCTTCATCTCGCAAGAGTTTTCTATGATCATCGAAAAATAGAGAAGTTTTTTACAAAATTCTAATCTTCATTTCTTCAATAAATCATTAGAAAGTGTTTTTTAAGATACTTTAGAATTTGTTTTTTTT	PQ553396
TfSat99	GGGACTCCTTACATATTTAAAATTCTAAAATTGTTTTGTAATTTTTCTTTGCAAATTTCTAAAATTTTACGCTAGAAATTGGTTTTCAAATTGTTGTGGTTAGTTTTACATTTCTTGACTCAAACTTCTGGGTGTTAAGCCAGAAAATCTTCTAAAATTTTCAAAAAATCGACTCTCAAATGATTTTTGTTTAATGTTTATTACAATGGGCATATTATTATTTTTTAAAAATTTATTTAGGTATGTCACGAAATTAGTATCTACGGTTTTTGTAAAAATAAATTATTTTATGACATTTAAAGGTCACAACTGGACTTTTCCAACTCGTT	PQ553397
TfSat100	TGAGTTCAGAGGAAATACAGAAAGAAATAACACAGAATCAACCGATTTGATTCCGAGAAGTACTAACATCACAACATCGGTAGTTGAGAACCTTATTGAAACAACATTAACTCCATTGACGGATCCTGTTTCTACATTTAACGATATTAAGACGACAAAGAAAATGGACGATCACATATTGTTGACAAGTACTGTTCCAAGTATGACTATTGACACAGGAAGCGGAAGTGGAGACGGCAAAATTTCTGATGATGA	PQ553398
TfSat101	TAAATTCTAATTTTATTTTTAATTTCAGGTGGGGAAGAAGAAGATGCCATAAAGGTAAGTGCAGATTTTTTAAATGTCAAGTGAAGTGTTAGTGATAGTGTGAGTGCCAAATTTTTAGAACACAGTAAGTACTTCATAAAATTTTTAAACT	PQ553399
TfSat102	TGGTTTCAATCGAAGAAAACTTTCATCATTACTGTCTTACTTTTTGGAGTTATTTTATTAAAATTGGAGTTTTCTAACGTAAAACGAGCCACAGAATTCAAATATGCAAGAATCTAGTCGCTAGGACTAAACTTTTGGAAAATATCGTCAAAAGTTTGCTTCAATTGAAAATCTTTCAAAAGTGGCTTATTTTTTTGAAGATTTTTTTCAAAAATAGACGAAATATATGTAAAATGACCAGATAAACTCAGATTTGACAAAAAAGAGAACGTTTATTCAAAAAAATTTATACTAGAGACCAAAAAACATTAGGTGTGGTTGGTCTT	PQ553400
TfSat103	CAGTTTCAAATGTTTGATTCAGCTTTTTCAGTTTCTGAAGCTAAAATCTACATTCTATCATCTTTTCAAATTTCTAACATAAAGGATTAGATTTTAAATTTTTAAAACGGACATTTTAGCATATATCTAGCAACAAGGTTGTGAAATGCTTACACTTTAATTCATTCATTTCAAAGATTTACGTTAGAATCTATCATCTGATAGAAGTTCTTCTAAAATTAGGAATCGGAAATTTTTGGAATGAGCTTTTTAATTTTCAAACAAAATGTTCAAGTACATCCTTTTCTAAACTTCTACACAAGTTGTTTTAATAATTTTTAAGATGATGAGCTTAAGTTTCAAAAAATTGATTCTCTAAATACCTATGCCCAAGTTCTAAACTTCTCAACTTTTACTAAT…	PQ553401
TfSat104	CCAGCTGTCCAAATTTGATCAAAATTGCCCAAAAAATGGCCGAGAAAATTAATTTTTTCCAAAATTTTTGTCAAAATTTGGAATTAACTGGAAAATGCCAATTTTGGGGCAATCTAGACACTCAACAAAGTCCGAACCAATCTTATCTAACGTAAAATTGTCTCACGATTTCAAATCTGTCATTATTTTTTACATACGATTGGTACTTTTCGAGTAATCGCTAAAAAATCGTTCATTTTTGAAAAAAATACATCACTTATCACACAATTTCGACAATAATTCCAAAACGGCACTACGGATCTAAACAATTTTTGTAATTTGAAACTGGTCGGTCACTTTACG	PQ553402
TfSat105	GTAATTATAACGATTTCATGGATTTCAACGAAGCTTCAGCTGAGTAATGTCTGTTTCAAAACTATAAAAACAAATGTCACATTTCACAGTTGCTTTTCTCTTTTATTAGTGACTAGAGTCCAACACATAATCACACGAAAACAGAAAATTTTAATTTGTGTTCTATTTGTCGCCAAAAAATGTAAATGCGCTCTTGTCATTTTTTTTATAGTTTTGAAATAATTACCAAAGGCCGGGTATAGCTAGGGTTACTAAATACTAAAATTGCAACTGCACAAAAATTTGCACAATTTTTTATGAATCTTACTCTCGGATTTACTCAAATATTTTTTTTTAATATGAAATTTGGAAGAAAACGATTTGTACAAATTCGTTAAAAACATGAATAAAATTAAAATG…	PQ553403
TfSat106	TGTTGAGAATTAAATTTAATTAAAAAAAGGTTACTACAGCTGATTCTGCTTTAAGACAATGAACTATTTTTTAAAATTTCATTTTAAATTTCAGACACTATAACTAAATAAAGGAAAAAAAAGAACAAAGATGCTTAGAATTAAGTTTCCTTCACAAAAGGTTACTACAAAAAATGTTGTGTTTTAAATCAATGAACAAATTAGGATTTTTTCTTAAATATGTCTCAGTAAAATCTAACTTTGGTTGTTTTTTATCTTTATTTTTACATATTGCATAAAAAATAAATATTGCATTTGTACGAGTACGTTTTAATGACCTCGAAAGCGAAAGGAAAAGAAAAAGGAAAAAAAAAGAACAAACA	PQ553404
TfSat107	GGCCGATTTTTTAATAATTACCAAATTATTTTGATATTTTGTTGTTATTTTACCCCTACAGCCTAAATATTCACCAACTTATTCTATTGGCGATATGTAATTTTTATGTTACCTAAAACTTAAACACTGATATTTCAGAATGACTTTTTCAACCCAATATCATCAATTCTTATGTGCTTGATTATCACTGTTTATCACCAACTTCCACAAATTATATATCAACTTTCATTACTTCATCAGTATTATCCATTTTTCTTCAGGCTTAC	PQ553405
TfSat108	GAGGTCCAAGTCCTGCAAAAACGGCAGGAATTTGAAGCTAGTTTTAACGATTTTTTGAGCATTTATTTAGTGATAAATCATTTTAACTGTAAACTACAGACAGCAGGAATCGCAATCCTGCAA	PQ553406
TfSat109	TTTACAAAAATTGATGAAAGTCGAAAAAAATTTTTGAAACTTAAGTAATATATCAATGTATTAACACTTTCTCATAAATACATACAAGGTATGTCACTGATGAGTATATTTTTTGTCTATACCTACATTCATAGTTGCCAATTTAATTATTTCTTTCATTTTCTTTCAAAAATTCAAAAAAATAAGTAAAACATAAATGACTTCCAAGCGATATAACAGATAGAAGCAAAAGACTATGTTCTAAAAATTCACTATTTTTCAGTGTATTTACTTTACAATTCTAGTTAACCGTTACAAAATCATGATTAAGTTTTATTATTTAAAGAGAAACTAAGAATTATAAGCAAAGGTCAGATTTT	PQ553407
TfSat110	TATCGTCTTGTATAATAAAATGCTCCAGTTTAAAATAACTAAAATAAAAAAATCTACAGCAGCTGTTAAACTATTTCTTCATCAGATAAAATGTTTTAAATTCATTCTATTCAATCAAATTTACATCATATTAATTTGAAAAGTTAATAACTTTTTTCTCTTAAACTTAAAGTTGTATTATACACGACGCTAAAGATTGTTTATCTACGAGTGACAAAGTTAAAGTCTT	PQ553408
TfSat111	ACCAGGATCACAGGAACGCAAAAAGGTCTTTAACTTTAAAGATCTCTTTACATTCATGTGATCCTGATACTGATTTCAGTTTTAAAATTTTGCAAAATTTGAAAATATTATTCGG	PQ553409
TfSat112	TAATATTATAATTCAGATTAGCTTCCGGTTTTCACTGTTCGATAGAAAATTAAACACAAATTTTGAGGACGTTTTTATTTTTTCCATAGAACTTATAGTTTTCGAAAAAATCGCGTTCAAACTTTCCAAAATTAAATTTGAAAATTCGTAAATTTTTAAAAATTATTTACAGCCAAGCCATAAATCTCCATTACAATTTTTTAAATAAAACTTACGTAAAATGTTCCGAGAAATCGATGGGTGCCAACAAAATTGGTAAAAGTTTGAGGTTTTCTTTATCAAAGTTAAAGAAAATCTCATAACTTTAAATCCAACTGTAGA	PQ553410
TfSat113	CTGAAAGTGTTTGATATACAACAGGAATAACAGAATTGCCAACTTTTTCACGAAATTTCTTGAAATCAGTAAGTTTCAGGCTCAAAACTAATCAATGTAATTAATTCAATGTAGTTTTACATAATTCGGCATTTTTTTTTAGTTTGTTTCATCAAAATCTCTTAAATAATAAAACAAGTTGTTGGGATCCACACTTGACCTGAAATTTTTAAACGTTAACACGCATCTTTATTATTCAACAGTTATAACTACAGATCGAAAATAATGTTTGCAACACTG	PQ553411
TfSat114	TTCAATTAATAATTTGCCCGGCGCATCCACCATTTTTCAAAAACATATTTTTTAAAATGTTAAAATGTTTATTACTTATTTTTTGTAGCTCTTTCAAGAAACTTAAATAGATAGTTTATTGTCAGGTTTTTACTTATTTATGACTAGGTTTGTCTATTTGTTTAACTGCTAAATAA	PQ553412
TfSat115	ATTATAAATTAGTTTTTTTTGCTTCTCTAGGACTAAAAGTTACCGAGATATCAACCAAAGTTTAGTTGGTTAATAAGTTAACCAACCAATTTTTTTTTTTAGGAAAATACGAAAACCTGCCTAAGAACTTGGTTTTCTAACGTAAATTTTCCGAGA	PQ553413
TfSat116	AAAAAAAAATACTGTCACTCTAAACAAATCAGGTAAAAGTTGGCCATGGAACTGTGACAGTTTACACCCTGTTACCATTGTTACCAAATTAAATTCATAGTAACTGATAAAACAGTTTGTCCAACTTGATAAAAATGAAATTGTTACACACAATTAATT	PQ553414
TfSat117	CTTTAGGTAAGTTTGAACTTTTTTTTATATTGGTGAAAGTCCTACTTTTCTAAGATTCTTAGTTTTTATGTAATAATTAAAAAAAAGCGTCTACTTAAATAATTTTTTAATCCAAAATCAAGGCTGATGCAATAATTTTATGAAAAATATGGCTTTAAATGTGTAAAGTTTAAGTTTTTCCCTCAGTTTGTATAAGTTTATCAATCACAAAGAAAAAAAATAACCGCCTACTTTAATTATAAGTTCAAATTCTCGGTATCTTAGAGAAGTTATTAAAGAAAAACGAAAATAATTTTTGAAC	PQ553415
TfSat118	GAAACAAACAAAACAGAAATCAAAAAATTAAAACAACAAAACTAAAAATATTGACAGAAGTGATGAAATCTACAAATAAAGAAAATATAAATTGAGAAGAACAAAAAATGATTTAATTTACCTAAAACAACTTAATAAATGAATCAATTAAAAGTACGATAACTGAAACTGAAATACTTAAAGTAAATAAAATAGTGAGAATAAAAACAAGATAAAAAATGGGAAGAAAGAAAAAAAACTTTTTTTTGGAACAGCTTTTATTAAATTGTGTAAAGTTAACGCAAAACTGAACACAAAAAAGT	PQ553416
TfSat119	CTGATTCATTAATTAATTATGACAGTCTTTTATCAAAAGTTTTCTCAGACGACTCGAATTCGGTCAGGTCAGGTCAAGTCAGGTCAGGTCAAACATTATTAATTAATAAATTAACATTAAAAAATATCTTAGACAAGTACATAATATCTCCAAATTTAATGTCATGGAAAATTATATTGTTTTTTTCAGTCTTATTTTGTCTCAAAGTCAATCAAAACTTACTTCATTGTAGGTAATACTAATTTTTTGTTTCGAGATTTTTCGTCTTATTACCTACTGGAAAATTTGTCAAAATAAGTTTTCAGTTTTTTTGACATAGTTAA	PQ553417
TfSat120	GCATGTCGCAGAAAAATTTTAAAAACATTAATTTTGTAACTCAATTTCCAAGGAAAACCTCCGAAAAGCTCGCCTTGTTTGCGTACTACTATTATTTTTTCATAAGTAACCCAGCAAGTTACCATGCCCTCAATCGAATGAACCGATT	PQ553418
TfSat121	ACACATCTGATGGCACACCTAAAATCTCACCACCAAAAACGATATTTAGGCCTCAACTTCAAGCGCCTAAAAATTATACAAAGTCTGATAAGAAACCAGAGACTCCAGATGTTTATTTTTCATCTGTGTTTACCACTCCACCAAGTGATAAAAGTTCTGAAAATAAACCCACTACACCTCAAAAGGCGGATAACTCTGATTTTTTCGTGGAAGTTTCTACTTTGCCTAATGGTAAACAAGGAGAAGAAACACCCACAGAACTTCCACCAACACAAGAAGACACCACATTTTTTGAAGATAGTACAAGACCAAGTGATAAAGAAAATGATGAAGTACCAAGTTTAGATGAAGAAACTACGTCTTTGAATGTTGACATTAGTACTGTACCCACGAATGATG…	PQ553419
TfSat122	TCTATATTACTTCTTCTTAAAAAAATATTATGGCCTCTAGTTAGAAAGAAAGATTTAGTAGTGCTTCTCAATGTCCTTAAAAATTTGAATTTGAATTTGCAAAAAGTAAAAAAAGTCTAAACTTGAAAAAAGATTTTGTTCTTCGTTGTAAGCTTTTAGAAAACTGTAAATATTTATTGAAAGCAGATCCTTAAAAAACTGGAGGTTCTAAAACTTGGAAGGTTTCTCGAAAGAGCTAAGAAAATCTAAATCAGTTACCAATTTCCTAAAAGCAATTATAAGACCTACTGTTTCTCCATTAAAAAAAAT	PQ553420
TfSat123	GGAACAAGACGAAAAATTAGGAAAAATAAATCACGAAAGAATCGAAGAAAGACAAAACGGAAGATTGCAGCGTCCAGAAGAAACAACTCAAGAGAGAAATACAGAAGACAGAAGAAGTAAAATTGAAGAAGGTGATGCTCACCACAGATTTAATCCAGAATTTCTGAATAAACAACACGAAAAACTAAGAAGAGTGAATGAAGATCGTCCAGAAAATATAAATCAAGGAAGAAATGACCATCGACTTGAGGAAGACAGAAGAGGCCGTTTCTTAAATGAAGAATCAAGATTAGAAGAACATTTCAAAGACAGCAGGTTTGGTCAGAACACAGAATTTAGAAGAAGATTTAATGAAAATAATCCACGTAATGGTTTAGACAACAGTTTAAATCGTGACAA…	PQ553421
TfSat124	TATCTCCAAAATCTGTGTTTAACCTTCTATTGGACAACAAAAACCGGAAATTAATCGGATATAGTGCCTGCTACAAATGGTTTTAAATTTATAACACTTTCTTCAACTCAACTGGTAAAATCTCAAATGATGGCGTCAATCGATTTCCCGGAACATTTTACATAACTATTTTTTACATAACACGATTTTCTCGAGAACTATAAGTCCTACGAAAAAAAACAATAA	PQ553422
TfSat125	TTGAAACAGAATTTTCAAATGTGAGACATCGTTTCTAATAAATGAGAGCCACTTTTTGTCCATTTTTCTAATTAAAAACACGTGGTTTACGCCTACTTGTCACAATACAGGGTGTAGAGAATTTTGGAAAATTTTGATTTTTTTCGAAACTTTTTGAGACT	PQ553423
TfSat126	GAGATATTTTAAAACGCTCCCCTACGGAAACTATAAATCCGGTTAGCTTCCGGTTTTCACTATTCGATAGATAATTAAAAGGGGAATGCGATGGTATTTTTATTTTTTCAGTCGGACAAGAAAAACTGGAGTTTTTTCCTTAGCAAAAATATGGTACTTCAAACGCTTCTCTAGCCGATACATCTATGAAG	PQ553424
TfSat127	AAGGATTCTGATTCTGTAATTAGATTTAACGTGCGGGTAAAAGTTTTCGAGATATCGGCAAAAATTCCTCCGATTATTTTGCAACTCGCTAAAAAATCAAGCCTCCAAATTATATTTTTTTAAAGCCGAATAAACTTATAAATTAAACCAAAAAAAAAACTTTTCTTATGCAAAAATAGTCAGGGAATTCGATTCTTTAGTCAATTTGAAACTCGAATCGATAATTTCCAAGACGTAGTCCAAAGTTTTTTAGAATTTTTCAAGTGAAGTGATGTCTTTTATAAAGTCTTCAAGTTATAATTTTTTACGGCCTCACAAGTTGCCAAATTAGACCAAAATGTACTTCTTTTTAAAGAAAATTGTCT	PQ553425
TfSat128	GAACGTGTTAGCCCCTTGATTTGCAAAATTTTTACTACTTTGAACTAAAAGTTGCTCTTATTTGATCAGGTCAGGTCAAAAATCATTATAAACCTATATTTTTTTTACTTTTTTGTAATGTGAATTATTAATTTTTCTCTCAAATC	PQ553426
TfSat129	TTTTCAAGTGTCATTCCGTTTAGCAATTTTCCTGATTTTTGCAGAAAACAAAGCTTACCGAAAGAGCTTTTGACTGTAAAAAATAGTGAACCGATAGTCACTAGTTAGGGCAATAACGAATTTGATTGTTTTCTTATATTATCTTCACAATAGAAATTTT	PQ553427
TfSat130	AGCAACTAATTTATTCAAGTTATTGGCATCTGTTATTACTTTAATTCAATTAGATCACACTTGATTTAGATAATCTCGACAATCGGCCAAAATTATAAAAATAATACTATACCTGCCATTAGCACAAATTACGAAAAAATGTCTTTGGA	PQ553428
TfSat131	AACGAACAACAAAATAATTTACTTTAACAAAATATGAAAAATAATTAATTGGCGCAGTCGGTAGGTTTAGTGGTTTATTTCTGTTTTGATTTTTTTAATGTAAAATAATACTGAACGCACTTGGATGCAAAACAATTAACAAATCTTTTATTAT	PQ553429
TfSat132	AACTTAACAGAGTTATTTCCCCTTTTGTTCGAGAAAATAAAAACTTTCTCTTTATTTGCGTTTGAAGCAAAAGTGACGCTCCCTACCGACTGCGCCAATTAAGTTTTGTTAATAACTTAAAAGTGTAACTTCCCTTTTAGTTAAAATAAGTGAGAAAATATAACTTTCTCGACTGTGGATCTTCTTCAGAATTCAAATTTTCGAATTGGAAGGAACATACAGTTATGTGAACCCTACTGACTGCACCAATTAATTTTTTTTT	PQ553430
TfSat133	AATTAATAATCGTGTGAGGGAAGGAAAATTGTCAATTTTGTTATCTAATTTATTCCAAATTATTTAATTCATTTTTGAGCGTAATTTCTTCAACAATAAACTTCACAAAAAATGTCAAGATAAAACAAAAAAATCGTCAGAAAATATTGTTCATTAATTCCTAACCAACTGTTTCCAACAAAAGAATGATTAACGAAATATCGAACTGTCAAAACTTGTTTACGATCATTTTCATTTTGTGTGACTGTACCGGAGGTTATAACAATTTTAATAAAATTTGCATCAATA	PQ553431
TfSat134	TATCTCAACAAAACTACTGCAACGGATATTGTACGAGTATAATCATTTCTTTGTTTATTCACCCCTTTGTTCTTTATTATCACAATTTTTGTTTTTGTAAACGAGTTACTGAATTTATTGAACATTCCAAAACATTGTGAAAATAAATCCATAAAACTTTAAATGGCTGTCACATTTTATTAAAGTACACCTTTGTCTTATAACAATTAAAAAAAATAACTGAAAAAAAAATTACACAGTTAAATTATTAAAAATTTGGGTAATTGAACTTTTAATTTCATTTTTTTT	PQ553432
TfSat135	TGTTCCTTCATTACTCCATTACTCTTCCAAATATTTACAACGTGACTTTTTCTCCTTCTTTCTTCTTCCTTCCACATTCTTCCTGCCTTTTCCTTCTTATCTTTTTTCTTCCTTCTTAAATACTCTCTCCCTTCTTCTTTCTTCTTCAAGAATCTCCCTTCTTCATCCCTTTTTCTTCTTTTCTCATCTT	PQ553433
