# Supplementary material for: Dynamic evolution of satellite DNAs drastically differentiates the genomes of Tribolium sibling species
Source: HighWire-hosted journal article supplement (doi:10.1101/gr.280516.125), 2025-09-16
Supplement: Supplemental_Tables.zip [file Supplemental_Table_S3.xlsx]

## Sheet: Table S3
Supplemental Table S3. Main characteristics of the 135 T. freemani satDNAs identified in this work. The last two columns specify orthologous satDNAs from the sibling species T. castaneum found by BLAST searches against the NCBI GenBank database and repetitive elements from the Repbase database with which T. freemani satDNAs showed partial similarities when searched with the CENSOR tool.
SatDNA superfamily	SatDNA	Repeat unit length1 (bp)	Genome	A+T	Orthologous satDNAs in T. castaneum	Partial similarity to Repbase entries3
			proportion2	content
			(%)	(%)
	TfSat014	166	30.5	69.9
	TfSat02	1106	1.5976	67.3	TCsat155	Sola1-2_BM DNA8-95_AP Transib-N1_CQ Gypsy-6_TrVa-I hAT-104_HM
SF1	TfSat03*	340	5.6957	68.8	Cast76
	TfSat04	112	0.0667	68.7	Cast76
	TfSat05	173	0.0257	71.1	Cast46
	TfSat06	143	0.0472	67.1
	TfSat07	166	0.0285	63.3	Cast86
	TfSat08	120	0.0104	59.2	TCsat175
	TfSat097	122	0.0125	68.9
	TfSat10	145	0.0188	63.4
	TfSat11	266	0.0257	66.5	TCsat135	Gypsy-127_ZM-I
	TfSat12	63	0.0188	46
	TfSat13	63	0.0104	47.6
	TfSat14	204	0.0076	62.3
	TfSat15	164	0.0068	68.3	TCsat235	Rehavkus-1_TC
	TfSat16	178	0.001	70.8
	TfSat17	63	0.0044	57.1		IS3EU-1_TC
	TfSat18	78	0.1459	53.8		Polinton-6_HM
	TfSat19	63	0.0038	58.7
	TfSat20	226	0.257	80.1
	TfSat21	1006	0.0549	58.4		MDR2
	TfSat22	333	0.0014	74.2	Cast96	hAT-N26_Aly rn_364-201_LTR
	TfSat23	167	0.009	70.1		Rehavkus-3_TC
	TfSat24	164	0.0051	61.6
	TfSat25	154	0.0042	65.6	TCsat125
	TfSat26	416	0.0033	78.1		MuDR-2N1_CorFlu DNA6-13_Cgi
	TfSat27	180	0.0033	63.9	Cast66
	TfSat28	362	0.003	71		hAT-N77_OS
	TfSat29	252	0.0029	71.4		ERV1-4_ThAm-I
	TfSat30	182	0.0028	71.4		Helitron-N12D_LMi
	TfSat31	199	0.0028	70.9		Helitron-N68_CGi
SF2	TfSat32	267	0.0027	77.2		Tlr1
	TfSat33	504	0.0022	72.8		Caulimovirus-7_ArHy Daidara-5_AllFus-I Athena-YJ_As
	TfSat34	392	0.0013	75.5		MuDR-34N6_MT
	TfSat35	116	0.0027	85.3
	TfSat36	710	0.0024	69.4
	TfSat37	174	0.0024	79.9
	TfSat38	508	0.0023	73.8
SF3	TfSat39*	355	0.0021	74.6		hATx-3_SM
	TfSat40	185	0.0013	75.7		Sailor-Ar-Adohon
						Gypsy-46_DSuz-I
	TfSat41*	347	0.0015	72.6		Sola2-4_LSal
	TfSat42	174	0.0011	73	TCsat295
	TfSat43	97	0.002	78.4		hAT-131_HM
	TfSat44	744	0.002	69.1		hAT-163_HM
						Gypsy-696_AA-LTR
	TfSat45	388	0.0019	75.8		EnSpm-1_DSuz
						Fanzor1-1_AphGif
	TfSat46	209	0.0019	73.7
	TfSat47	490	0.0018	77.1		MuDR-N16_Rsa Helitron-N21B_Aly
	TfSat48	398	0.0017	70.6		Gypsy-34_Mad-I CER15-1-I_CE
	TfSat49	341	0.0017	71.8		hAT-15_DTa
	TfSat50	265	0.0017	74		LIN10_SM hAT-15_Can
	TfSat51	206	0.0017	80.6		Gypsy-33_DEl-I
	TfSat52	355	0.0016	76.3		MuDR-34N5_MT
	TfSat53	369	0.0016	69.4		Daphne-48_HM
	TfSat54	215	0.0016	77.2
	TfSat55	257	0.0016	68.1		HARB-N17_BOl
	TfSat56	260	0.0016	75.8		Mariner-3_BM
	TfSat57	269	0.0016	75.8		MuDR-N8_RSa
	TfSat58	398	0.0016	77.4		Mariner-85_HM
	TfSat59	167	0.0016	73.1
	TfSat60	316	0.0015	71.5		LIN13_SM
SF4	TfSat61	155	0.0015	74.8		LIN25_SM
	TfSat62	315	0.0013	72.7		hAT-35_HM P-1_CydSpl
	TfSat63	248	0.0015	73		Medea
	TfSat64	294	0.0015	78.6		Transib-7_DAn
	TfSat65	191	0.0015	62.3		Chapaev3-2_HR
	TfSat66	390	0.0014	72.3		hAT-N23_ALy
	TfSat67	99	0.0014	65.7
	TfSat68	193	0.0014	68.9		Gypsy-12_SpEx-LTR
	TfSat69	149	0.0014	75.2
	TfSat70	174	0.0014	68.4		Copia-9_OS-I
	TfSat71	173	0.0013	72.3
	TfSat72	196	0.0013	72.4		DNA2-3_TCa
	TfSat73	470	0.0013	76.6		MuDR-6_TV piggyBac-1_Cgi hATm-1_HM
	TfSat74	224	0.0013	74.1		Copia-23_NVi-I RTEX-61_Cgi
	TfSat75	312	0.0013	74
	TfSat76*	180	0.0013	56.1	TCsat305	MuDR-1_Cba
						MuDR-97_TAe
	TfSat77*	313	0.0013	76.4
	TfSat78	283	0.0012	64.7
	TfSat79	402	0.0012	73.6		DNA-11_HM UroGra-5.2312 Gypsy-13_CySi-LTR
	TfSat80	255	0.0012	73.7
	TfSat81	142	0.0011	64.8
	TfSat82	289	0.0011	74		KolobokE-1_TenNot
	TfSat83	172	0.0011	65.1
	TfSat84	166	0.0011	77.1
	TfSat85	297	0.0011	74.7
	TfSat86	316	0.0011	80.7		Ginger1-1_AP
	TfSat87	262	0.0011	72.1		Gypsy-35_PSt-I
	TfSat88	569	0.0011	72.8		Sola1-5_LMi
	TfSat89	178	0.0011	73
	TfSat90	284	0.001	76.4		hAT-6_RPr KolobokE-1_TC
	TfSat91	148	0.001	71.6
	TfSat92	260	0.001	71.5		Gypsy-19_MiUn-I
	TfSat93	378	0.001	79.4		Gypsy1-SM_LTR hAT-N5B_EL
	TfSat94	223	0.001	74.4		DNA-1_CQ
	TfSat95	230	0.001	74.8
	TfSat96	173	0.001	74.6
	TfSat97	184	0.001	68.5		Chapaev3-3_PM
	TfSat98	281	0.001	74		DNAV-1f_LVa
	TfSat99	329	0.001	74.5
	TfSat100	255	0.001	62.7
	TfSat101	151	0.0153	71.5		BEL-20_SiCu-I Medea
	TfSat102	326	0.0021	71.5		CR1-8_CGi
	TfSat103	563	0.0017	73.7		DNA-1_CQ P-19_HM
	TfSat104	342	0.0031	67.8		MuDR-3_Mad GIZMO2_EI
	TfSat105	419	0.0013	72.8		IS3EU-1_TC
						MuDR-88_TAe
	TfSat106	362	0.0011	76.2		hAT-N12_RPr
	TfSat107	266	0.001	71.8
	TfSat108	123	0.001	63.4
	TfSat109	359	0.0011	76.6
	TfSat110	229	0.001	76.4		Harbinger-6_CGi
	TfSat111	115	0.0019	69.6	TCsat325
	TfSat112	321	0.0015	73.5		Gypsy-55_TrVa-I
	TfSat113	279	0.0013	71.3		KolobokP-7_MoPh
	TfSat114	176	0.0012	75.6
	TfSat115	156	0.0012	71.2
	TfSat116	159	0.0011	70.4
	TfSat117	301	0.001	76.1		CryptonH-10_HM KolobokH-1A_Rir
	TfSat118	302	0.001	78.5		Gypsy-131_DTa-I
	TfSat119	323	0.001	73.4		Helitron-1_AmAm Helitron-1_DK
	TfSat120	148	0.0011	64.2
	TfSat121	426	0.0029	63.1
	TfSat122	309	0.0011	73.1		Gypsy-6_EPa-I
	TfSat123	423	0.0019	65.7		Copia-53_MLP-I
						RTE-8_LVa
	TfSat124	225	0.0017	68.4
	TfSat125	161	0.0015	68.9		RTEX-14_CGi
	TfSat126	191	0.0015	63.9
	TfSat127	365	0.0013	70.7		Helitron-N6_ALy
	TfSat128	146	0.0013	73.3
	TfSat129	160	0.0013	69.4
	TfSat130	149	0.0013	71.8
	TfSat131	154	0.0013	75.3		ERV1-3_EL-I
	TfSat132	262	0.0013	67.6
	TfSat133	288	0.0013	74
	TfSat134	288	0.0013	76.7		Gypsy1-I_DM
						hAT-15_HRo
	TfSat135	190	0.0013	64.7
1,2 SatDNA consensus repeat unit length and genome proportion were estimated by the TAREAN analyses.
3 Elements from the class of DNA transposons are marked in red.
4 TfSat01 corresponds to the satDNA described in Juan et al. 1993, and deposited in the GenBank under the accession number X58539.
5 SatDNA described in Gržan et al. 2023
6 SatDNA described in Pavlek et al. 2015
7 TfSat09 corresponds to the satDNA detected in the non-transcribed spacer (NTS) regions in 5S rDNA arrays (Volarić et al. 2024).
* SatDNAs whose monomeric unit are based on a higher-order-repeat (HOR). The HOR structures are shown in Supplemental Fig. S2.
