# Supplementary material for: Dynamic evolution of satellite DNAs drastically differentiates the genomes of Tribolium sibling species
Source: HighWire-hosted journal article supplement (doi:10.1101/gr.280516.125), 2025-09-16
Supplement: Supplemental_Tables.zip [file Supplemental_Table_S4.xlsx]

## Sheet: Table S4
Supplemental Table S4. Number of satDNAmonomers annotated in the Tfree1.0 genome assembly using >70% sequence similarity criterion.
SatDNA	Total no. of arrays	Total no. of monomers	No. of monomers in arrays with <5 consecutive repeats	No. of monomers in arrays with ≥5 consecutive repeats	Percentage of monomers in arrays with ≥5 consecutive repeats (%)
TfSat01	8134	235577	8763	226814	96.28
TfSat02	551	3306	1074	2232	67.51
TfSat03	9662	34638	17092	17546	50.66
TfSat04	4	159	0	173	100
TfSat05	658	2236	1443	793	35.47
TfSat06	93	1264	109	1155	91.38
TfSat07	68	1143	78	1065	93.18
TfSat08	4	343	7	336	97.96
TfSat09	99	609	209	400	65.68
TfSat10	17	285	23	262	91.93
TfSat11	5	68	3	65	95.59
TfSat12	61	1344	88	1256	93.45
TfSat13	2	830	0	830	100
TfSat14	2	99	0	99	100
TfSat15	6	32	6	26	81.25
TfSat16	187	756	422	334	44.18
TfSat17	35	330	63	267	80.91
TfSat18	169	835	322	513	61.44
TfSat19	14	145	20	125	86.21
TfSat20	294	2136	661	1475	69.05
TfSat21	79	265	184	81	30.57
TfSat22	155	631	286	345	54.68
TfSat23	28	153	54	99	64.71
TfSat24	8	134	5	129	96.27
TfSat25	17	115	24	91	79.13
TfSat26	5	18	7	11	61.11
TfSat27	30	91	60	31	34.07
TfSat28	6	56	3	53	94.64
TfSat29	1	41	0	41	100
TfSat30	34	98	54	44	44.9
TfSat31	1	71	0	71	100
TfSat32	100	245	194	51	20.82
TfSat33	5	22	7	15	68.18
TfSat34	4	18	4	14	77.78
TfSat35	1	73	0	73	100
TfSat36	2	13	0	13	100
TfSat37	2	76	0	76	100
TfSat38	1	19	0	19	100
TfSat39	48	183	82	101	55.19
TfSat40	126	305	233	72	23.61
TfSat41	6	17	10	7	41.18
TfSat42	18	78	30	48	61.54
TfSat43	1	40	0	40	100
TfSat44	1	8	0	8	100
TfSat45	5	27	12	15	55.56
TfSat46	1	23	0	23	100
TfSat47	1	9	0	9	100
TfSat48	1	11	0	11	100
TfSat49	1	12	0	12	100
TfSat50	4	18	12	6	33.33
TfSat51	1	12	0	12	100
TfSat52	1	13	0	13	100
TfSat53	5	29	10	19	65.52
TfSat54	3	26	3	23	88.46
TfSat55	1	24	0	24	100
TfSat56	1	24	0	24	100
TfSat57	1	12	0	12	100
TfSat58	1	14	0	14	100
TfSat59	4	46	4	42	91.3
TfSat60	1	8	0	8	100
TfSat61	6	32	7	25	78.13
TfSat62	2	13	0	13	100
TfSat63	50	130	105	25	19.23
TfSat64	1	20	0	20	100
TfSat65	6	26	9	17	65.38
TfSat66	1	9	0	9	100
TfSat67	13	43	23	20	46.51
TfSat68	2	45	0	45	100
TfSat69	8	33	16	17	51.52
TfSat70	42	114	90	24	21.05
TfSat71	2	34	0	34	100
TfSat72	1	23	0	23	100
TfSat73	1	7	0	7	100
TfSat74	2	18	2	16	88.89
TfSat75	1	12	0	12	100
TfSat76	1	35	0	35	100
TfSat77	1	12	0	12	100
TfSat78	2	12	0	12	100
TfSat79	1	10	0	10	100
TfSat80	1	8	0	8	100
TfSat81	1	30	0	30	100
TfSat82	5	14	7	7	50
TfSat83	17	70	34	36	51.43
TfSat84	1	16	0	16	100
TfSat85	1	7	0	7	100
TfSat86	2	32	0	32	100
TfSat87	6	29	7	22	75.86
TfSat88	1	7	0	7	100
TfSat89	1	16	0	16	100
TfSat90	1	7	0	7	100
TfSat91	2	22	2	20	90.91
TfSat92	2	10	2	8	80
TfSat93	1	6	0	6	100
TfSat94	1	19	0	19	100
TfSat95	1	11	0	11	100
TfSat96	1	17	0	17	100
TfSat97	4	39	7	32	82.05
TfSat98	1	11	0	11	100
TfSat99	1	7	0	7	100
TfSat100	1	13	0	13	100
TfSat101	130	302	239	63	20.86
TfSat102	4	18	6	12	66.67
TfSat103	1	10	0	10	100
TfSat104	9	41	22	19	46.34
TfSat105	1	6	0	6	100
TfSat106	1	8	0	8	100
TfSat107	1	9	0	9	100
TfSat108	1	5	5	0	0
TfSat109	1	14	0	14	100
TfSat110	1	11	0	11	100
TfSat111	82	254	158	96	37.8
TfSat112	3	16	2	14	87.5
TfSat113	2	9	3	6	66.67
TfSat114	4	27	5	22	81.48
TfSat115	4	20	7	13	65
TfSat116	1	12	0	12	100
TfSat117	1	10	0	10	100
TfSat118	1	12	0	12	100
TfSat119	6	31	9	22	70.97
TfSat120	1	36	0	36	100
TfSat121	3	11	0	11	100
TfSat122	1	20	0	20	100
TfSat123	1	5	0	5	100
TfSat124	1	18	0	18	100
TfSat125	2	19	4	15	78.95
TfSat126	1	8	0	8	100
TfSat127	1	9	0	9	100
TfSat128	1	16	0	16	100
TfSat129	106	270	216	54	20
TfSat130	1	35	0	35	100
TfSat131	8	41	12	29	70.73
TfSat132	1	11	0	11	100
TfSat133	1	15	0	15	100
TfSat134	1	9	0	9	100
TfSat135	1	8	0	8	100
