# Supplementary material for: Dynamic evolution of satellite DNAs drastically differentiates the genomes of Tribolium sibling species
Source: HighWire-hosted journal article supplement (doi:10.1101/gr.280516.125), 2025-09-16
Supplement: Supplemental_Tables.zip [file Supplemental_Table_S5.xlsx]

## Sheet: Table S5
Supplemental Table S5. Distance of nearest annotated genes, satellite DNAs (satDNAs) and transposable elements (TEs) in the flanking 10-kb regions (left and right) for individual arrays of the T. freemani satDNAs. The arrays are defined as stretches containing ³5 consecutive monomers. The array ID name indicates the fLG chromosome (beginning of the name) and the position on the chromosome (end of…
SatDNA	Array ID	distance (in bp)_left_genes	distance (in bp)_right_genes	distance (in bp)_left_satDNAs	distance (in bp)_right_satDNAs	distance (in bp)_left_TEs	distance (in bp)_right_TEs
TfSat01	fLG2.TfSat01_TFREE.10526764			4637.5	1650.5	8922.33	7171.67
TfSat01	fLG2.TfSat01_TFREE.10532834			1432.5	4591.5	3958.6	1945.4
TfSat01	fLG2.TfSat01_TFREE.10539592					4616	4616
TfSat01	fLG2.TfSat01_TFREE.10548824					2442	8727.75
TfSat01	fLG2.TfSat01_TFREE.10555109			6271	1299.5
TfSat01	fLG2.TfSat01_TFREE.10598314					1865	6542
TfSat01	fLG2.TfSat01_TFREE.10684806			2204	9071.5	8647.5	2632
TfSat01	fLG2.TfSat01_TFREE.10700612			8216	872
TfSat01	fLG2.TfSat01_TFREE.10711613			1770.5	5364
TfSat01	fLG2.TfSat01_TFREE.10713717			3874.5	7129
TfSat01	fLG2.TfSat01_TFREE.10715467			4610	8700	9462.25	6699.5
TfSat01	fLG2.TfSat01_TFREE.10717872					7315.4	2971
TfSat01	fLG2.TfSat01_TFREE.10739051					6890	4178
TfSat01	fLG2.TfSat01_TFREE.10780369			5820.5	1692.5
TfSat01	fLG2.TfSat01_TFREE.10788858			2668.5	5985.5
TfSat01	fLG2.TfSat01_TFREE.107909			4833	4943.25
TfSat01	fLG2.TfSat01_TFREE.10823718			1426	6070.5
TfSat01	fLG2.TfSat01_TFREE.10827412			5960.33	7504.67
TfSat01	fLG2.TfSat01_TFREE.10829650			6585	1463
TfSat01	fLG2.TfSat01_TFREE.10837516			3788.33	6421.33
TfSat01	fLG2.TfSat01_TFREE.10905197			5091	4934
TfSat01	fLG2.TfSat01_TFREE.10915617			2884.67	2113.67
TfSat01	fLG2.TfSat01_TFREE.10920998			3128.33	6059.33
TfSat01	fLG2.TfSat01_TFREE.109304			4833	4943.25
TfSat01	fLG2.TfSat01_TFREE.10937182			1828	4592
TfSat01	fLG2.TfSat01_TFREE.10973381			5290	5299.5	7042	4518
TfSat01	fLG2.TfSat01_TFREE.10980207			2839	2761	216	1512
TfSat01	fLG2.TfSat01_TFREE.11087071			6411	1677.5
TfSat01	fLG2.TfSat01_TFREE.11095060			3237.67	4950
TfSat01	fLG2.TfSat01_TFREE.11158720			5894.5	1669.5
TfSat01	fLG2.TfSat01_TFREE.11167286			2671.5	5489.5
TfSat01	fLG2.TfSat01_TFREE.11203562			2698.5	5497.5
TfSat01	fLG2.TfSat01_TFREE.11256864			4724.5	4624
TfSat01	fLG2.TfSat01_TFREE.11260018			5808.33	4450
TfSat01	fLG2.TfSat01_TFREE.11332731			5740.5	1684.5
TfSat01	fLG2.TfSat01_TFREE.11341140			2668.5	5652.5
TfSat01	fLG2.TfSat01_TFREE.11370212			2358	5358.5
TfSat01	fLG2.TfSat01_TFREE.11421			9322	1022
TfSat01	fLG2.TfSat01_TFREE.11439796			8932.5	1257.5
TfSat01	fLG2.TfSat01_TFREE.11450526			1797.5	8107.5
TfSat01	fLG2.TfSat01_TFREE.11519995			4924	1926.5
TfSat01	fLG2.TfSat01_TFREE.11526156			1237	6691.5
TfSat01	fLG2.TfSat01_TFREE.11561781			7662.5	1070.5
TfSat01	fLG2.TfSat01_TFREE.11586754			6371	1637.5
TfSat01	fLG2.TfSat01_TFREE.11594820			857	8797
TfSat01	fLG2.TfSat01_TFREE.11648858			2069	4601
TfSat01	fLG2.TfSat01_TFREE.11650246			3457	6650
TfSat01	fLG2.TfSat01_TFREE.11705077					9542	351
TfSat01	fLG2.TfSat01_TFREE.11715098			6256.5	1444.5	2527.5	2509
TfSat01	fLG2.TfSat01_TFREE.11723046			1691.5	9044.5	3372	9515
TfSat01	fLG2.TfSat01_TFREE.11743745			1895	9027
TfSat01	fLG2.TfSat01_TFREE.117473			3394.75	3364
TfSat01	fLG2.TfSat01_TFREE.11749470			8553	812
TfSat01	fLG2.TfSat01_TFREE.11790867			8662	99	7817	951
TfSat01	fLG2.TfSat01_TFREE.11802007					7827	692
TfSat01	fLG2.TfSat01_TFREE.11894613			4985.5	1661
TfSat01	fLG2.TfSat01_TFREE.11901254			1655.5	8000
TfSat01	fLG2.TfSat01_TFREE.11906367			8047.5	1122.5
TfSat01	fLG2.TfSat01_TFREE.11972873			3571	1135
TfSat01	fLG2.TfSat01_TFREE.11978422			5954.5	5912.5
TfSat01	fLG2.TfSat01_TFREE.11979817			5954.5	5912.5
TfSat01	fLG2.TfSat01_TFREE.11982018			7158	1662.5
TfSat01	fLG2.TfSat01_TFREE.11990797			1621	8760.5
TfSat01	fLG2.TfSat01_TFREE.12020669			5782	6087.5
TfSat01	fLG2.TfSat01_TFREE.12024045			6360	808
TfSat01	fLG2.TfSat01_TFREE.12032099			5645.5	5383
TfSat01	fLG2.TfSat01_TFREE.12037628			5673.33	4412
TfSat01	fLG2.TfSat01_TFREE.12044105			4997.75	4841
TfSat01	fLG2.TfSat01_TFREE.12047467			4997.75	4841
TfSat01	fLG2.TfSat01_TFREE.12064785			6943.5	1758
TfSat01	fLG2.TfSat01_TFREE.12073397			1668.5	6177
TfSat01	fLG2.TfSat01_TFREE.12148176			1620	5404
TfSat01	fLG2.TfSat01_TFREE.12150410			3854	7638
TfSat01	fLG2.TfSat01_TFREE.12159820			9630	5528
TfSat01	fLG2.TfSat01_TFREE.12163020			7316.5	1496
TfSat01	fLG2.TfSat01_TFREE.12171969			1632.5	8247
TfSat01	fLG2.TfSat01_TFREE.12192424			807	8752
TfSat01	fLG2.TfSat01_TFREE.12213580			1292.5	7723.5
TfSat01	fLG2.TfSat01_TFREE.12218278			8803.5	1118.5
TfSat01	fLG2.TfSat01_TFREE.12238757			8036.5	1585
TfSat01	fLG2.TfSat01_TFREE.12248672			1878.5	5889
TfSat01	fLG2.TfSat01_TFREE.12267800			6108.5	1666.5
TfSat01	fLG2.TfSat01_TFREE.12285509			7125	758
TfSat01	fLG2.TfSat01_TFREE.12294718			5581	5580.5
TfSat01	fLG2.TfSat01_TFREE.12297253			5581	5580.5
TfSat01	fLG2.TfSat01_TFREE.12304548			752	7308
TfSat01	fLG2.TfSat01_TFREE.12309766			7887	811
TfSat01	fLG2.TfSat01_TFREE.12320135			1290.5	5569	50	2541
TfSat01	fLG2.TfSat01_TFREE.12336664			1282.5	5884
TfSat01	fLG2.TfSat01_TFREE.12377750			998	9438	589.5	7793.5
TfSat01	fLG2.TfSat01_TFREE.124162			1543	5141.5
TfSat01	fLG2.TfSat01_TFREE.12451568			3973.33	5200.33
TfSat01	fLG2.TfSat01_TFREE.12454601			5798	3973.33
TfSat01	fLG2.TfSat01_TFREE.12477562			6767.5	1638.5
TfSat01	fLG2.TfSat01_TFREE.12485749			760	9324
TfSat01	fLG2.TfSat01_TFREE.12565095			6494	738	9174	3834
TfSat01	fLG2.TfSat01_TFREE.12576308			7050.5	6930	2039	6533
TfSat01	fLG2.TfSat01_TFREE.12580219			6315.5	1709.5	5950	9896
TfSat01	fLG2.TfSat01_TFREE.12588159			4567	4567
TfSat01	fLG2.TfSat01_TFREE.12589353			4567	4567
TfSat01	fLG2.TfSat01_TFREE.12619458			7459	1763	4962	597
TfSat01	fLG2.TfSat01_TFREE.12671380			4610.5	1623.5
TfSat01	fLG2.TfSat01_TFREE.12677577			700	9556
TfSat01	fLG2.TfSat01_TFREE.12685097			6040	2167
TfSat01	fLG2.TfSat01_TFREE.12691889			752	4879
TfSat01	fLG2.TfSat01_TFREE.12694677			9536	790
TfSat01	fLG2.TfSat01_TFREE.12736130			3969	3968
TfSat01	fLG2.TfSat01_TFREE.12785278			5592.5	1126.5
TfSat01	fLG2.TfSat01_TFREE.12792357			1486.5	7917.5
TfSat01	fLG2.TfSat01_TFREE.12797522			8249.5	1633.5
TfSat01	fLG2.TfSat01_TFREE.12807024			1252.5	7322.5	3336	356
TfSat01	fLG2.TfSat01_TFREE.12810843			8299	777	483	6964
TfSat01	fLG2.TfSat01_TFREE.12821676			1648.5	8124.5
TfSat01	fLG2.TfSat01_TFREE.12843333			1890.5	4500.5
TfSat01	fLG2.TfSat01_TFREE.12874891					5315	1211
TfSat01	fLG2.TfSat01_TFREE.12881433			4397.5	1298	1227	4146
TfSat01	fLG2.TfSat01_TFREE.12895903			7958	98
TfSat01	fLG2.TfSat01_TFREE.12906349			1293.5	6384
TfSat01	fLG2.TfSat01_TFREE.12942243			768	8555
TfSat01	fLG2.TfSat01_TFREE.12948899			5071.5	1116.5
TfSat01	fLG2.TfSat01_TFREE.12990905			9004.5	1645.5
TfSat01	fLG2.TfSat01_TFREE.13001574			778	9758
TfSat01	fLG2.TfSat01_TFREE.13018614			8757	799
TfSat01	fLG2.TfSat01_TFREE.13047512			6930.5	1647.5
TfSat01	fLG2.TfSat01_TFREE.13068426			6392	1466
TfSat01	fLG2.TfSat01_TFREE.13076489			1671	8143
TfSat01	fLG2.TfSat01_TFREE.13097800			1241	6155.5
TfSat01	fLG2.TfSat01_TFREE.13118067			3519.5	3520
TfSat01	fLG2.TfSat01_TFREE.13163066			8117	1694
TfSat01	fLG2.TfSat01_TFREE.13172003			820	7546
TfSat01	fLG2.TfSat01_TFREE.13177848			7635	1801
TfSat01	fLG2.TfSat01_TFREE.13185582			4648	5003
TfSat01	fLG2.TfSat01_TFREE.13190494			6305	4585.75
TfSat01	fLG2.TfSat01_TFREE.13216762			6353.33	3002.33
TfSat01	fLG2.TfSat01_TFREE.13240465			8249	1612
TfSat01	fLG2.TfSat01_TFREE.13250352			4079	6196.67
TfSat01	fLG2.TfSat01_TFREE.13255398			4856	4899
TfSat01	fLG2.TfSat01_TFREE.13337393			6957	758
TfSat01	fLG2.TfSat01_TFREE.13406178			3277	5442.67
TfSat01	fLG2.TfSat01_TFREE.13413504			758	8119
TfSat01	fLG2.TfSat01_TFREE.13419528			6232	813
TfSat01	fLG2.TfSat01_TFREE.13499250			1675	8493
TfSat01	fLG2.TfSat01_TFREE.13518897			99	8604	6506	692
TfSat01	fLG2.TfSat01_TFREE.13547605			1739.5	4874.5
TfSat01	fLG2.TfSat01_TFREE.13562326			1653.5	8104
TfSat01	fLG2.TfSat01_TFREE.13585637			1652	5940.5
TfSat01	fLG2.TfSat01_TFREE.13601333			1636	8089.5
TfSat01	fLG2.TfSat01_TFREE.13623875			1292	5421.5
TfSat01	fLG2.TfSat01_TFREE.13626572			8900	825
TfSat01	fLG2.TfSat01_TFREE.13637918			1272.5	5880.5
TfSat01	fLG2.TfSat01_TFREE.13655223			3583.5	3583	3628	1063
TfSat01	fLG2.TfSat01_TFREE.13696252			6565.5	1631
TfSat01	fLG2.TfSat01_TFREE.13704486			3415	4620
TfSat01	fLG2.TfSat01_TFREE.13706352			4037	5679.33
TfSat01	fLG2.TfSat01_TFREE.13712731			2637	2637.5
TfSat01	fLG2.TfSat01_TFREE.13726647			5916	1656
TfSat01	fLG2.TfSat01_TFREE.13761689			4742	1617
TfSat01	fLG2.TfSat01_TFREE.13799079			6705	2019.5
TfSat01	fLG2.TfSat01_TFREE.13807544			1760	4094.5
TfSat01	fLG2.TfSat01_TFREE.13865100			9286	757	8441	1001
TfSat01	fLG2.TfSat01_TFREE.13876884			809	8565	3343	9756
TfSat01	fLG2.TfSat01_TFREE.13933842			754	4457
TfSat01	fLG2.TfSat01_TFREE.13936208			3120	7168
TfSat01	fLG2.TfSat01_TFREE.13939876			7271	1603.5
TfSat01	fLG2.TfSat01_TFREE.13948966			1819	4483.5
TfSat01	fLG2.TfSat01_TFREE.13993713			7786	1306
TfSat01	fLG2.TfSat01_TFREE.14002978			1479	6131
TfSat01	fLG2.TfSat01_TFREE.140447			5359	5354
TfSat01	fLG2.TfSat01_TFREE.14064954			1294.5	7267.5
TfSat01	fLG2.TfSat01_TFREE.14111710			1821.5	7786	1031	5468
TfSat01	fLG2.TfSat01_TFREE.14144871					6739	2832
TfSat01	fLG2.TfSat01_TFREE.14148913					2697	692
TfSat01	fLG2.TfSat01_TFREE.14181659			1464.5	5592.5
TfSat01	fLG2.TfSat01_TFREE.14184529			9277	809
TfSat01	fLG2.TfSat01_TFREE.14196339			758	9256
TfSat01	fLG2.TfSat01_TFREE.14227024			1567	4269.5
TfSat01	fLG2.TfSat01_TFREE.14243168			5020.5	1288.5
TfSat01	fLG2.TfSat01_TFREE.14249935			796	7759
TfSat01	fLG2.TfSat01_TFREE.14255434			5992	776
TfSat01	fLG2.TfSat01_TFREE.14263591			2165	6370
TfSat01	fLG2.TfSat01_TFREE.14281874			3596.33	4523
TfSat01	fLG2.TfSat01_TFREE.14283738			5198.75	4926.75
TfSat01	fLG2.TfSat01_TFREE.14293375			5781.5	5843
TfSat01	fLG2.TfSat01_TFREE.14296400			5388.33	4048.33
TfSat01	fLG2.TfSat01_TFREE.14303209			4758.75	4755.25
TfSat01	fLG2.TfSat01_TFREE.14304739			4758.75	4755.25
TfSat01	fLG2.TfSat01_TFREE.14312727			987	7852.5
TfSat01	fLG2.TfSat01_TFREE.14331079			750	5821.5
TfSat01	fLG2.TfSat01_TFREE.14379201			2564.67	3714.33
TfSat01	fLG2.TfSat01_TFREE.14381050			3181	4283
TfSat01	fLG2.TfSat01_TFREE.14402514			6169	99
TfSat01	fLG2.TfSat01_TFREE.14433813			6469.5	909.5
TfSat01	fLG2.TfSat01_TFREE.14442075			1792.5	6510.5
TfSat01	fLG2.TfSat01_TFREE.14445757			8572	1636
TfSat01	fLG2.TfSat01_TFREE.14455973			1644	6419
TfSat01	fLG2.TfSat01_TFREE.14511766			5115	5114.5
TfSat01	fLG2.TfSat01_TFREE.14512890			5115	5114.5
TfSat01	fLG2.TfSat01_TFREE.14521972					7380	1865
TfSat01	fLG2.TfSat01_TFREE.14593708			3407.67	5384.33
TfSat01	fLG2.TfSat01_TFREE.14603282			2233	4605	1437	198
TfSat01	fLG2.TfSat01_TFREE.14604505			3456	6150	214	1347
TfSat01	fLG2.TfSat01_TFREE.14621947			805	7690
TfSat01	fLG2.TfSat01_TFREE.146551			5359	5354
TfSat01	fLG2.TfSat01_TFREE.14663198			6971.5	1127.5	5405	965
TfSat01	fLG2.TfSat01_TFREE.14671584			1414.5	8245.5	2981	8408
TfSat01	fLG2.TfSat01_TFREE.14676947			8348	773
TfSat01	fLG2.TfSat01_TFREE.14695521			7167	1671
TfSat01	fLG2.TfSat01_TFREE.14703839			1151	4453
TfSat01	fLG2.TfSat01_TFREE.14722697			1623	6611.5
TfSat01	fLG2.TfSat01_TFREE.14747538			1305.5	7865.5
TfSat01	fLG2.TfSat01_TFREE.14752568			8135	792
TfSat01	fLG2.TfSat01_TFREE.14763435			1738.5	8466.5
TfSat01	fLG2.TfSat01_TFREE.14768962			8277	1067	7625	1545
TfSat01	fLG2.TfSat01_TFREE.14779626			1243	9239	3039	9440
TfSat01	fLG2.TfSat01_TFREE.14786153			8466	1683.5
TfSat01	fLG2.TfSat01_TFREE.14913246			4579.5	1456.5
TfSat01	fLG2.TfSat01_TFREE.14962513					7969	50
TfSat01	fLG2.TfSat01_TFREE.15000194			7108.5	1475.5
TfSat01	fLG2.TfSat01_TFREE.15008387			1084.5	4045.5	7557	4452.5
TfSat01	fLG2.TfSat01_TFREE.15009997			5116.67	6075.67	5947	2668.5
TfSat01	fLG2.TfSat01_TFREE.15020057			4185	3174.67	4113	7216.5
TfSat01	fLG2.TfSat01_TFREE.15021666			3648.67	2691.33	5722	8666.5
TfSat01	fLG2.TfSat01_TFREE.15027365			3668.5	3668.5
TfSat01	fLG2.TfSat01_TFREE.15028997			3668.5	3668.5
TfSat01	fLG2.TfSat01_TFREE.15034702			1080	8381.5
TfSat01	fLG2.TfSat01_TFREE.15040454			8140	805
TfSat01	fLG2.TfSat01_TFREE.150434			4254.5	4440.5
TfSat01	fLG2.TfSat01_TFREE.15050715					6225	1865
TfSat01	fLG2.TfSat01_TFREE.15083447			1287.5	6749
TfSat01	fLG2.TfSat01_TFREE.15133576			8121	1698
TfSat01	fLG2.TfSat01_TFREE.15142771			78	8992
TfSat01	fLG2.TfSat01_TFREE.15150012			9090	772
TfSat01	fLG2.TfSat01_TFREE.15161239					8709	1360
TfSat01	fLG2.TfSat01_TFREE.15187043			1273	6218
TfSat01	fLG2.TfSat01_TFREE.15190406					8255.6	2154.4
TfSat01	fLG2.TfSat01_TFREE.15200328			4517	1481.5	1666.4	3679.6
TfSat01	fLG2.TfSat01_TFREE.15206342			4049	6188.67
TfSat01	fLG2.TfSat01_TFREE.15211536			5624.67	4091.67
TfSat01	fLG2.TfSat01_TFREE.15218622			1613	5225
TfSat01	fLG2.TfSat01_TFREE.15220361			9185	821
TfSat01	fLG2.TfSat01_TFREE.15245691			6562	1298
TfSat01	fLG2.TfSat01_TFREE.152749			5691.67	3690.33
TfSat01	fLG2.TfSat01_TFREE.15276026			9939	749	313	8038
TfSat01	fLG2.TfSat01_TFREE.15287979			1056.5	6495
TfSat01	fLG2.TfSat01_TFREE.15382404			8666	794
TfSat01	fLG2.TfSat01_TFREE.15393544			1629.5	7706.5
TfSat01	fLG2.TfSat01_TFREE.15439029			7686	3300
TfSat01	fLG2.TfSat01_TFREE.15441746			4969	776
TfSat01	fLG2.TfSat01_TFREE.15448843			2128	7335
TfSat01	fLG2.TfSat01_TFREE.15464438			6139	1759
TfSat01	fLG2.TfSat01_TFREE.15471350			773	5809	8665	4785.5
TfSat01	fLG2.TfSat01_TFREE.15474715			4138	7357	5883	3875.67
TfSat01	fLG2.TfSat01_TFREE.15483988			4824	1476	3390	6219.33
TfSat01	fLG2.TfSat01_TFREE.15490493			1681	5522
TfSat01	fLG2.TfSat01_TFREE.15493355			3856	9683
TfSat01	fLG2.TfSat01_TFREE.15506296			6507	1887
TfSat01	fLG2.TfSat01_TFREE.15513872			5441	5416
TfSat01	fLG2.TfSat01_TFREE.15517739			6639	1510.5
TfSat01	fLG2.TfSat01_TFREE.15543776			6991.5	3366
TfSat01	fLG2.TfSat01_TFREE.15555296			1814	5389	4687.8	2290.2
TfSat01	fLG2.TfSat01_TFREE.171114			6844	1345
TfSat01	fLG2.TfSat01_TFREE.195174			6522	1610.5
TfSat01	fLG2.TfSat01_TFREE.236223					4564	8899
TfSat01	fLG2.TfSat01_TFREE.271998					8281.5	6087.5
TfSat01	fLG2.TfSat01_TFREE.275365			8493	1134	4914.5	670.5
TfSat01	fLG2.TfSat01_TFREE.286577			1828.5	8205.5
TfSat01	fLG2.TfSat01_TFREE.290790			8927	768
TfSat01	fLG2.TfSat01_TFREE.302396			1664.5	5519.5
TfSat01	fLG2.TfSat01_TFREE.311442			7528	1004
TfSat01	fLG2.TfSat01_TFREE.321756			78	8768
TfSat01	fLG2.TfSat01_TFREE.328612			5679.5	1896
TfSat01	fLG2.TfSat01_TFREE.335522			3416.67	5561	9368	4316
TfSat01	fLG2.TfSat01_TFREE.5966982	5353.18	6882.94
TfSat01	fLG2.TfSat01_TFREE.5989550			793	9378
TfSat01	fLG2.TfSat01_TFREE.5996915			7134	745
TfSat01	fLG2.TfSat01_TFREE.6006252			2203	9762
TfSat01	fLG2.TfSat01_TFREE.6012472			6516	66
TfSat01	fLG2.TfSat01_TFREE.6041116			6068	914.5
TfSat01	fLG2.TfSat01_TFREE.6048982			1798	6533.5
TfSat01	fLG2.TfSat01_TFREE.6076703			5210	1722.5
TfSat01	fLG2.TfSat01_TFREE.6082836			923	3550.5
TfSat01	fLG2.TfSat01_TFREE.6099450			9919	99
TfSat01	fLG2.TfSat01_TFREE.6119849			4011	1350.5
TfSat01	fLG2.TfSat01_TFREE.6147330					1578	7845
TfSat01	fLG2.TfSat01_TFREE.6196121			8786	2647
TfSat01	fLG2.TfSat01_TFREE.6200712			4195	99
TfSat01	fLG2.TfSat01_TFREE.6207092			5532	5821.5	7693	4745
TfSat01	fLG2.TfSat01_TFREE.6210131			6681.5	1688	4654	1044
TfSat01	fLG2.TfSat01_TFREE.6218478			1665.5	4821	3693	5465
TfSat01	fLG2.TfSat01_TFREE.6253817			2214.5	5750.5
TfSat01	fLG2.TfSat01_TFREE.6256879			5276.5	8477.5
TfSat01	fLG2.TfSat01_TFREE.6299659			1654.5	6600.5
TfSat01	fLG2.TfSat01_TFREE.6371564			1463	5418	3129	589
TfSat01	fLG2.TfSat01_TFREE.6374260			8938	803	433	6304
TfSat01	fLG2.TfSat01_TFREE.6385387			1470.5	7090.5
TfSat01	fLG2.TfSat01_TFREE.6414942			1843	4443
TfSat01	fLG2.TfSat01_TFREE.6437003			790	8880
TfSat01	fLG2.TfSat01_TFREE.6443873			7080	691
TfSat01	fLG2.TfSat01_TFREE.6453157			2204	9762
TfSat01	fLG2.TfSat01_TFREE.6459376			6531	66
TfSat01	fLG2.TfSat01_TFREE.6486440			6066.5	914.5
TfSat01	fLG2.TfSat01_TFREE.6494285			1778.5	6512.5
TfSat01	fLG2.TfSat01_TFREE.6524471			5210	1722.5
TfSat01	fLG2.TfSat01_TFREE.6530589			908	3535.5
TfSat01	fLG2.TfSat01_TFREE.6551344			4625	4628.75
TfSat01	fLG2.TfSat01_TFREE.6552567			4625	4628.75
TfSat01	fLG2.TfSat01_TFREE.6560545			1051.5	3544
TfSat01	fLG2.TfSat01_TFREE.6561768			2274.5	5928
TfSat01	fLG2.TfSat01_TFREE.6608299			800	9579
TfSat01	fLG2.TfSat01_TFREE.6615827			7751	1122.5	6061	955
TfSat01	fLG2.TfSat01_TFREE.6660261			1629	4284
TfSat01	fLG2.TfSat01_TFREE.6685203			7702	66
TfSat01	fLG2.TfSat01_TFREE.6727865			5966	913.5
TfSat01	fLG2.TfSat01_TFREE.6735633			1802	8180.5
TfSat01	fLG2.TfSat01_TFREE.6756473			1645	7246
TfSat01	fLG2.TfSat01_TFREE.6760830			6505.5	1527
TfSat01	fLG2.TfSat01_TFREE.6769072			4164	5824.33
TfSat01	fLG2.TfSat01_TFREE.6773106			5475.67	4070.33
TfSat01	fLG2.TfSat01_TFREE.6780535			4491.33	5747
TfSat01	fLG2.TfSat01_TFREE.6783898			7288	1093.5
TfSat01	fLG2.TfSat01_TFREE.6792945			4746.25	4885.25
TfSat01	fLG2.TfSat01_TFREE.6794481			4746.25	4885.25
TfSat01	fLG2.TfSat01_TFREE.6822469			7642.5	3187.5
TfSat01	fLG2.TfSat01_TFREE.6834654			1826	5071.5	4357.8	2290.2
TfSat01	fLG2.TfSat01_TFREE.9160	1463.5	3802			2983.33	7078
TfSat01	fLG3.TfSat01_TFREE.2015605	7812.8	5950
TfSat01	fLG3.TfSat01_TFREE.30613577			5452	1520
TfSat01	fLG3.TfSat01_TFREE.30629458			3130	100
TfSat01	fLG3.TfSat01_TFREE.30663295			9984	924
TfSat01	fLG3.TfSat01_TFREE.30675807			748	9111
TfSat01	fLG3.TfSat01_TFREE.30698893			1670	8476
TfSat01	fLG3.TfSat01_TFREE.30703854			7321.5	1696
TfSat01	fLG3.TfSat01_TFREE.30712751			1575.5	7311
TfSat01	fLG3.TfSat01_TFREE.30717199			8777	1529
TfSat01	fLG3.TfSat01_TFREE.30727724			1748	5343
TfSat01	fLG3.TfSat01_TFREE.30747391			3549.67	5370.67
TfSat01	fLG3.TfSat01_TFREE.30754888			4767	5478.5
TfSat01	fLG3.TfSat01_TFREE.30756316			8007	815
TfSat01	fLG3.TfSat01_TFREE.30767001			1388.5	7500
TfSat01	fLG3.TfSat01_TFREE.30782295			768	9284
TfSat01	fLG3.TfSat01_TFREE.30789719			9460	773
TfSat01	fLG3.TfSat01_TFREE.30801858			99	9293
TfSat01	fLG3.TfSat01_TFREE.30828814			4884.25	4789.5
TfSat01	fLG3.TfSat01_TFREE.30830242			4884.25	4789.5
TfSat01	fLG3.TfSat01_TFREE.30849137			3022	782
TfSat01	fLG3.TfSat01_TFREE.30852368			209	9294
TfSat01	fLG3.TfSat01_TFREE.30879789			8175.5	1788.5
TfSat01	fLG3.TfSat01_TFREE.30889595			744	9439
TfSat01	fLG3.TfSat01_TFREE.30896942			8652	99
TfSat01	fLG3.TfSat01_TFREE.30908313			4040.33	5345
TfSat01	fLG3.TfSat01_TFREE.30911326			5538.33	3972.67
TfSat01	fLG3.TfSat01_TFREE.30919343			1688.5	6685.5
TfSat01	fLG3.TfSat01_TFREE.30923027			7689	1684
TfSat01	fLG3.TfSat01_TFREE.30932292			1576	6189
TfSat01	fLG3.TfSat01_TFREE.30935613			8682	831
TfSat01	fLG3.TfSat01_TFREE.30947298			1334	8678
TfSat01	fLG3.TfSat01_TFREE.30958946			9039	6106
TfSat01	fLG3.TfSat01_TFREE.30960964			7985	3307
TfSat01	fLG3.TfSat01_TFREE.30964262			4687	2008
TfSat01	fLG3.TfSat01_TFREE.30986625			6995	1384.5
TfSat01	fLG3.TfSat01_TFREE.30994941			1321	8239.5
TfSat01	fLG3.TfSat01_TFREE.31057658			4820	5357.5
TfSat01	fLG3.TfSat01_TFREE.31059086			5011	3661
TfSat01	fLG3.TfSat01_TFREE.31067429			1590	4693
TfSat01	fLG3.TfSat01_TFREE.31103421			1767	6198.5	8350	4938.5
TfSat01	fLG3.TfSat01_TFREE.31119821			3868	209	5423.8	8144.8
TfSat01	fLG3.TfSat01_TFREE.31124440			751	4008
TfSat01	fLG3.TfSat01_TFREE.31140838			1291.5	7138.5
TfSat01	fLG3.TfSat01_TFREE.31158970			1587.5	7801
TfSat01	fLG3.TfSat01_TFREE.31163928			6004	4517.33
TfSat01	fLG3.TfSat01_TFREE.31171563			1501	8071.5
TfSat01	fLG3.TfSat01_TFREE.31176826			5894	4519.67
TfSat01	fLG3.TfSat01_TFREE.31210625			1803.5	5452
TfSat01	fLG3.TfSat01_TFREE.31227634			1386.5	8326.5
TfSat01	fLG3.TfSat01_TFREE.31250665			7475	1643
TfSat01	fLG3.TfSat01_TFREE.31259943			1803	4455
TfSat01	fLG3.TfSat01_TFREE.31288730			1364.5	8472.5
TfSat01	fLG3.TfSat01_TFREE.31294682			6137.5	1815.5
TfSat01	fLG3.TfSat01_TFREE.31312339			8465	1821.5
TfSat01	fLG3.TfSat01_TFREE.31322273			752	9109
TfSat01	fLG3.TfSat01_TFREE.31329539			3210	803
TfSat01	fLG3.TfSat01_TFREE.31332958			4898.5	4531.5
TfSat01	fLG3.TfSat01_TFREE.31400802			7027.5	1403
TfSat01	fLG3.TfSat01_TFREE.31409308			1478.5	8254
TfSat01	fLG3.TfSat01_TFREE.31414405			5593	5425
TfSat01	fLG3.TfSat01_TFREE.31421844			2111	6160
TfSat01	fLG3.TfSat01_TFREE.31461246			3184	3061.5	7864.43	6050.43
TfSat01	fLG3.TfSat01_TFREE.31794146			5780	1697.5	4223	6255
TfSat01	fLG3.TfSat01_TFREE.31802348			2452.33	3600.33	49	2217
TfSat01	fLG3.TfSat01_TFREE.31895150			3825.33	2579.67
TfSat01	fLG3.TfSat01_TFREE.31975581			773	4138
TfSat01	fLG3.TfSat01_TFREE.31987482			1757	1424.5
TfSat01	fLG3.TfSat01_TFREE.31990992			2	7770
TfSat01	fLG3.TfSat01_TFREE.32014376			9076	2007	5654	315
TfSat01	fLG3.TfSat01_TFREE.32024449					5666.8	5436.2
TfSat01	fLG3.TfSat01_TFREE.32035616					4562	6569
TfSat01	fLG3.TfSat01_TFREE.32050901			4499	4618.5	8402	1966
TfSat01	fLG3.TfSat01_TFREE.32374541			1535.5	6935.5	5530	9365
TfSat01	fLG3.TfSat01_TFREE.32395323			9418	894	6689	315
TfSat01	fLG3.TfSat01_TFREE.32406450			3885	5214.33	5666	5666
TfSat01	fLG3.TfSat01_TFREE.32409488			5973	4075.67	3856	315
TfSat01	fLG3.TfSat01_TFREE.32417783			322	9998
TfSat01	fLG3.TfSat01_TFREE.32439841			5126	1599.5	3871.67	5727.22
TfSat01	fLG3.TfSat01_TFREE.32447440			2479	3491.33	3824	5611
TfSat01	fLG3.TfSat01_TFREE.32571314			2	5481	8196.22	3143.33
TfSat01	fLG3.TfSat01_TFREE.32839671			3953	3823.5	1657	7595
TfSat01	fLG3.TfSat01_TFREE.32861152					8868	315
TfSat01	fLG3.TfSat01_TFREE.33155069			3542.25	4881.25	71	2251
TfSat01	fLG3.TfSat01_TFREE.33236450			767	3635
TfSat01	fLG3.TfSat01_TFREE.33308849			2	2747
TfSat01	fLG3.TfSat01_TFREE.33311666			5657	5644
TfSat01	fLG3.TfSat01_TFREE.33315032			5133	873
TfSat01	fLG3.TfSat01_TFREE.33335431					8585	2271
TfSat01	fLG3.TfSat01_TFREE.33350795			5395	5181	4824	9817
TfSat01	fLG5.TfSat01_TFREE.1026847			782	9795
TfSat01	fLG5.TfSat01_TFREE.1034770			9156	761
TfSat01	fLG5.TfSat01_TFREE.1046731			1802	5282
TfSat01	fLG5.TfSat01_TFREE.1060694			3542	3400.5
TfSat01	fLG5.TfSat01_TFREE.1068809			1833.5	6487
TfSat01	fLG5.TfSat01_TFREE.1095998			3939	8772.5
TfSat01	fLG5.TfSat01_TFREE.1114924			1685.5	8061
TfSat01	fLG5.TfSat01_TFREE.1119744			5492	9618
TfSat01	fLG5.TfSat01_TFREE.1139463			1794	5319.5
TfSat01	fLG5.TfSat01_TFREE.1157825			1711.5	7122.5
TfSat01	fLG5.TfSat01_TFREE.1187406			1211.5	8077.5
TfSat01	fLG5.TfSat01_TFREE.1192617			5310	9634
TfSat01	fLG5.TfSat01_TFREE.1217237			764	8948
TfSat01	fLG5.TfSat01_TFREE.1224330			9450	761
TfSat01	fLG5.TfSat01_TFREE.1236583			1800	5448.5
TfSat01	fLG5.TfSat01_TFREE.1297004			9936	6093
TfSat01	fLG5.TfSat01_TFREE.1299847			7809	2326
TfSat01	fLG5.TfSat01_TFREE.1309133			761	9447
TfSat01	fLG5.TfSat01_TFREE.1316730			8616	1475.5
TfSat01	fLG5.TfSat01_TFREE.1327146			1800	5448.5
TfSat01	fLG5.TfSat01_TFREE.1387542			5994.5	2027
TfSat01	fLG5.TfSat01_TFREE.1396026			2489.5	7653
TfSat01	fLG5.TfSat01_TFREE.1399390			4840	8582
TfSat01	fLG5.TfSat01_TFREE.1454029			9450	761
TfSat01	fLG5.TfSat01_TFREE.1466285			1803	5451.5
TfSat01	fLG5.TfSat01_TFREE.1527212			9760	5917
TfSat01	fLG5.TfSat01_TFREE.1530054			7634	2326
TfSat01	fLG5.TfSat01_TFREE.1539174			770	8952
TfSat01	fLG5.TfSat01_TFREE.1546267			9278	758
TfSat01	fLG5.TfSat01_TFREE.1558348			1800	5448.5
TfSat01	fLG5.TfSat01_TFREE.1607178			6003.5	2036
TfSat01	fLG5.TfSat01_TFREE.1615683			2501.5	7665
TfSat01	fLG5.TfSat01_TFREE.1619047			4852	8594
TfSat01	fLG5.TfSat01_TFREE.1645370			9696	1868
TfSat01	fLG5.TfSat01_TFREE.1681039			2322.5	6956
TfSat01	fLG5.TfSat01_TFREE.1700956			8734	2758	1942	2599
TfSat01	fLG5.TfSat01_TFREE.1705646			4755.5	1750	2748	4468
TfSat01	fLG5.TfSat01_TFREE.1723221			5812.5	1707.5	1091	1806
TfSat01	fLG5.TfSat01_TFREE.1802852			921	8735
TfSat01	fLG5.TfSat01_TFREE.1810765			9603	6330
TfSat01	fLG5.TfSat01_TFREE.1814170			7085	1769.5
TfSat01	fLG5.TfSat01_TFREE.1830994			8198	878
TfSat01	fLG5.TfSat01_TFREE.1840828			1636	5959
TfSat01	fLG5.TfSat01_TFREE.1861393			952	7842.5
TfSat01	fLG5.TfSat01_TFREE.1866760			5768	4325
TfSat01	fLG5.TfSat01_TFREE.1953519			8809	99
TfSat01	fLG5.TfSat01_TFREE.1964534			1488.5	7234.5
TfSat01	fLG5.TfSat01_TFREE.1982780			1040	9421
TfSat01	fLG5.TfSat01_TFREE.2030640			3964	4664.5
TfSat01	fLG5.TfSat01_TFREE.2036545			98	3896
TfSat01	fLG5.TfSat01_TFREE.2118997			969	5763
TfSat01	fLG5.TfSat01_TFREE.2122763			9263	746
TfSat01	fLG5.TfSat01_TFREE.2134876			3336.67	5698.33
TfSat01	fLG5.TfSat01_TFREE.2141672			4947	4795.5
TfSat01	fLG5.TfSat01_TFREE.2144192			4947	4795.5
TfSat01	fLG5.TfSat01_TFREE.2181102					5036	703
TfSat01	fLG5.TfSat01_TFREE.2186148			8925.5	2620	10	7824
TfSat01	fLG5.TfSat01_TFREE.2229600			1721	5311.5
TfSat01	fLG5.TfSat01_TFREE.2231795			5720.33	6773.67
TfSat01	fLG5.TfSat01_TFREE.2233011			6234.5	6289.5
TfSat01	fLG5.TfSat01_TFREE.2236383			7061.5	4680.5
TfSat01	fLG5.TfSat01_TFREE.2237600			5844.5	2801.5
TfSat01	fLG5.TfSat01_TFREE.2241199			2320.5	2320.5
TfSat01	fLG5.TfSat01_TFREE.2242241			2320.5	2320.5
TfSat01	fLG5.TfSat01_TFREE.2245840			5400.67	3201.33
TfSat01	fLG5.TfSat01_TFREE.2255412			1508.5	7977.5
TfSat01	fLG5.TfSat01_TFREE.2304776			9103	1642
TfSat01	fLG5.TfSat01_TFREE.2359251			7483.5	1463.5
TfSat01	fLG5.TfSat01_TFREE.2463059			2130	7457
TfSat01	fLG5.TfSat01_TFREE.2481655			1646	6141
TfSat01	fLG5.TfSat01_TFREE.2548494			4150	5689.33
TfSat01	fLG5.TfSat01_TFREE.2550691			4994.5	5248
TfSat01	fLG5.TfSat01_TFREE.2559587			4444	4375.5
TfSat01	fLG5.TfSat01_TFREE.2563597			4444	4375.5
TfSat01	fLG5.TfSat01_TFREE.2568475			1872	6915
TfSat01	fLG5.TfSat01_TFREE.2572486			9236	796
TfSat01	fLG5.TfSat01_TFREE.2583568			972.5	4079
TfSat01	fLG5.TfSat01_TFREE.2597168			6316	1854
TfSat01	fLG5.TfSat01_TFREE.2604321			837	7344
TfSat01	fLG5.TfSat01_TFREE.2609431			9236	796
TfSat01	fLG5.TfSat01_TFREE.2620514			973	4081
TfSat01	fLG5.TfSat01_TFREE.2634115			6483	1854
TfSat01	fLG5.TfSat01_TFREE.2641426			828	8044
TfSat01	fLG5.TfSat01_TFREE.2681520			4110.33	5538.33
TfSat01	fLG5.TfSat01_TFREE.2684558			4937	4891.5
TfSat01	fLG5.TfSat01_TFREE.2692299			1672	9060
TfSat01	fLG5.TfSat01_TFREE.2698343			7164.5	1299.5
TfSat01	fLG5.TfSat01_TFREE.2706983			3514	3740
TfSat01	fLG5.TfSat01_TFREE.2709019			3514	3740
TfSat01	fLG5.TfSat01_TFREE.2751339			1854	7959
TfSat01	fLG5.TfSat01_TFREE.2809200			1854	7458
TfSat01	fLG5.TfSat01_TFREE.2834633			8499	1713
TfSat01	fLG5.TfSat01_TFREE.2901046			7777.5	5454
TfSat01	fLG5.TfSat01_TFREE.2902954			5869.5	2718
TfSat01	fLG5.TfSat01_TFREE.3006393					189	1707
TfSat01	fLG5.TfSat01_TFREE.3073837			4847.75	4790.75
TfSat01	fLG5.TfSat01_TFREE.3078333			4847.75	4790.75
TfSat01	fLG5.TfSat01_TFREE.3091976			7694.5	1698.5
TfSat01	fLG5.TfSat01_TFREE.3117904			6757.5	1664.5	7183	3506
TfSat01	fLG5.TfSat01_TFREE.3125638			3571	5018.67	551	3545
TfSat01	fLG5.TfSat01_TFREE.3128516			5306	5307.25	5305	5308
TfSat01	fLG5.TfSat01_TFREE.3137085			3054.67	4617.67	4116	4113
TfSat01	fLG5.TfSat01_TFREE.3144480			1854	5515	2812	2861
TfSat01	fLG5.TfSat01_TFREE.3146688			9386	790	2812	6873
TfSat01	fLG5.TfSat01_TFREE.3157926			975.5	7114	7550	2993
TfSat01	fLG5.TfSat01_TFREE.3162611			9407	811	2865	4012
TfSat01	fLG5.TfSat01_TFREE.3173873					9172	554.5
TfSat01	fLG5.TfSat01_TFREE.3183491			7126.5	1787.5	446	4334.5
TfSat01	fLG5.TfSat01_TFREE.3226781			9987	3364
TfSat01	fLG5.TfSat01_TFREE.3232689			4965.5	1635.5	9903	8027
TfSat01	fLG5.TfSat01_TFREE.3239311					3281	5556
TfSat01	fLG5.TfSat01_TFREE.3249535					6943	8321
TfSat01	fLG5.TfSat01_TFREE.3278747			6748.5	1658.5
TfSat01	fLG5.TfSat01_TFREE.3286469			3941	4024.25
TfSat01	fLG5.TfSat01_TFREE.3287471			3941	4024.25
TfSat01	fLG5.TfSat01_TFREE.3294354			976.5	4230
TfSat01	fLG5.TfSat01_TFREE.3296391			5251.5	5184
TfSat01	fLG5.TfSat01_TFREE.3306653					9380	1790.5
TfSat01	fLG5.TfSat01_TFREE.3317715			5991	1816.5	1064	3781.5
TfSat01	fLG5.TfSat01_TFREE.3362182			4948	1617.5
TfSat01	fLG5.TfSat01_TFREE.3368759			4318.5	4318.5
TfSat01	fLG5.TfSat01_TFREE.3465412			1720	4794	4480	1220.5
TfSat01	fLG5.TfSat01_TFREE.3471115			9152	4093	1223	6796.5
TfSat01	fLG5.TfSat01_TFREE.3475184			5972	3660	5292	7898.5
TfSat01	fLG5.TfSat01_TFREE.3476310			4846	2547	6418	9011.5
TfSat01	fLG5.TfSat01_TFREE.3477371			3785	1475	6421	9284
TfSat01	fLG5.TfSat01_TFREE.3505145					9462	3219
TfSat01	fLG5.TfSat01_TFREE.3522229			3796.67	4919.33	7622	9528
TfSat01	fLG5.TfSat01_TFREE.3524258			4757	4700
TfSat01	fLG5.TfSat01_TFREE.3551899			6775	1628.5	48	3532.5
TfSat01	fLG5.TfSat01_TFREE.3600315					9978	4746
TfSat01	fLG5.TfSat01_TFREE.3606083					4210	1153
TfSat01	fLG5.TfSat01_TFREE.3609109					5089.5	3645.5
TfSat01	fLG5.TfSat01_TFREE.3623170			9102	728	2804	9710.5
TfSat01	fLG5.TfSat01_TFREE.3663816			1696.5	6694.5
TfSat01	fLG5.TfSat01_TFREE.3667519			7128.67	5475
TfSat01	fLG5.TfSat01_TFREE.3671564			4392	2073.5
TfSat01	fLG5.TfSat01_TFREE.3711940			1435.5	4936	2341	4366.5
TfSat01	fLG5.TfSat01_TFREE.3747476			7094	729
TfSat01	fLG5.TfSat01_TFREE.3756389			1819	9194
TfSat01	fLG5.TfSat01_TFREE.3762428			8683	799
TfSat01	fLG5.TfSat01_TFREE.3799319			750	9975
TfSat01	fLG5.TfSat01_TFREE.3807372			4866	1553
TfSat01	fLG5.TfSat01_TFREE.3869053			1651	8333
TfSat01	fLG5.TfSat01_TFREE.3874441			7743.5	1562.5
TfSat01	fLG5.TfSat01_TFREE.3893044			8967	1816.5
TfSat01	fLG5.TfSat01_TFREE.3903570			6294.67	3853
TfSat01	fLG5.TfSat01_TFREE.3914377			5055.25	4880
TfSat01	fLG5.TfSat01_TFREE.3917351			5055.25	4880
TfSat01	fLG5.TfSat01_TFREE.3924448			5391.5	5594.25
TfSat01	fLG5.TfSat01_TFREE.3927991			5194.67	3833.67
TfSat01	fLG5.TfSat01_TFREE.3966922			5816.5	1802
TfSat01	fLG5.TfSat01_TFREE.3995582			5922.5	1790.5
TfSat01	fLG5.TfSat01_TFREE.4021566			1646.5	8041
TfSat01	fLG5.TfSat01_TFREE.4072339			8058	1446
TfSat01	fLG5.TfSat01_TFREE.4082011			1614	5608
TfSat01	fLG5.TfSat01_TFREE.4132340			8182.5	1668.5
TfSat01	fLG5.TfSat01_TFREE.4150886			7872	1829
TfSat01	fLG5.TfSat01_TFREE.4180457			9459	771
TfSat01	fLG5.TfSat01_TFREE.4201959			6817.5	1650.5
TfSat01	fLG5.TfSat01_TFREE.4221154			9444	776
TfSat01	fLG5.TfSat01_TFREE.4256317			8758	827
TfSat01	fLG5.TfSat01_TFREE.4267627			1665.5	8510
TfSat01	fLG5.TfSat01_TFREE.4273178			6330	9447
TfSat01	fLG5.TfSat01_TFREE.4274882			9570	5055
TfSat01	fLG5.TfSat01_TFREE.4278336			7099	2366
TfSat01	fLG5.TfSat01_TFREE.4292535			743	9610
TfSat01	fLG5.TfSat01_TFREE.4300302					4467	3259
TfSat01	fLG5.TfSat01_TFREE.4302067					2702	2007
TfSat01	fLG5.TfSat01_TFREE.4325915			2896.5	8014.5
TfSat01	fLG5.TfSat01_TFREE.4342689			4878.5	4424
TfSat01	fLG5.TfSat01_TFREE.4345805			5803.33	3875
TfSat01	fLG5.TfSat01_TFREE.4375868			8785	1910
TfSat01	fLG5.TfSat01_TFREE.4422790			1595.5	6877.5
TfSat01	fLG5.TfSat01_TFREE.4439749			4019	4063
TfSat01	fLG5.TfSat01_TFREE.4447634			1679	5251.5
TfSat01	fLG5.TfSat01_TFREE.4476224			4477	955.5
TfSat01	fLG5.TfSat01_TFREE.4481700			4644.25	4480
TfSat01	fLG5.TfSat01_TFREE.4483656			4644.25	4480
TfSat01	fLG5.TfSat01_TFREE.4491326			1336.5	9044.5
TfSat01	fLG5.TfSat01_TFREE.4516506			821	9635	8368	934
TfSat01	fLG5.TfSat01_TFREE.4524183			4094	1596.5	691	390
TfSat01	fLG5.TfSat01_TFREE.4545675			5346	731
TfSat01	fLG5.TfSat01_TFREE.4552560			1539	6666
TfSat01	fLG5.TfSat01_TFREE.4567965			6491	1652
TfSat01	fLG5.TfSat01_TFREE.4575924			1468	8121
TfSat01	fLG5.TfSat01_TFREE.4581352			5631.5	1631.5
TfSat01	fLG5.TfSat01_TFREE.4588448			1464.5	7949.5
TfSat01	fLG5.TfSat01_TFREE.4593708			5677	4107.33
TfSat01	fLG5.TfSat01_TFREE.4612930			6600.5	1780.5
TfSat01	fLG5.TfSat01_TFREE.4656765			5239	5480
TfSat01	fLG5.TfSat01_TFREE.4659294			5226.33	3880.33
TfSat01	fLG5.TfSat01_TFREE.4722775					1580	379
TfSat01	fLG5.TfSat01_TFREE.4724109					246	3463
TfSat01	fLG5.TfSat01_TFREE.4728518			8346	5568	4163	5192
TfSat01	fLG5.TfSat01_TFREE.4730246			6618	1849	5891	8911
TfSat01	fLG5.TfSat01_TFREE.4769835			5199	5230.5
TfSat01	fLG5.TfSat01_TFREE.4773010			5199	5230.5
TfSat01	fLG5.TfSat01_TFREE.4781117			5291	5208.75	4092	1521
TfSat01	fLG5.TfSat01_TFREE.4818892			4897	1497
TfSat01	fLG5.TfSat01_TFREE.4967447			4980	5086.5
TfSat01	fLG5.TfSat01_TFREE.5006150			4431	737
TfSat01	fLG5.TfSat01_TFREE.5022771			4145	956
TfSat01	fLG5.TfSat01_TFREE.5027915			999	4521
TfSat01	fLG5.TfSat01_TFREE.5044853			99	8366
TfSat01	fLG5.TfSat01_TFREE.5078174			818	9967	9372	1603
TfSat01	fLG5.TfSat01_TFREE.5086186			4763	1596.5	1360	390
TfSat01	fLG5.TfSat01_TFREE.5102529			6072	1610.5
TfSat01	fLG5.TfSat01_TFREE.5109894			1293	6931.5
TfSat01	fLG5.TfSat01_TFREE.5123942			4968.5	1634
TfSat01	fLG5.TfSat01_TFREE.5130262			1351.5	8169
TfSat01	fLG5.TfSat01_TFREE.5135855			6120	1619
TfSat01	fLG5.TfSat01_TFREE.5153352			6265	1780.5
TfSat01	fLG5.TfSat01_TFREE.5172688			8964	1787.5
TfSat01	fLG5.TfSat01_TFREE.5183312			1660	6816.5
TfSat01	fLG5.TfSat01_TFREE.5212677			4875.75	4961
TfSat01	fLG5.TfSat01_TFREE.5214710			4875.75	4961
TfSat01	fLG5.TfSat01_TFREE.5248265			9221.5	1179
TfSat01	fLG5.TfSat01_TFREE.5259104			1617.5	7190
TfSat01	fLG5.TfSat01_TFREE.5263407			6029	5735
TfSat01	fLG5.TfSat01_TFREE.5309569			8581	695
TfSat01	fLG5.TfSat01_TFREE.5320744			1707.5	5539.5
TfSat01	fLG5.TfSat01_TFREE.5401041					1914	379
TfSat01	fLG5.TfSat01_TFREE.5402709					246	3463
TfSat01	fLG5.TfSat01_TFREE.5407118			8492.5	5714.5	4163	5192
TfSat01	fLG5.TfSat01_TFREE.5408847			6763.5	2318.5	5892	8588
TfSat01	fLG5.TfSat01_TFREE.5440212			5095	5165.5
TfSat01	fLG5.TfSat01_TFREE.5482426			5656	1465
TfSat01	fLG5.TfSat01_TFREE.5488814					9451.25	367.25
TfSat01	fLG5.TfSat01_TFREE.5500083					1070.5	6457.75
TfSat01	fLG5.TfSat01_TFREE.5505426					6413.5	7971.75
TfSat01	fLG5.TfSat01_TFREE.5506966					7401.2	8947.8
TfSat01	fLG5.TfSat01_TFREE.5508933			9521	3064
TfSat01	fLG5.TfSat01_TFREE.5520706			3538	3452.25
TfSat01	fLG5.TfSat01_TFREE.5600370			9530	3507
TfSat01	fLG5.TfSat01_TFREE.5605306			4594	734
TfSat01	fLG5.TfSat01_TFREE.5627008			7408	800
TfSat01	fLG5.TfSat01_TFREE.5646402			8128	779
TfSat01	fLG5.TfSat01_TFREE.5657224			1747	7014
TfSat01	fLG5.TfSat01_TFREE.5662344			7819	7715
TfSat01	fLG5.TfSat01_TFREE.5663554			7819	7715
TfSat01	fLG5.TfSat01_TFREE.5664929			7991	1997
TfSat01	fLG5.TfSat01_TFREE.5676673			2763.67	7280.33
TfSat01	fLG5.TfSat01_TFREE.5698713			1836	7845.5
TfSat01	fLG5.TfSat01_TFREE.5717364			1872.5	6299.5
TfSat01	fLG5.TfSat01_TFREE.5720566					7138	159
TfSat01	fLG5.TfSat01_TFREE.5728217			4421.5	1592	513	2835
TfSat01	fLG5.TfSat01_TFREE.5759864			8345	1666
TfSat01	fLG5.TfSat01_TFREE.5769896			1687	4844
TfSat01	fLG5.TfSat01_TFREE.5784372			1795	8170
TfSat01	fLG5.TfSat01_TFREE.5813725			8626	1632.5
TfSat01	fLG5.TfSat01_TFREE.5824113			752	8393
TfSat01	fLG5.TfSat01_TFREE.5847379			1733.5	5646.5
TfSat01	fLG5.TfSat01_TFREE.5863053			1766.5	7130
TfSat01	fLG5.TfSat01_TFREE.5867246			7979.5	1169
TfSat01	fLG5.TfSat01_TFREE.5876868			1642.5	8697
TfSat01	fLG5.TfSat01_TFREE.5882403			7360	1409.5
TfSat01	fLG5.TfSat01_TFREE.5941942			3858	3857.25	521	1927
TfSat01	fLG5.TfSat01_TFREE.5949869			2750.5	7292
TfSat01	fLG5.TfSat01_TFREE.5953116			5153	9936
TfSat01	fLG5.TfSat01_TFREE.5956625			8446	5272
TfSat01	fLG5.TfSat01_TFREE.5958824			6247	2404
TfSat01	fLG5.TfSat01_TFREE.5979454			8483.5	1155.5
TfSat01	fLG5.TfSat01_TFREE.5990984			2029	8659
TfSat01	fLG5.TfSat01_TFREE.6021468			1876	8288.5
TfSat01	fLG5.TfSat01_TFREE.6026509			8623	1570
TfSat01	fLG5.TfSat01_TFREE.6048979			7622.5	1567
TfSat01	fLG5.TfSat01_TFREE.6084074			5328.5	4967.5
TfSat01	fLG5.TfSat01_TFREE.6096446			1649.5	6584
TfSat01	fLG5.TfSat01_TFREE.6210461			1460.5	4796.5
TfSat01	fLG5.TfSat01_TFREE.6225949			1976.5	7515
TfSat01	fLG5.TfSat01_TFREE.6230148			8530.5	1641.5
TfSat01	fLG5.TfSat01_TFREE.6291744			1597	4428.5
TfSat01	fLG5.TfSat01_TFREE.6320228			8314	1312.5	801	6070
TfSat01	fLG5.TfSat01_TFREE.6330111			1569	7690.5
TfSat01	fLG5.TfSat01_TFREE.6349257			789	9849
TfSat01	fLG5.TfSat01_TFREE.6357173			5291	1699
TfSat01	fLG5.TfSat01_TFREE.6363453			4840.75	4837.5
TfSat01	fLG5.TfSat01_TFREE.6366868			4840.75	4837.5
TfSat01	fLG5.TfSat01_TFREE.6373313			3213.5	3218.25
TfSat01	fLG5.TfSat01_TFREE.6379730			3206.75	3207
TfSat01	fLG5.TfSat01_TFREE.6385971			3668	6155.67
TfSat01	fLG5.TfSat01_TFREE.6397566			789	8774	11	6528
TfSat01	fLG5.TfSat01_TFREE.6404123			6510.5	1611
TfSat01	fLG5.TfSat01_TFREE.6412396			1762.5	7303
TfSat01	fLG5.TfSat01_TFREE.6441457			8934	1621.5
TfSat01	fLG5.TfSat01_TFREE.6452174			1783	6949.5
TfSat01	fLG5.TfSat01_TFREE.6455721			8711	1693
TfSat01	fLG5.TfSat01_TFREE.6466162			1730	7099
TfSat01	fLG5.TfSat01_TFREE.6470360			8392.5	1596
TfSat01	fLG5.TfSat01_TFREE.6480404			1651.5	7811
TfSat01	fLG5.TfSat01_TFREE.6485270			6717	1454.5
TfSat01	fLG5.TfSat01_TFREE.6493283			1296	8266.5
TfSat01	fLG5.TfSat01_TFREE.6498819			7289	1400.5
TfSat01	fLG5.TfSat01_TFREE.6550978			1843	6341	5854.5	9521
TfSat01	fLG5.TfSat01_TFREE.6554225			5090	9692
TfSat01	fLG5.TfSat01_TFREE.6559752			9021	4653
TfSat01	fLG5.TfSat01_TFREE.6562628			6985	2329
TfSat01	fLG5.TfSat01_TFREE.6571230			4955.75	4955.75
TfSat01	fLG5.TfSat01_TFREE.6581159			1634.5	5105.5
TfSat01	fLG5.TfSat01_TFREE.6583342					8765	554
TfSat01	fLG5.TfSat01_TFREE.6605951			7806	1455.5
TfSat01	fLG5.TfSat01_TFREE.6615231			1474	8002.5
TfSat01	fLG5.TfSat01_TFREE.6638261			4654.75	4747.25
TfSat01	fLG5.TfSat01_TFREE.6646365			1604.5	4665
TfSat01	fLG5.TfSat01_TFREE.6648880			3385	8510
TfSat01	fLG5.TfSat01_TFREE.6729455			5477	1879
TfSat01	fLG5.TfSat01_TFREE.6735868			936	5809	7286.2	3725.6
TfSat01	fLG5.TfSat01_TFREE.6739375			4443	7318	4648.83	3113.5
TfSat01	fLG5.TfSat01_TFREE.922573			8571	815	2094	6711
TfSat01	fLG5.TfSat01_TFREE.941638			6656	1512	3682	50
TfSat01	fLG5.TfSat01_TFREE.950109			1815	5132	4789	6694
TfSat01	fLG5.TfSat01_TFREE.966927			1871.5	6595
TfSat01	fLG5.TfSat01_TFREE.987283			2115.5	6114
TfSat01	fLG5.TfSat01_TFREE.989707			4539.5	7341
TfSat01	fLG5.TfSat01_TFREE.990953			9813	99
TfSat01	fLG6.TfSat01_TFREE.10013502			4465.33	5839.33
TfSat01	fLG6.TfSat01_TFREE.10016097			7950.5	1543.5
TfSat01	fLG6.TfSat01_TFREE.10025951			1903.5	5647.5
TfSat01	fLG6.TfSat01_TFREE.10028413			8610	759
TfSat01	fLG6.TfSat01_TFREE.10055128			4031	99
TfSat01	fLG6.TfSat01_TFREE.10104587			4807.5	1483.5
TfSat01	fLG6.TfSat01_TFREE.10110895			3952.67	5735.67
TfSat01	fLG6.TfSat01_TFREE.10115830			5777.5	5368
TfSat01	fLG6.TfSat01_TFREE.10151560			5471	1824.5
TfSat01	fLG6.TfSat01_TFREE.10167736			5490.5	1664
TfSat01	fLG6.TfSat01_TFREE.10174856			1629.5	6536
TfSat01	fLG6.TfSat01_TFREE.10178471			8118	1673.5
TfSat01	fLG6.TfSat01_TFREE.10187968			99	8631
TfSat01	fLG6.TfSat01_TFREE.10194365			5795	1644.5
TfSat01	fLG6.TfSat01_TFREE.10202037			1877	8373.5
TfSat01	fLG6.TfSat01_TFREE.10227038			753	9962
TfSat01	fLG6.TfSat01_TFREE.10234476			6313	1713
TfSat01	fLG6.TfSat01_TFREE.10268615					6732	2305
TfSat01	fLG6.TfSat01_TFREE.10273157					2190	882
TfSat01	fLG6.TfSat01_TFREE.10289979			3676.5	1490	6412	3547
TfSat01	fLG6.TfSat01_TFREE.10298014			4358.5	7386	1623	5329
TfSat01	fLG6.TfSat01_TFREE.10342761			3181	773
TfSat01	fLG6.TfSat01_TFREE.10364570			1622.5	6078	5645	8830.25
TfSat01	fLG6.TfSat01_TFREE.10367589			8339	1786
TfSat01	fLG6.TfSat01_TFREE.10377576					4216.5	3694.5
TfSat01	fLG6.TfSat01_TFREE.10402432			1651	6980.5
TfSat01	fLG6.TfSat01_TFREE.10406383			9484	801
TfSat01	fLG6.TfSat01_TFREE.10418273			1561	7971
TfSat01	fLG6.TfSat01_TFREE.10440558			1821	5470
TfSat01	fLG6.TfSat01_TFREE.10467040			1659.5	4525
TfSat01	fLG6.TfSat01_TFREE.10468308			2927.5	7122
TfSat01	fLG6.TfSat01_TFREE.10472738			9462	749
TfSat01	fLG6.TfSat01_TFREE.10485011			4111.33	5239.33
TfSat01	fLG6.TfSat01_TFREE.10486035			7694	14
TfSat01	fLG6.TfSat01_TFREE.10494493			2137	1910.5
TfSat01	fLG6.TfSat01_TFREE.10498755			752	7128
TfSat01	fLG6.TfSat01_TFREE.10518575			9840	2563
TfSat01	fLG6.TfSat01_TFREE.10523785			5880	1323
TfSat01	fLG6.TfSat01_TFREE.10531014			99	8541
TfSat01	fLG6.TfSat01_TFREE.10572469			7484	1579
TfSat01	fLG6.TfSat01_TFREE.10590068			8823	3614
TfSat01	fLG6.TfSat01_TFREE.10594961			5231	1822.5
TfSat01	fLG6.TfSat01_TFREE.10623497			8285	1630
TfSat01	fLG6.TfSat01_TFREE.10634277			4511	4934.5
TfSat01	fLG6.TfSat01_TFREE.10642583			1974	1917
TfSat01	fLG6.TfSat01_TFREE.10646504			749	6787
TfSat01	fLG6.TfSat01_TFREE.10672963			7702	1150
TfSat01	fLG6.TfSat01_TFREE.10682014			1349	8420
TfSat01	fLG6.TfSat01_TFREE.10719572			7665.5	1591
TfSat01	fLG6.TfSat01_TFREE.10728904			1666.5	8135
TfSat01	fLG6.TfSat01_TFREE.10733993			6546.5	1813
TfSat01	fLG6.TfSat01_TFREE.10741929			99	9464
TfSat01	fLG6.TfSat01_TFREE.10749137			8749.5	1503
TfSat01	fLG6.TfSat01_TFREE.10759364			1477.5	7744
TfSat01	fLG6.TfSat01_TFREE.10779262			4452.5	4931
TfSat01	fLG6.TfSat01_TFREE.10789082			4516.5	4515
TfSat01	fLG6.TfSat01_TFREE.10793648			4516.5	4515
TfSat01	fLG6.TfSat01_TFREE.10797193			800	3211
TfSat01	fLG6.TfSat01_TFREE.10822287			794	8654
TfSat01	fLG6.TfSat01_TFREE.10829055			4589	1706.5
TfSat01	fLG6.TfSat01_TFREE.10862902			9209	2828
TfSat01	fLG6.TfSat01_TFREE.10867540			5288	1809
TfSat01	fLG6.TfSat01_TFREE.10889902			7479	1910
TfSat01	fLG6.TfSat01_TFREE.10898160			779	4380
TfSat01	fLG6.TfSat01_TFREE.10926386			1626	5278.5
TfSat01	fLG6.TfSat01_TFREE.10951732			1636.5	5122.5
TfSat01	fLG6.TfSat01_TFREE.10973640			3077.33	4343
TfSat01	fLG6.TfSat01_TFREE.10979158			5609.33	3446.67
TfSat01	fLG6.TfSat01_TFREE.11035786			4748	1184
TfSat01	fLG6.TfSat01_TFREE.11042002			3761	5649.33
TfSat01	fLG6.TfSat01_TFREE.11046433			5518.5	5301.75
TfSat01	fLG6.TfSat01_TFREE.11052892			3787.5	3966.25
TfSat01	fLG6.TfSat01_TFREE.11053872			3787.5	3966.25
TfSat01	fLG6.TfSat01_TFREE.11060967			1821	5295
TfSat01	fLG6.TfSat01_TFREE.11082184			1639.5	5123.5
TfSat01	fLG6.TfSat01_TFREE.11107171			1639.5	5126.5
TfSat01	fLG6.TfSat01_TFREE.11151482			4567.5	4880
TfSat01	fLG6.TfSat01_TFREE.11158686			832	3241
TfSat01	fLG6.TfSat01_TFREE.11160280			8625	767
TfSat01	fLG6.TfSat01_TFREE.11171732			821	9582
TfSat01	fLG6.TfSat01_TFREE.11178834			9770	759
TfSat01	fLG6.TfSat01_TFREE.11191417			1809	6629.5	716	2693
TfSat01	fLG6.TfSat01_TFREE.11194860			8384	758	2727	9311
TfSat01	fLG6.TfSat01_TFREE.11226604			4042	1244.5
TfSat01	fLG6.TfSat01_TFREE.11232349			1703	8340.5
TfSat01	fLG6.TfSat01_TFREE.11254226			7653	1381.5
TfSat01	fLG6.TfSat01_TFREE.11274200			5439	1788.5
TfSat01	fLG6.TfSat01_TFREE.11281135			1496	7770.5
TfSat01	fLG6.TfSat01_TFREE.11303570			761	9826
TfSat01	fLG6.TfSat01_TFREE.11324792			749	9815
TfSat01	fLG6.TfSat01_TFREE.11332273			7009.5	1382.5
TfSat01	fLG6.TfSat01_TFREE.11340800			3727.67	5374.33
TfSat01	fLG6.TfSat01_TFREE.11344901			4474	3760
TfSat01	fLG6.TfSat01_TFREE.11362281			5333	5142.75
TfSat01	fLG6.TfSat01_TFREE.11367211			5333	5142.75
TfSat01	fLG6.TfSat01_TFREE.11372901			758	9277
TfSat01	fLG6.TfSat01_TFREE.11387424			8877	2827
TfSat01	fLG6.TfSat01_TFREE.11391731			5287	1806
TfSat01	fLG6.TfSat01_TFREE.11408572			7561	1829
TfSat01	fLG6.TfSat01_TFREE.11416871			738	4337	9630	7728
TfSat01	fLG6.TfSat01_TFREE.11418807			9660	790	7694	50
TfSat01	fLG6.TfSat01_TFREE.11430953			1710	5127.5	4452	6685
TfSat01	fLG6.TfSat01_TFREE.11446197			7665	1405
TfSat01	fLG6.TfSat01_TFREE.11476672			4304.5	4140
TfSat01	fLG6.TfSat01_TFREE.11484675			764	6304
TfSat01	fLG6.TfSat01_TFREE.11504753			5955	1806.5
TfSat01	fLG6.TfSat01_TFREE.11512240			1532	8008.5
TfSat01	fLG6.TfSat01_TFREE.11530569			1890	5607.5
TfSat01	fLG6.TfSat01_TFREE.11532697			8872	1589
TfSat01	fLG6.TfSat01_TFREE.11556122			6602.5	1275
TfSat01	fLG6.TfSat01_TFREE.11575497			3716	790
TfSat01	fLG6.TfSat01_TFREE.11579422			5833	3559
TfSat01	fLG6.TfSat01_TFREE.11626711			7370.5	1762.5
TfSat01	fLG6.TfSat01_TFREE.11635570			4055	6137.33
TfSat01	fLG6.TfSat01_TFREE.11640839			5440	4066.33
TfSat01	fLG6.TfSat01_TFREE.11663946			5298	1816
TfSat01	fLG6.TfSat01_TFREE.11697051			1602	6840
TfSat01	fLG6.TfSat01_TFREE.11700998			8120	1657.5
TfSat01	fLG6.TfSat01_TFREE.11710516			4148.33	6612
TfSat01	fLG6.TfSat01_TFREE.11715676			5611.33	4375.33
TfSat01	fLG6.TfSat01_TFREE.11722861			1397.5	8214
TfSat01	fLG6.TfSat01_TFREE.11727850			7510	1453
TfSat01	fLG6.TfSat01_TFREE.11736387			1027	6441
TfSat01	fLG6.TfSat01_TFREE.11768641			8546.5	1680
TfSat01	fLG6.TfSat01_TFREE.11778988			1800.5	7732
TfSat01	fLG6.TfSat01_TFREE.11833589			8713.5	1332.5
TfSat01	fLG6.TfSat01_TFREE.11844539			5797.67	3486.67
TfSat01	fLG6.TfSat01_TFREE.11884977			1834.5	7927	6232	1637
TfSat01	fLG6.TfSat01_TFREE.11889687			5515	9616	1522	882
TfSat01	fLG6.TfSat01_TFREE.11902328			3975.5	1497
TfSat01	fLG6.TfSat01_TFREE.11908119			1815.5	5297
TfSat01	fLG6.TfSat01_TFREE.11920174					3539	20
TfSat01	fLG6.TfSat01_TFREE.11923775					4267	4267
TfSat01	fLG6.TfSat01_TFREE.11927541					4267	4287
TfSat01	fLG6.TfSat01_TFREE.11932309			7664	1505.5	62	4628
TfSat01	fLG6.TfSat01_TFREE.11941249			3885	5031
TfSat01	fLG6.TfSat01_TFREE.11942677			4601	5060.5
TfSat01	fLG6.TfSat01_TFREE.11998622			8334.5	1782.5
TfSat01	fLG6.TfSat01_TFREE.12037832			759	7805
TfSat01	fLG6.TfSat01_TFREE.12043880			6565.5	1783
TfSat01	fLG6.TfSat01_TFREE.12052136			1690.5	8475
TfSat01	fLG6.TfSat01_TFREE.12074105			1449	4275
TfSat01	fLG6.TfSat01_TFREE.12094935			8015	1919
TfSat01	fLG6.TfSat01_TFREE.12106517			4095.25	6538.25
TfSat01	fLG6.TfSat01_TFREE.12110033			5498	3902.33
TfSat01	fLG6.TfSat01_TFREE.12132288			9111	749
TfSat01	fLG6.TfSat01_TFREE.12144103			1870	8366.5
TfSat01	fLG6.TfSat01_TFREE.12176612			4236.5	4236.5
TfSat01	fLG6.TfSat01_TFREE.12185085			100	3104
TfSat01	fLG6.TfSat01_TFREE.12199350			4025.67	6224
TfSat01	fLG6.TfSat01_TFREE.12204573			5047.33	3797
TfSat01	fLG6.TfSat01_TFREE.12222468			7823.5	1384.5
TfSat01	fLG6.TfSat01_TFREE.12242076			4368	1483.5
TfSat01	fLG6.TfSat01_TFREE.12248048			1604	6153.5
TfSat01	fLG6.TfSat01_TFREE.12251651			7527	1483.5
TfSat01	fLG6.TfSat01_TFREE.12261003			1825	8703.5
TfSat01	fLG6.TfSat01_TFREE.12281805			1827	6934.5
TfSat01	fLG6.TfSat01_TFREE.12318480			7122	1947.5
TfSat01	fLG6.TfSat01_TFREE.12327407			749	9951
TfSat01	fLG6.TfSat01_TFREE.12334920			7520.5	1532.5
TfSat01	fLG6.TfSat01_TFREE.12344056			4089.67	5109.67
TfSat01	fLG6.TfSat01_TFREE.12345412			4541.67	6663
TfSat01	fLG6.TfSat01_TFREE.12350100			2994	209
TfSat01	fLG6.TfSat01_TFREE.12353881			787	2696
TfSat01	fLG6.TfSat01_TFREE.12354976			5515.5	5377
TfSat01	fLG6.TfSat01_TFREE.12366944			1815.5	8131
TfSat01	fLG6.TfSat01_TFREE.12394197			8996	805
TfSat01	fLG6.TfSat01_TFREE.12405386			3754.33	5669.33
TfSat01	fLG6.TfSat01_TFREE.12410319			4535	4155
TfSat01	fLG6.TfSat01_TFREE.12439236			5633	1818
TfSat01	fLG6.TfSat01_TFREE.12446404			1535	8476
TfSat01	fLG6.TfSat01_TFREE.12451974			6027.5	1700.5
TfSat01	fLG6.TfSat01_TFREE.12459583			4297.67	5112.67
TfSat01	fLG6.TfSat01_TFREE.12460783			5233.5	5190
TfSat01	fLG6.TfSat01_TFREE.12480562			8621	764
TfSat01	fLG6.TfSat01_TFREE.12491897			1824.5	8542.5
TfSat01	fLG6.TfSat01_TFREE.12514082			756	8613	8155	1208
TfSat01	fLG6.TfSat01_TFREE.12525047			760	3168	2810	5265
TfSat01	fLG6.TfSat01_TFREE.12562655			6515	1150
TfSat01	fLG6.TfSat01_TFREE.12599007			1800.5	6722
TfSat01	fLG6.TfSat01_TFREE.12646335			4436.5	1786
TfSat01	fLG6.TfSat01_TFREE.12652444			1672.5	7336
TfSat01	fLG6.TfSat01_TFREE.12671632			8373	1005
TfSat01	fLG6.TfSat01_TFREE.12693536			5439	1791
TfSat01	fLG6.TfSat01_TFREE.12700477			785	8811
TfSat01	fLG6.TfSat01_TFREE.12728524			5221	99
TfSat01	fLG6.TfSat01_TFREE.12733954			3969.5	4783
TfSat01	fLG6.TfSat01_TFREE.12758162			4448	1464.5
TfSat01	fLG6.TfSat01_TFREE.12783002			7675.5	1602.5
TfSat01	fLG6.TfSat01_TFREE.12792357			1679.5	8351.5
TfSat01	fLG6.TfSat01_TFREE.12824468			4991	4262
TfSat01	fLG6.TfSat01_TFREE.12826228			6294.33	3745.67
TfSat01	fLG6.TfSat01_TFREE.12835944			3909.33	6161
TfSat01	fLG6.TfSat01_TFREE.12841374			4716.33	3670.67
TfSat01	fLG6.TfSat01_TFREE.12856597			6448	1471
TfSat01	fLG6.TfSat01_TFREE.12864842			1797	4946
TfSat01	fLG6.TfSat01_TFREE.12866532			2484	8789
TfSat01	fLG6.TfSat01_TFREE.12890340			1289	3951.5
TfSat01	fLG6.TfSat01_TFREE.12891438			2387	9216.5
TfSat01	fLG6.TfSat01_TFREE.12896706			9015	2956
TfSat01	fLG6.TfSat01_TFREE.12901023			5416	1769.5
TfSat01	fLG6.TfSat01_TFREE.12907909			4272.75	4180.5
TfSat01	fLG6.TfSat01_TFREE.12909177			4272.75	4180.5
TfSat01	fLG6.TfSat01_TFREE.12916777			1792.5	4792.5
TfSat01	fLG6.TfSat01_TFREE.12928170			8506	1760
TfSat01	fLG6.TfSat01_TFREE.12972491			757	2832
TfSat01	fLG6.TfSat01_TFREE.12986518			806	7736
TfSat01	fLG6.TfSat01_TFREE.13005520			1783.5	6603.5
TfSat01	fLG6.TfSat01_TFREE.13008963			8553	758
TfSat01	fLG6.TfSat01_TFREE.13058731			4341	1395
TfSat01	fLG6.TfSat01_TFREE.13064720			1648	6269
TfSat01	fLG6.TfSat01_TFREE.13084433			7819.5	1381.5
TfSat01	fLG6.TfSat01_TFREE.13093889			749	9272
TfSat01	fLG6.TfSat01_TFREE.13100996			5261	1613
TfSat01	fLG6.TfSat01_TFREE.13107916			1659	8138
TfSat01	fLG6.TfSat01_TFREE.13126574			1975	5548.5
TfSat01	fLG6.TfSat01_TFREE.13142876			1877	5428
TfSat01	fLG6.TfSat01_TFREE.13144838			8534	336
TfSat01	fLG6.TfSat01_TFREE.13192724			5537	1768
TfSat01	fLG6.TfSat01_TFREE.13230041			5115.5	1800
TfSat01	fLG6.TfSat01_TFREE.13236701			827	8515	9926	3395
TfSat01	fLG6.TfSat01_TFREE.13243391					3236	7343
TfSat01	fLG6.TfSat01_TFREE.13259834			4564.5	4761.25
TfSat01	fLG6.TfSat01_TFREE.13268900			2677.67	3851
TfSat01	fLG6.TfSat01_TFREE.13286032			9271	98
TfSat01	fLG6.TfSat01_TFREE.13296108			805	5997
TfSat01	fLG6.TfSat01_TFREE.13300312			7179.5	1606.5
TfSat01	fLG6.TfSat01_TFREE.13324429			5149	1832
TfSat01	fLG6.TfSat01_TFREE.13331321			1743	5563
TfSat01	fLG6.TfSat01_TFREE.13361624			3415.67	4363
TfSat01	fLG6.TfSat01_TFREE.13363052			5132.5	4918.75
TfSat01	fLG6.TfSat01_TFREE.13384607			3152	744
TfSat01	fLG6.TfSat01_TFREE.13387968			4475.5	3685
TfSat01	fLG6.TfSat01_TFREE.13399242			795	9836
TfSat01	fLG6.TfSat01_TFREE.13407099			8000	1922.5
TfSat01	fLG6.TfSat01_TFREE.13444571			1659.5	8621.5
TfSat01	fLG6.TfSat01_TFREE.13449783			6482.5	1595
TfSat01	fLG6.TfSat01_TFREE.13457960			4151.67	5625.67
TfSat01	fLG6.TfSat01_TFREE.13461076			5838.33	4141.33
TfSat01	fLG6.TfSat01_TFREE.13469448			1578	7651
TfSat01	fLG6.TfSat01_TFREE.13487916			1740	5387.5
TfSat01	fLG6.TfSat01_TFREE.13514967			2626.33	3810
TfSat01	fLG6.TfSat01_TFREE.13520034			4966	6051.33
TfSat01	fLG6.TfSat01_TFREE.13521296			4524	5020
TfSat01	fLG6.TfSat01_TFREE.13531694			4426.25	4593.75
TfSat01	fLG6.TfSat01_TFREE.13533800			4426.25	4593.75
TfSat01	fLG6.TfSat01_TFREE.13553560			7118.5	1800.5
TfSat01	fLG6.TfSat01_TFREE.13562142			1463.5	8438.5
TfSat01	fLG6.TfSat01_TFREE.13567739			6566.5	1677
TfSat01	fLG6.TfSat01_TFREE.13575936			4445	4595.5
TfSat01	fLG6.TfSat01_TFREE.13585736			6109.67	3737.33
TfSat01	fLG6.TfSat01_TFREE.13617551			5105.5	1791
TfSat01	fLG6.TfSat01_TFREE.13674671			4443	1792
TfSat01	fLG6.TfSat01_TFREE.13680760			1646	8476
TfSat01	fLG6.TfSat01_TFREE.13693061			8121.5	1323
TfSat01	fLG6.TfSat01_TFREE.13703023			1840.5	8666
TfSat01	fLG6.TfSat01_TFREE.13719982			7305	1784.5
TfSat01	fLG6.TfSat01_TFREE.13748132					1476	6744
TfSat01	fLG6.TfSat01_TFREE.13756408			5922	3700	6800	7839
TfSat01	fLG6.TfSat01_TFREE.13759302			4840	2853.67
TfSat01	fLG6.TfSat01_TFREE.13768142			4344.5	4313
TfSat01	fLG6.TfSat01_TFREE.13769893			4344.5	4313
TfSat01	fLG6.TfSat01_TFREE.13797648			8960	764
TfSat01	fLG6.TfSat01_TFREE.3968317	4510	9522	6399	687	4039.33	8648
TfSat01	fLG6.TfSat01_TFREE.3975486			770	6486
TfSat01	fLG6.TfSat01_TFREE.3998336			1499	8991
TfSat01	fLG6.TfSat01_TFREE.4029333			7488.5	1659
TfSat01	fLG6.TfSat01_TFREE.4038612			1790.5	4443
TfSat01	fLG6.TfSat01_TFREE.4075080			6084.5	1595.5
TfSat01	fLG6.TfSat01_TFREE.4099774			4594	1785.5
TfSat01	fLG6.TfSat01_TFREE.4105855			770	8789	8653	1568
TfSat01	fLG6.TfSat01_TFREE.4112783			7698	9884	1725	473
TfSat01	fLG6.TfSat01_TFREE.4115636			8805	1632.5	1128	7134
TfSat01	fLG6.TfSat01_TFREE.4134858			8435	99
TfSat01	fLG6.TfSat01_TFREE.4145990			1398	8578
TfSat01	fLG6.TfSat01_TFREE.4164441			5325	1389.5
TfSat01	fLG6.TfSat01_TFREE.4171262			4845.75	4990.25
TfSat01	fLG6.TfSat01_TFREE.4175327			4845.75	4990.25
TfSat01	fLG6.TfSat01_TFREE.4181240			1782.5	4889
TfSat01	fLG6.TfSat01_TFREE.4199886			3175.75	3176
TfSat01	fLG6.TfSat01_TFREE.4230961			1711.5	8774.5
TfSat01	fLG6.TfSat01_TFREE.4270979			927	9972
TfSat01	fLG6.TfSat01_TFREE.4281379			8156	1598
TfSat01	fLG6.TfSat01_TFREE.4291045			1510	8945
TfSat01	fLG6.TfSat01_TFREE.4297313			9129	750
TfSat01	fLG6.TfSat01_TFREE.4309160			1760	6114
TfSat01	fLG6.TfSat01_TFREE.4311964			4564	8346
TfSat01	fLG6.TfSat01_TFREE.4314310			5952	9468
TfSat01	fLG6.TfSat01_TFREE.4343631			1696.5	5108
TfSat01	fLG6.TfSat01_TFREE.4362559			3279	765
TfSat01	fLG6.TfSat01_TFREE.4413670			4811	1714.5
TfSat01	fLG6.TfSat01_TFREE.4420069			1588	5014.5
TfSat01	fLG6.TfSat01_TFREE.4438944			8037.5	2013
TfSat01	fLG6.TfSat01_TFREE.4468536			9657	836
TfSat01	fLG6.TfSat01_TFREE.4480683			3331.67	4464.33
TfSat01	fLG6.TfSat01_TFREE.4482509			3940.33	5126.67
TfSat01	fLG6.TfSat01_TFREE.4484393			4568.33	5766.67
TfSat01	fLG6.TfSat01_TFREE.4488199			811	3219
TfSat01	fLG6.TfSat01_TFREE.4489793			5598	5459.5
TfSat01	fLG6.TfSat01_TFREE.4513557			8172	1596.5
TfSat01	fLG6.TfSat01_TFREE.4523583			1854	8150.5
TfSat01	fLG6.TfSat01_TFREE.4528331			7030.5	1706
TfSat01	fLG6.TfSat01_TFREE.4536961			1599.5	6506
TfSat01	fLG6.TfSat01_TFREE.4540576			8127	1669.5
TfSat01	fLG6.TfSat01_TFREE.4574426			1815	8364.5
TfSat01	fLG6.TfSat01_TFREE.4627127			746	3154
TfSat01	fLG6.TfSat01_TFREE.4641232			1487.5	4420
TfSat01	fLG6.TfSat01_TFREE.4643352			3607.5	6540
TfSat01	fLG6.TfSat01_TFREE.4652778			5137	1824
TfSat01	fLG6.TfSat01_TFREE.4668740			5107.5	1796.5
TfSat01	fLG6.TfSat01_TFREE.4675359			3922	4708.67
TfSat01	fLG6.TfSat01_TFREE.4676627			4344.67	6009.33
TfSat01	fLG6.TfSat01_TFREE.4684887			785	4387
TfSat01	fLG6.TfSat01_TFREE.4708715			9265	5573
TfSat01	fLG6.TfSat01_TFREE.4711314			7669	1551
TfSat01	fLG6.TfSat01_TFREE.4720816			1833	6311
TfSat01	fLG6.TfSat01_TFREE.4757341			9834	6320
TfSat01	fLG6.TfSat01_TFREE.4759347			8715	4600.5
TfSat01	fLG6.TfSat01_TFREE.4761911			6151	1709.5
TfSat01	fLG6.TfSat01_TFREE.4780728			7811.5	1494
TfSat01	fLG6.TfSat01_TFREE.4790193			4170.67	5300
TfSat01	fLG6.TfSat01_TFREE.4791881			4733.33	6797
TfSat01	fLG6.TfSat01_TFREE.4796400			2998	209
TfSat01	fLG6.TfSat01_TFREE.4800228			4882	4745
TfSat01	fLG6.TfSat01_TFREE.4801656			6425.33	3914
TfSat01	fLG6.TfSat01_TFREE.4811950			1785	7601
TfSat01	fLG6.TfSat01_TFREE.4847857			4986.5	1585
TfSat01	fLG6.TfSat01_TFREE.4862892			6378	783
TfSat01	fLG6.TfSat01_TFREE.4869285			15	4761
TfSat01	fLG6.TfSat01_TFREE.4882407			8779	99
TfSat01	fLG6.TfSat01_TFREE.4911409			6202.5	2721
TfSat01	fLG6.TfSat01_TFREE.4920031			3238	3282
TfSat01	fLG6.TfSat01_TFREE.4926519			9367	94
TfSat01	fLG6.TfSat01_TFREE.4936656			2984.5	2984.5
TfSat01	fLG6.TfSat01_TFREE.4942649			794	6888
TfSat01	fLG6.TfSat01_TFREE.4947742			9977	755
TfSat01	fLG6.TfSat01_TFREE.4959816			1510	5630
TfSat01	fLG6.TfSat01_TFREE.4979324			9456	209
TfSat01	fLG6.TfSat01_TFREE.4989532			752	2826
TfSat01	fLG6.TfSat01_TFREE.5004179			3946.67	5905
TfSat01	fLG6.TfSat01_TFREE.5009422			4865.33	3712.33
TfSat01	fLG6.TfSat01_TFREE.5031981			7671	1390.5
TfSat01	fLG6.TfSat01_TFREE.5070365			1861	8072.5
TfSat01	fLG6.TfSat01_TFREE.5075297			8507	824
TfSat01	fLG6.TfSat01_TFREE.5086637			1830	5973
TfSat01	fLG6.TfSat01_TFREE.5121320			9429	734
TfSat01	fLG6.TfSat01_TFREE.5158046			9440	209
TfSat01	fLG6.TfSat01_TFREE.5168291			805	2713
TfSat01	fLG6.TfSat01_TFREE.5169384			9812	802
TfSat01	fLG6.TfSat01_TFREE.5212377			9053	2843
TfSat01	fLG6.TfSat01_TFREE.5217182			4965.5	1655
TfSat01	fLG6.TfSat01_TFREE.5232980			5120.5	1808.5
TfSat01	fLG6.TfSat01_TFREE.5239594			3900.33	4687
TfSat01	fLG6.TfSat01_TFREE.5240862			4323	5988
TfSat01	fLG6.TfSat01_TFREE.5249093			785	4387
TfSat01	fLG6.TfSat01_TFREE.5284456			1832	6099.5
TfSat01	fLG6.TfSat01_TFREE.5313370			8907	4960
TfSat01	fLG6.TfSat01_TFREE.5315935			6342	1565
TfSat01	fLG6.TfSat01_TFREE.5332518			8367	845
TfSat01	fLG6.TfSat01_TFREE.5343389			1659.5	5812	1980	898
TfSat01	fLG6.TfSat01_TFREE.5360893			1800	8113.5
TfSat01	fLG6.TfSat01_TFREE.5395172			6281	1800.5
TfSat01	fLG6.TfSat01_TFREE.5419509			5016.5	1584.5
TfSat01	fLG6.TfSat01_TFREE.5426133			1607.5	7685.5
TfSat01	fLG6.TfSat01_TFREE.5430888			5555	798
TfSat01	fLG6.TfSat01_TFREE.5436458			15	3751
TfSat01	fLG6.TfSat01_TFREE.5450968			5312	1381.5
TfSat01	fLG6.TfSat01_TFREE.5476141			4740	806
TfSat01	fLG6.TfSat01_TFREE.5504302			4426.33	5744.33
TfSat01	fLG6.TfSat01_TFREE.5506731			8033.5	1514.5
TfSat01	fLG6.TfSat01_TFREE.5547682			8351.5	1648.5
TfSat01	fLG6.TfSat01_TFREE.5557431			1397.5	8023.5
TfSat01	fLG6.TfSat01_TFREE.5576203			1790.5	4604.5
TfSat01	fLG6.TfSat01_TFREE.5584659			9310	6770
TfSat01	fLG6.TfSat01_TFREE.5585833			9025	1669
TfSat01	fLG6.TfSat01_TFREE.5596671			1813	7530
TfSat01	fLG6.TfSat01_TFREE.5616081			1917	7688
TfSat01	fLG6.TfSat01_TFREE.5649466			8452	758
TfSat01	fLG6.TfSat01_TFREE.5660596			1844	7845.5
TfSat01	fLG6.TfSat01_TFREE.5684532			1380.5	6318.5
TfSat01	fLG6.TfSat01_TFREE.5701724			1353.5	5085.5
TfSat01	fLG6.TfSat01_TFREE.5751835			1761.5	6373
TfSat01	fLG6.TfSat01_TFREE.5755115			9116	762
TfSat01	fLG6.TfSat01_TFREE.5766908			1388	5155
TfSat01	fLG6.TfSat01_TFREE.5812460			3736.67	5399
TfSat01	fLG6.TfSat01_TFREE.5820106			99	4023
TfSat01	fLG6.TfSat01_TFREE.5834314			1281	7117
TfSat01	fLG6.TfSat01_TFREE.5866222			8359.5	1862
TfSat01	fLG6.TfSat01_TFREE.5876198			730	8429
TfSat01	fLG6.TfSat01_TFREE.5882549			8359	1859
TfSat01	fLG6.TfSat01_TFREE.5892525			730	8597
TfSat01	fLG6.TfSat01_TFREE.5899043			8809	99
TfSat01	fLG6.TfSat01_TFREE.5910009			1485.5	7059
TfSat01	fLG6.TfSat01_TFREE.5913949			9991	815
TfSat01	fLG6.TfSat01_TFREE.5927052			5162	5162.25
TfSat01	fLG6.TfSat01_TFREE.5936457			3526.33	5723
TfSat01	fLG6.TfSat01_TFREE.5941108			5076.67	6198.33
TfSat01	fLG6.TfSat01_TFREE.5944295			4679.5	4312.5
TfSat01	fLG6.TfSat01_TFREE.5955937			1603.5	8862
TfSat01	fLG6.TfSat01_TFREE.5961638			6541	1777.5
TfSat01	fLG6.TfSat01_TFREE.5969774			1595	8854.5
TfSat01	fLG6.TfSat01_TFREE.6005534			1243	6043.5
TfSat01	fLG6.TfSat01_TFREE.6008598			4307	8608.5
TfSat01	fLG6.TfSat01_TFREE.6011277			5842	9726
TfSat01	fLG6.TfSat01_TFREE.6025033			6116	1805
TfSat01	fLG6.TfSat01_TFREE.6043450			7684	883
TfSat01	fLG6.TfSat01_TFREE.6053012			1878	9183
TfSat01	fLG6.TfSat01_TFREE.6058779			7251.5	673.5
TfSat01	fLG6.TfSat01_TFREE.6067838			1807.5	5572.5
TfSat01	fLG6.TfSat01_TFREE.6077793			8796	6257
TfSat01	fLG6.TfSat01_TFREE.6078967			8511	1649.5
TfSat01	fLG6.TfSat01_TFREE.6089282			1804	7019.5
TfSat01	fLG6.TfSat01_TFREE.6118854			4041.5	3748.5
TfSat01	fLG6.TfSat01_TFREE.6140148			8106.5	1273
TfSat01	fLG6.TfSat01_TFREE.6160673			5375	1558
TfSat01	fLG6.TfSat01_TFREE.6184188			8376	1876
TfSat01	fLG6.TfSat01_TFREE.6194192			741	9102
TfSat01	fLG6.TfSat01_TFREE.6201204			7695.5	1400.5	8612	4216
TfSat01	fLG6.TfSat01_TFREE.6210557			1657.5	8486.5	741	5671
TfSat01	fLG6.TfSat01_TFREE.6247400			1776.5	8650
TfSat01	fLG6.TfSat01_TFREE.6252836			8645.5	1490
TfSat01	fLG6.TfSat01_TFREE.6262773			1291.5	7466
TfSat01	fLG6.TfSat01_TFREE.6291581			5803	1890
TfSat01	fLG6.TfSat01_TFREE.6307317			7975	1878
TfSat01	fLG6.TfSat01_TFREE.6316083			791	3892
TfSat01	fLG6.TfSat01_TFREE.6339804			1392	7506
TfSat01	fLG6.TfSat01_TFREE.6376285					759.5	8851
TfSat01	fLG6.TfSat01_TFREE.6383556			5586.5	1356
TfSat01	fLG6.TfSat01_TFREE.6390599			5337.75	5540
TfSat01	fLG6.TfSat01_TFREE.6395863			4635	3821.33
TfSat01	fLG6.TfSat01_TFREE.6424309			5284.5	1802.5
TfSat01	fLG6.TfSat01_TFREE.6432132			4414	4540.5
TfSat01	fLG6.TfSat01_TFREE.6439872			733	3176
TfSat01	fLG6.TfSat01_TFREE.6441476			9700	357
TfSat01	fLG6.TfSat01_TFREE.6453667			1646.5	5132.5
TfSat01	fLG6.TfSat01_TFREE.6471252			8033	1340
TfSat01	fLG6.TfSat01_TFREE.6492363			5338.5	4869
TfSat01	fLG6.TfSat01_TFREE.6493957			5338.5	4869
TfSat01	fLG6.TfSat01_TFREE.6505046			805	8903
TfSat01	fLG6.TfSat01_TFREE.6556619			1677	7839.5
TfSat01	fLG6.TfSat01_TFREE.6579973			4456	1804.5
TfSat01	fLG6.TfSat01_TFREE.6586070			1641	7802.5
TfSat01	fLG6.TfSat01_TFREE.6606801			7390	482
TfSat01	fLG6.TfSat01_TFREE.6628533			3779	4146
TfSat01	fLG6.TfSat01_TFREE.6635964			2375.5	2376
TfSat01	fLG6.TfSat01_TFREE.6640712			5153.33	5863.67
TfSat01	fLG6.TfSat01_TFREE.6642306			4990.5	4851.5
TfSat01	fLG6.TfSat01_TFREE.6651044			1079	5610
TfSat01	fLG6.TfSat01_TFREE.6654483			9163	797
TfSat01	fLG6.TfSat01_TFREE.6666389			1837	5221
TfSat01	fLG6.TfSat01_TFREE.6668493			9971	1886
TfSat01	fLG6.TfSat01_TFREE.6679282			818	5412
TfSat01	fLG6.TfSat01_TFREE.6722893			9930	5988
TfSat01	fLG6.TfSat01_TFREE.6725237			8618	4647
TfSat01	fLG6.TfSat01_TFREE.6727467			6388	1753
TfSat01	fLG6.TfSat01_TFREE.6743464			4786.5	1642.5
TfSat01	fLG6.TfSat01_TFREE.6749775			3877.33	4552.33
TfSat01	fLG6.TfSat01_TFREE.6751043			4300	5797.67
TfSat01	fLG6.TfSat01_TFREE.6759143			785	4385
TfSat01	fLG6.TfSat01_TFREE.6776885			8331.5	1497
TfSat01	fLG6.TfSat01_TFREE.6787034			1817.5	6295
TfSat01	fLG6.TfSat01_TFREE.6823406			8378	1543.5
TfSat01	fLG6.TfSat01_TFREE.6833596			1812	6621.5
TfSat01	fLG6.TfSat01_TFREE.6874138			8370	4182
TfSat01	fLG6.TfSat01_TFREE.6876703			6693.5	1746.5
TfSat01	fLG6.TfSat01_TFREE.6895367			8033.5	1535
TfSat01	fLG6.TfSat01_TFREE.6904690			3824	5905.33
TfSat01	fLG6.TfSat01_TFREE.6908585			5122.33	6651.33
TfSat01	fLG6.TfSat01_TFREE.6910830			2753	209
TfSat01	fLG6.TfSat01_TFREE.6914391			4948	4810.5
TfSat01	fLG6.TfSat01_TFREE.6915985			6465.33	3958.33
TfSat01	fLG6.TfSat01_TFREE.6926282			1800	7276.5
TfSat01	fLG6.TfSat01_TFREE.6962105			5476.5	1818.5
TfSat01	fLG6.TfSat01_TFREE.6977658			7554.5	1495
TfSat01	fLG6.TfSat01_TFREE.7004790			4944.5	1797
TfSat01	fLG6.TfSat01_TFREE.7011234			782	9762
TfSat01	fLG6.TfSat01_TFREE.7019215			7442.5	1588
TfSat01	fLG6.TfSat01_TFREE.7028253			1595.5	8337
TfSat01	fLG6.TfSat01_TFREE.7033672			7048	789
TfSat01	fLG6.TfSat01_TFREE.7040735			4911	3360.67
TfSat01	fLG6.TfSat01_TFREE.7049901			1807	8359
TfSat01	fLG6.TfSat01_TFREE.7070105			8606	209
TfSat01	fLG6.TfSat01_TFREE.7079511			800	3209
TfSat01	fLG6.TfSat01_TFREE.7081105			5519.5	4792
TfSat01	fLG6.TfSat01_TFREE.7136348			1819	6130.5
TfSat01	fLG6.TfSat01_TFREE.7166246			9839	4143
TfSat01	fLG6.TfSat01_TFREE.7170320			6653.5	1712.5
TfSat01	fLG6.TfSat01_TFREE.7190466			8041.5	1547
TfSat01	fLG6.TfSat01_TFREE.7199792			4089.33	5835.33
TfSat01	fLG6.TfSat01_TFREE.7202646			4899	5505.5
TfSat01	fLG6.TfSat01_TFREE.7206830			2661	209
TfSat01	fLG6.TfSat01_TFREE.7210305			4880.5	4743
TfSat01	fLG6.TfSat01_TFREE.7211733			6428.67	3921.33
TfSat01	fLG6.TfSat01_TFREE.7222037			1782	8257.5
TfSat01	fLG6.TfSat01_TFREE.7227136			8961	777
TfSat01	fLG6.TfSat01_TFREE.7261699			5131.5	1818
TfSat01	fLG6.TfSat01_TFREE.7282430			7095.5	1578.5
TfSat01	fLG6.TfSat01_TFREE.7291144			1618.5	8363.5
TfSat01	fLG6.TfSat01_TFREE.7296567			7043	783
TfSat01	fLG6.TfSat01_TFREE.7303625			15	4761
TfSat01	fLG6.TfSat01_TFREE.7315411			7143	1375.5
TfSat01	fLG6.TfSat01_TFREE.7343594			5844	782
TfSat01	fLG6.TfSat01_TFREE.7351309			1871	8796
TfSat01	fLG6.TfSat01_TFREE.7424771			1804	8115
TfSat01	fLG6.TfSat01_TFREE.7429437			9813	788
TfSat01	fLG6.TfSat01_TFREE.7441732			1290.5	6968
TfSat01	fLG6.TfSat01_TFREE.7475828			8030.5	1870
TfSat01	fLG6.TfSat01_TFREE.7485476			1617.5	8425
TfSat01	fLG6.TfSat01_TFREE.7507920			1507.5	5587
TfSat01	fLG6.TfSat01_TFREE.7510336			9197	855
TfSat01	fLG6.TfSat01_TFREE.7520015			482	8059
TfSat01	fLG6.TfSat01_TFREE.7527871			7975.5	1481.5
TfSat01	fLG6.TfSat01_TFREE.7537645			1798.5	4281.5
TfSat01	fLG6.TfSat01_TFREE.7593002			8180.5	1847
TfSat01	fLG6.TfSat01_TFREE.7602840			770	9467
TfSat01	fLG6.TfSat01_TFREE.7610187			7694.5	1399.5
TfSat01	fLG6.TfSat01_TFREE.7619557			1675.5	7212.5
TfSat01	fLG6.TfSat01_TFREE.7650657			910	8791
TfSat01	fLG6.TfSat01_TFREE.7657098			7716.5	1252.5
TfSat01	fLG6.TfSat01_TFREE.7687650			1292	7139
TfSat01	fLG6.TfSat01_TFREE.7706103			777	9299
TfSat01	fLG6.TfSat01_TFREE.7713560			5220.5	1807.5
TfSat01	fLG6.TfSat01_TFREE.7720283			3946.67	5621
TfSat01	fLG6.TfSat01_TFREE.7724214			5319	4001.33
TfSat01	fLG6.TfSat01_TFREE.7731334			783	9806
TfSat01	fLG6.TfSat01_TFREE.7739267			9824	1896
TfSat01	fLG6.TfSat01_TFREE.7749882			791	4392
TfSat01	fLG6.TfSat01_TFREE.7764665					759.5	9522
TfSat01	fLG6.TfSat01_TFREE.7772607			9456	99
TfSat01	fLG6.TfSat01_TFREE.7784258			3811.33	6120.67
TfSat01	fLG6.TfSat01_TFREE.7789190			4619.5	4492
TfSat01	fLG6.TfSat01_TFREE.7807367			9885	2836
TfSat01	fLG6.TfSat01_TFREE.7812674			5295	1811.5
TfSat01	fLG6.TfSat01_TFREE.7819480			1511	5978.5
TfSat01	fLG6.TfSat01_TFREE.7841551			3071.33	4829.33
TfSat01	fLG6.TfSat01_TFREE.7844819			4160.67	5305
TfSat01	fLG6.TfSat01_TFREE.7847382			51	9123
TfSat01	fLG6.TfSat01_TFREE.7870438			4260	1278.5
TfSat01	fLG6.TfSat01_TFREE.7892231			9024	2476
TfSat01	fLG6.TfSat01_TFREE.7897035			4937	1788.5
TfSat01	fLG6.TfSat01_TFREE.7920789			8056	4630
TfSat01	fLG6.TfSat01_TFREE.7923074			5771	1676
TfSat01	fLG6.TfSat01_TFREE.7930383			3969.67	5810.33
TfSat01	fLG6.TfSat01_TFREE.7935647			4885.33	3728.67
TfSat01	fLG6.TfSat01_TFREE.7964572			6625.5	1809	8181	4776
TfSat01	fLG6.TfSat01_TFREE.7986621			7500	1913
TfSat01	fLG6.TfSat01_TFREE.7994924			5370.5	5322.5
TfSat01	fLG6.TfSat01_TFREE.7996863			8844	1161
TfSat01	fLG6.TfSat01_TFREE.8026701			6620	1812
TfSat01	fLG6.TfSat01_TFREE.8046873			7341	4241
TfSat01	fLG6.TfSat01_TFREE.8048578			5636	1335
TfSat01	fLG6.TfSat01_TFREE.8054994			780	7527
TfSat01	fLG6.TfSat01_TFREE.8060259			7004	1673
TfSat01	fLG6.TfSat01_TFREE.8068860			1597	6504
TfSat01	fLG6.TfSat01_TFREE.8072475			8265.5	1630
TfSat01	fLG6.TfSat01_TFREE.8090361			9102	737
TfSat01	fLG6.TfSat01_TFREE.8102175			1822.5	8202.5
TfSat01	fLG6.TfSat01_TFREE.8107203			6168	1632.5
TfSat01	fLG6.TfSat01_TFREE.8115145			1774	8324.5
TfSat01	fLG6.TfSat01_TFREE.8120345			8091	932
TfSat01	fLG6.TfSat01_TFREE.8129222			786	6638
TfSat01	fLG6.TfSat01_TFREE.8134079			8466.5	1723.5
TfSat01	fLG6.TfSat01_TFREE.8144157			4261	5714
TfSat01	fLG6.TfSat01_TFREE.8147271			6459	4248.67
TfSat01	fLG6.TfSat01_TFREE.8156420			1401	6036.5
TfSat01	fLG6.TfSat01_TFREE.8159291			8933	734
TfSat01	fLG6.TfSat01_TFREE.8186888			9357	2809
TfSat01	fLG6.TfSat01_TFREE.8191693			5269.5	1790
TfSat01	fLG6.TfSat01_TFREE.8207268			5433	1788
TfSat01	fLG6.TfSat01_TFREE.8214237			3688.67	4693
TfSat01	fLG6.TfSat01_TFREE.8215505			4111.33	5993.67
TfSat01	fLG6.TfSat01_TFREE.8223010			779	3728
TfSat01	fLG6.TfSat01_TFREE.8244162			1699	5298.5
TfSat01	fLG6.TfSat01_TFREE.8260943			7563	99
TfSat01	fLG6.TfSat01_TFREE.8298826			3543.67	6158.33
TfSat01	fLG6.TfSat01_TFREE.8307597			5506	5364
TfSat01	fLG6.TfSat01_TFREE.8319709			1832.5	8313.5
TfSat01	fLG6.TfSat01_TFREE.8337768			1812.5	6632.5
TfSat01	fLG6.TfSat01_TFREE.8341211			9738	99
TfSat01	fLG6.TfSat01_TFREE.8380091			4458	1807.5
TfSat01	fLG6.TfSat01_TFREE.8386215			1666	8497.5
TfSat01	fLG6.TfSat01_TFREE.8399988			8601	99
TfSat01	fLG6.TfSat01_TFREE.8419310			5098	1619
TfSat01	fLG6.TfSat01_TFREE.8425910			1502	7809
TfSat01	fLG6.TfSat01_TFREE.8455613			7131	1288
TfSat01	fLG6.TfSat01_TFREE.8464232			3872.33	5610.67
TfSat01	fLG6.TfSat01_TFREE.8468833			4706	3995
TfSat01	fLG6.TfSat01_TFREE.8473082			5108.67	3576
TfSat01	fLG6.TfSat01_TFREE.8511309			5412.5	1791
TfSat01	fLG6.TfSat01_TFREE.8531114			6947	1883
TfSat01	fLG6.TfSat01_TFREE.8538855			794	4397
TfSat01	fLG6.TfSat01_TFREE.8540794			9347	1886
TfSat01	fLG6.TfSat01_TFREE.8550947			806	4420
TfSat01	fLG6.TfSat01_TFREE.8572075			8669.5	1759.5
TfSat01	fLG6.TfSat01_TFREE.8582294			793	8660
TfSat01	fLG6.TfSat01_TFREE.8589069			8965	767
TfSat01	fLG6.TfSat01_TFREE.8600794			3868	4235.5
TfSat01	fLG6.TfSat01_TFREE.8608423			760	3169	7114	5555
TfSat01	fLG6.TfSat01_TFREE.8610017			9594	732	5520	2215
TfSat01	fLG6.TfSat01_TFREE.8622441			1827	6809.5
TfSat01	fLG6.TfSat01_TFREE.8626046			9765	759
TfSat01	fLG6.TfSat01_TFREE.8638609			1794.5	6612.5
TfSat01	fLG6.TfSat01_TFREE.8678264			4441	1790
TfSat01	fLG6.TfSat01_TFREE.8684384			791	8003
TfSat01	fLG6.TfSat01_TFREE.8700350			7986.5	1381
TfSat01	fLG6.TfSat01_TFREE.8720443			4946	1800
TfSat01	fLG6.TfSat01_TFREE.8726925			1536	8347
TfSat01	fLG6.TfSat01_TFREE.8745681			4487.67	5809
TfSat01	fLG6.TfSat01_TFREE.8748118			8110	1537
TfSat01	fLG6.TfSat01_TFREE.8758051			1823	5567
TfSat01	fLG6.TfSat01_TFREE.8760513			8614	762
TfSat01	fLG6.TfSat01_TFREE.8787569			4013	99
TfSat01	fLG6.TfSat01_TFREE.8841606			4768.5	1109.5
TfSat01	fLG6.TfSat01_TFREE.8847845			4041.33	6204
TfSat01	fLG6.TfSat01_TFREE.8853112			5422.67	4103.33
TfSat01	fLG6.TfSat01_TFREE.8879023			5488	1842
TfSat01	fLG6.TfSat01_TFREE.8896393			5486.5	1660.5
TfSat01	fLG6.TfSat01_TFREE.8903494			1614.5	6686.5
TfSat01	fLG6.TfSat01_TFREE.8907275			8112.5	1669.5
TfSat01	fLG6.TfSat01_TFREE.8916765			99	8628
TfSat01	fLG6.TfSat01_TFREE.8923162			5793.5	1642
TfSat01	fLG6.TfSat01_TFREE.8930839			1883.5	8380
TfSat01	fLG6.TfSat01_TFREE.8959343			738	9947
TfSat01	fLG6.TfSat01_TFREE.8966781			6152	1716.5
TfSat01	fLG6.TfSat01_TFREE.9004922					6400	1805
TfSat01	fLG6.TfSat01_TFREE.9009632					1690	1049
TfSat01	fLG6.TfSat01_TFREE.9024943			3670	1484	6406	3542
TfSat01	fLG6.TfSat01_TFREE.9033000			4387	7415	1651	5357
TfSat01	fLG6.TfSat01_TFREE.9122802			8331	1777.5
TfSat01	fLG6.TfSat01_TFREE.9132781					5297.5	3445.5
TfSat01	fLG6.TfSat01_TFREE.9164782			1651	6981.5
TfSat01	fLG6.TfSat01_TFREE.9168733			8501.5	1699
TfSat01	fLG6.TfSat01_TFREE.9178804			1569.5	7979
TfSat01	fLG6.TfSat01_TFREE.9200894			1803	5450.5
TfSat01	fLG6.TfSat01_TFREE.9226870			1662	5652.5
TfSat01	fLG6.TfSat01_TFREE.9229432			3503	9105
TfSat01	fLG6.TfSat01_TFREE.9245229			7955.5	1468
TfSat01	fLG6.TfSat01_TFREE.9254972			3986.67	5002
TfSat01	fLG6.TfSat01_TFREE.9255996			7361	14
TfSat01	fLG6.TfSat01_TFREE.9264130			1972	1915
TfSat01	fLG6.TfSat01_TFREE.9268053			752	6790
TfSat01	fLG6.TfSat01_TFREE.9285136			8577	3738
TfSat01	fLG6.TfSat01_TFREE.9287776			5937	99
TfSat01	fLG6.TfSat01_TFREE.9295272			6647.67	4656
TfSat01	fLG6.TfSat01_TFREE.9300370			4094	1278.5
TfSat01	fLG6.TfSat01_TFREE.9316132			6480	1717
TfSat01	fLG6.TfSat01_TFREE.9333912			4891	788
TfSat01	fLG6.TfSat01_TFREE.9340702			5521.67	4069.33
TfSat01	fLG6.TfSat01_TFREE.9343968			4433	3705.33
TfSat01	fLG6.TfSat01_TFREE.9349853			1818	6463
TfSat01	fLG6.TfSat01_TFREE.9403822			8759	4642.5
TfSat01	fLG6.TfSat01_TFREE.9406387			6194	1746.5
TfSat01	fLG6.TfSat01_TFREE.9451243			1288.5	5121.5
TfSat01	fLG6.TfSat01_TFREE.9453432			9182	2129
TfSat01	fLG6.TfSat01_TFREE.9459618			2996	209
TfSat01	fLG6.TfSat01_TFREE.9463377			4654	4517
TfSat01	fLG6.TfSat01_TFREE.9464971			4654	4517
TfSat01	fLG6.TfSat01_TFREE.9472698			776	6628
TfSat01	fLG6.TfSat01_TFREE.9477555			8358.5	1761.5
TfSat01	fLG6.TfSat01_TFREE.9487549			4387.33	5700.67
TfSat01	fLG6.TfSat01_TFREE.9490830			6635.67	4157
TfSat01	fLG6.TfSat01_TFREE.9500154			1406.5	6360.5
TfSat01	fLG6.TfSat01_TFREE.9529136			759	3167
TfSat01	fLG6.TfSat01_TFREE.9530730			9623	99
TfSat01	fLG6.TfSat01_TFREE.9542573			1502.5	5931.5
TfSat01	fLG6.TfSat01_TFREE.9545331			8817	808
TfSat01	fLG6.TfSat01_TFREE.9574736			9375	2827
TfSat01	fLG6.TfSat01_TFREE.9579541			5288	1808
TfSat01	fLG6.TfSat01_TFREE.9595454			5433	1787.5
TfSat01	fLG6.TfSat01_TFREE.9602424			3718.33	4723
TfSat01	fLG6.TfSat01_TFREE.9603692			4141	6023.67
TfSat01	fLG6.TfSat01_TFREE.9611284			779	3728
TfSat01	fLG6.TfSat01_TFREE.9628751			1699	5296
TfSat01	fLG6.TfSat01_TFREE.9645708			7747	802
TfSat01	fLG6.TfSat01_TFREE.9656005			99	9399
TfSat01	fLG6.TfSat01_TFREE.9680249			9214	209
TfSat01	fLG6.TfSat01_TFREE.9690262			799	2874
TfSat01	fLG6.TfSat01_TFREE.9705443			1817	8460
TfSat01	fLG6.TfSat01_TFREE.9710709			9431	100
TfSat01	fLG6.TfSat01_TFREE.9722986			1842.5	6992
TfSat01	fLG6.TfSat01_TFREE.9726429			9738	99
TfSat01	fLG6.TfSat01_TFREE.9765883			4473	1822.5
TfSat01	fLG6.TfSat01_TFREE.9772031			1675	6338.5
TfSat01	fLG6.TfSat01_TFREE.9784511			8789	99
TfSat01	fLG6.TfSat01_TFREE.9814527			4912	1601.5
TfSat01	fLG6.TfSat01_TFREE.9820965			1526	7832.5
TfSat01	fLG6.TfSat01_TFREE.9852024			7137.5	1291
TfSat01	fLG6.TfSat01_TFREE.9860647			3646.33	5220.33
TfSat01	fLG6.TfSat01_TFREE.9864745			5012.33	5640.33
TfSat01	fLG6.TfSat01_TFREE.9868824			5114.33	3581
TfSat01	fLG6.TfSat01_TFREE.9877905			1514	8929.5
TfSat01	fLG6.TfSat01_TFREE.9900245			5084	1797
TfSat01	fLG6.TfSat01_TFREE.9921914			6940	1877
TfSat01	fLG6.TfSat01_TFREE.9929654			5200.5	5485.5
TfSat01	fLG6.TfSat01_TFREE.9931256			8775	1509
TfSat01	fLG6.TfSat01_TFREE.9941750			1719	5138
TfSat01	fLG6.TfSat01_TFREE.9981157			838	8704
TfSat01	fLG6.TfSat01_TFREE.9987932			5265.5	1613
TfSat01	fLG6.TfSat01_TFREE.9994464			1266.5	8264
TfSat01	fLG7.TfSat01_TFREE.27576216			4888	575	3894.14	5290.14
TfSat01	fLG7.TfSat01_TFREE.27694534			1258	5242
TfSat01	fLG7.TfSat01_TFREE.27697185			8647	789
TfSat01	fLG7.TfSat01_TFREE.27707090			1258	5074
TfSat01	fLG7.TfSat01_TFREE.27725977			784	4153
TfSat01	fLG7.TfSat01_TFREE.27761843			4991.5	4679.5
TfSat01	fLG7.TfSat01_TFREE.27765294			6993.5	4150.5
TfSat01	fLG7.TfSat01_TFREE.27984749			426	6964	2532.4	8274.6
TfSat01	fLG7.TfSat01_TFREE.28025185			5132	1815.5
TfSat01	fLG7.TfSat01_TFREE.28043786			5447.5	1800.5
TfSat01	fLG7.TfSat01_TFREE.28050745			5238	5076
TfSat01	fLG7.TfSat01_TFREE.28056886			5263.33	4310
TfSat01	fLG7.TfSat01_TFREE.28062976			1664	6701.5
TfSat01	fLG7.TfSat01_TFREE.28111269			4892.5	1746
TfSat01	fLG7.TfSat01_TFREE.28117640			761	9113
TfSat01	fLG7.TfSat01_TFREE.28124900			9813	791
TfSat01	fLG7.TfSat01_TFREE.28137568			4952.25	4952.25
TfSat01	fLG7.TfSat01_TFREE.28139163			4952.25	4952.25
TfSat01	fLG7.TfSat01_TFREE.28147445			1892.5	5637
TfSat01	fLG7.TfSat01_TFREE.28149907			8460	774
TfSat01	fLG7.TfSat01_TFREE.28169935			5869	1892.5
TfSat01	fLG7.TfSat01_TFREE.28186292	6757	32			9372.5	2170
TfSat01	fLG7.TfSat01_TFREE.28208445			4570.5	1470.5
TfSat01	fLG7.TfSat01_TFREE.28229109			4971	1823
TfSat01	fLG7.TfSat01_TFREE.28235546			1466	7610
TfSat01	fLG7.TfSat01_TFREE.28253140			4380	5697
TfSat01	fLG7.TfSat01_TFREE.28255566			7797.5	1467.5
TfSat01	fLG7.TfSat01_TFREE.28265342			1978.5	5645.5
TfSat01	fLG7.TfSat01_TFREE.28267804			8654	801
TfSat01	fLG7.TfSat01_TFREE.28278915			1623	8773.5
TfSat01	fLG7.TfSat01_TFREE.28284858			5683	1706
TfSat01	fLG7.TfSat01_TFREE.28291601			101	8607
TfSat01	fLG7.TfSat01_TFREE.28298532			7172.5	1490
TfSat01	fLG7.TfSat01_TFREE.28306589			3685.75	3314.5
TfSat01	fLG7.TfSat01_TFREE.28314725			761	8952
TfSat01	fLG7.TfSat01_TFREE.28334470			4503.67	5551.67
TfSat01	fLG7.TfSat01_TFREE.28336065			9041	1475.5
TfSat01	fLG7.TfSat01_TFREE.28346993			1887	7612.5
TfSat01	fLG7.TfSat01_TFREE.28351421			7261.5	1499
TfSat01	fLG7.TfSat01_TFREE.28359534			4749.75	4419
TfSat01	fLG7.TfSat01_TFREE.28380156			5448	1800
TfSat01	fLG7.TfSat01_TFREE.28397678			9995	806
TfSat01	fLG7.TfSat01_TFREE.28410486			1878.5	5613.5
TfSat01	fLG7.TfSat01_TFREE.28422162			7477	1649
TfSat01	fLG7.TfSat01_TFREE.28431442			1803	4454
TfSat01	fLG7.TfSat01_TFREE.28451169			1774	4426	9744	8013
TfSat01	fLG7.TfSat01_TFREE.28452193					9317.5	445
TfSat01	fLG7.TfSat01_TFREE.28462270					162	9273
TfSat01	fLG7.TfSat01_TFREE.28470374			9867	99
TfSat01	fLG7.TfSat01_TFREE.28482480			4017.67	6463.67
TfSat01	fLG7.TfSat01_TFREE.28487913			4942	4018.33
TfSat01	fLG7.TfSat01_TFREE.28513426			9915	2849
TfSat01	fLG7.TfSat01_TFREE.28518749			5309	1827
TfSat01	fLG7.TfSat01_TFREE.28525519			1461	3918
TfSat01	fLG7.TfSat01_TFREE.28546757			1829	4480
TfSat01	fLG7.TfSat01_TFREE.28561291			1750	4401.5
TfSat01	fLG7.TfSat01_TFREE.28562315					9059	34
TfSat01	fLG7.TfSat01_TFREE.28572731					759.5	9347
TfSat01	fLG7.TfSat01_TFREE.28580498			8995	1390
TfSat01	fLG7.TfSat01_TFREE.28591017			3957.67	6374
TfSat01	fLG7.TfSat01_TFREE.28596282			4876	3951
TfSat01	fLG7.TfSat01_TFREE.28622715			9767	2869
TfSat01	fLG7.TfSat01_TFREE.28627869			5330	1848.5
TfSat01	fLG7.TfSat01_TFREE.28634712			1513	3992.5
TfSat01	fLG7.TfSat01_TFREE.28650699			2735.33	4210
TfSat01	fLG7.TfSat01_TFREE.28653797			3768	4630.67
TfSat01	fLG7.TfSat01_TFREE.28672798			4885	4976
TfSat01	fLG7.TfSat01_TFREE.28678902			4923.67	4144.67
TfSat01	fLG7.TfSat01_TFREE.28712543			5288	1806
TfSat01	fLG7.TfSat01_TFREE.28730744			5279	1803
TfSat01	fLG7.TfSat01_TFREE.28737511			5310	5025.5
TfSat01	fLG7.TfSat01_TFREE.28743820			5312.33	4277.33
TfSat01	fLG7.TfSat01_TFREE.28749922			1673	7835
TfSat01	fLG7.TfSat01_TFREE.28776787			9109	99
TfSat01	fLG7.TfSat01_TFREE.28801612			5451.5	1802
TfSat01	fLG7.TfSat01_TFREE.28808569			1505.5	7806	5277	388
TfSat01	fLG7.TfSat01_TFREE.28813492					354	7879
TfSat01	fLG7.TfSat01_TFREE.28825648			1078.5	3702
TfSat01	fLG7.TfSat01_TFREE.28845410			4248	5572
TfSat01	fLG7.TfSat01_TFREE.28847837			6074.33	4183.67
TfSat01	fLG7.TfSat01_TFREE.28857128			1881	5626
TfSat01	fLG7.TfSat01_TFREE.28882661			6026	1880.5
TfSat01	fLG7.TfSat01_TFREE.28899355			6124	776
TfSat01	fLG7.TfSat01_TFREE.28919443			1379	7983.5
TfSat01	fLG7.TfSat01_TFREE.28938609			8158	1652
TfSat01	fLG7.TfSat01_TFREE.28963776					9036.5	445
TfSat01	fLG7.TfSat01_TFREE.28995531			5196.25	5423.5
TfSat01	fLG7.TfSat01_TFREE.28999960			4708.33	3727.33
TfSat01	fLG7.TfSat01_TFREE.29030065			5313	1830
TfSat01	fLG7.TfSat01_TFREE.29036869			1491	3971
TfSat01	fLG7.TfSat01_TFREE.29054217			4065.67	5665
TfSat01	fLG7.TfSat01_TFREE.29057315			5098.33	6141
TfSat01	fLG7.TfSat01_TFREE.29059239			4932	5068
TfSat01	fLG7.TfSat01_TFREE.29060837			2480	99
TfSat01	fLG7.TfSat01_TFREE.29078304			5322.5	5624.5
TfSat01	fLG7.TfSat01_TFREE.29083244			4562.67	4013.33
TfSat01	fLG7.TfSat01_TFREE.29108729			5137	1821
TfSat01	fLG7.TfSat01_TFREE.29128505			5447.5	1800
TfSat01	fLG7.TfSat01_TFREE.29135446			1493.5	8803
TfSat01	fLG7.TfSat01_TFREE.29141378			5448.67	4409
TfSat01	fLG7.TfSat01_TFREE.29156835			9952	773
TfSat01	fLG7.TfSat01_TFREE.29169590			1800	5448
TfSat01	fLG7.TfSat01_TFREE.29190369			4419	4750.5
TfSat01	fLG7.TfSat01_TFREE.29199314			1490	7585.5
TfSat01	fLG7.TfSat01_TFREE.29204245			7819	1058
TfSat01	fLG7.TfSat01_TFREE.29214000			1936	5861
TfSat01	fLG7.TfSat01_TFREE.29228732			4189	6017.33
TfSat01	fLG7.TfSat01_TFREE.29233356			5556.67	4236
TfSat01	fLG7.TfSat01_TFREE.29240446			750	9776
TfSat01	fLG7.TfSat01_TFREE.29248406			5622.5	1877.5
TfSat01	fLG7.TfSat01_TFREE.29255493			1464.5	8706.5
TfSat01	fLG7.TfSat01_TFREE.29261426			5675.5	1940.5
TfSat01	fLG7.TfSat01_TFREE.29276832			8777	758
TfSat01	fLG7.TfSat01_TFREE.29288424			1812	5626
TfSat01	fLG7.TfSat01_TFREE.29308241			4417.75	4748
TfSat01	fLG7.TfSat01_TFREE.29317175			1478.5	8016.5
TfSat01	fLG7.TfSat01_TFREE.29322548			8152.5	1058
TfSat01	fLG7.TfSat01_TFREE.29332639			1938.5	6029
TfSat01	fLG7.TfSat01_TFREE.29335234			8894	789
TfSat01	fLG7.TfSat01_TFREE.29355808			5625	1880.5
TfSat01	fLG7.TfSat01_TFREE.29372857			6973	3156
TfSat01	fLG7.TfSat01_TFREE.29384648			741	8600
TfSat01	fLG7.TfSat01_TFREE.29391415			5482.5	1913.5
TfSat01	fLG7.TfSat01_TFREE.29407002			8138.5	1492
TfSat01	fLG7.TfSat01_TFREE.29416615			1474.5	4795
TfSat01	fLG7.TfSat01_TFREE.29493021			6988	1661
TfSat01	fLG7.TfSat01_TFREE.29502636			5782.33	3778.33
TfSat01	fLG7.TfSat01_TFREE.29512390			1892.5	5637.5
TfSat01	fLG7.TfSat01_TFREE.29528988			1907.5	8154
TfSat01	fLG7.TfSat01_TFREE.29533926			6056.5	1910
TfSat01	fLG7.TfSat01_TFREE.29541039			98	9272
TfSat01	fLG7.TfSat01_TFREE.29548637			7459	1484.5
TfSat01	fLG7.TfSat01_TFREE.29557857			1761	5409.5
TfSat01	fLG7.TfSat01_TFREE.29575491			1378	7981
TfSat01	fLG7.TfSat01_TFREE.29606622			1825	8243.5
TfSat01	fLG7.TfSat01_TFREE.29611393			9138.5	1490
TfSat01	fLG7.TfSat01_TFREE.29622178			1646.5	6477
TfSat01	fLG7.TfSat01_TFREE.29656066			3670.67	4539.33
TfSat01	fLG7.TfSat01_TFREE.29657327			5327.75	5100.25
TfSat01	fLG7.TfSat01_TFREE.29666464			99	9464
TfSat01	fLG7.TfSat01_TFREE.29689050			752	9115
TfSat01	fLG7.TfSat01_TFREE.29696065			7710	1407
TfSat01	fLG7.TfSat01_TFREE.29705457			1682	7729
TfSat01	fLG7.TfSat01_TFREE.29730854			5025.5	5026
TfSat01	fLG7.TfSat01_TFREE.29733671			5025.5	5026
TfSat01	fLG7.TfSat01_TFREE.29749999			7038.5	1756
TfSat01	fLG7.TfSat01_TFREE.29758440			1402.5	7608	6729	2310
TfSat01	fLG7.TfSat01_TFREE.29762974			9124	755	2195	4711
TfSat01	fLG7.TfSat01_TFREE.29784401			9466	99
TfSat01	fLG7.TfSat01_TFREE.29796046			3868.33	6290.67
TfSat01	fLG7.TfSat01_TFREE.29801309			4967.67	3890.67
TfSat01	fLG7.TfSat01_TFREE.29837772			6479	1649
TfSat01	fLG7.TfSat01_TFREE.29845738			770	9125
TfSat01	fLG7.TfSat01_TFREE.29853002			7591	1840.5
TfSat01	fLG7.TfSat01_TFREE.29879396			7984	1379
TfSat01	fLG7.TfSat01_TFREE.29897913			5406	1758
TfSat01	fLG7.TfSat01_TFREE.29904806			1487	7463
TfSat01	fLG7.TfSat01_TFREE.29909405			9774	99
TfSat01	fLG7.TfSat01_TFREE.29930376			5640	1895.5	8162	5086
TfSat01	fLG7.TfSat01_TFREE.29939096			3080	8207.5	558	5017
TfSat01	fLG7.TfSat01_TFREE.29944740					6202	9115
TfSat01	fLG7.TfSat01_TFREE.30012157			5177	1815
TfSat01	fLG7.TfSat01_TFREE.30018125			791	7813
TfSat01	fLG7.TfSat01_TFREE.30024056			9461	770
TfSat01	fLG7.TfSat01_TFREE.30036389			4406.33	5724
TfSat01	fLG7.TfSat01_TFREE.30038816			7851.5	1458
TfSat01	fLG7.TfSat01_TFREE.30048584			1916.5	5661
TfSat01	fLG7.TfSat01_TFREE.30051046			9130	768
TfSat01	fLG7.TfSat01_TFREE.30062980			1869	5614.5
TfSat01	fLG7.TfSat01_TFREE.30089359			5660	1918.5
TfSat01	fLG7.TfSat01_TFREE.30096077			1058	8152.5
TfSat01	fLG7.TfSat01_TFREE.30101676			7188	1519
TfSat01	fLG7.TfSat01_TFREE.30109656			4718.25	4340.75
TfSat01	fLG7.TfSat01_TFREE.30131949			5466	1818
TfSat01	fLG7.TfSat01_TFREE.30138887			4120	6151.67
TfSat01	fLG7.TfSat01_TFREE.30143319			5675.33	4133
TfSat01	fLG7.TfSat01_TFREE.30151138			4273.67	5592
TfSat01	fLG7.TfSat01_TFREE.30153565			6150.33	4202.33
TfSat01	fLG7.TfSat01_TFREE.30162996			1901	5646
TfSat01	fLG7.TfSat01_TFREE.30165458			9133	774
TfSat01	fLG7.TfSat01_TFREE.30177413			1887.5	5631
TfSat01	fLG7.TfSat01_TFREE.30179875			9135.5	1506.5
TfSat01	fLG7.TfSat01_TFREE.30199266			5356.5	1767
TfSat01	fLG7.TfSat01_TFREE.30205682			1059.5	7987
TfSat01	fLG7.TfSat01_TFREE.30211281			7237	1463
TfSat01	fLG7.TfSat01_TFREE.30219380			4755.5	4429.25
TfSat01	fLG7.TfSat01_TFREE.30241678			5466	1818
TfSat01	fLG7.TfSat01_TFREE.30248616			1472	7281
TfSat01	fLG7.TfSat01_TFREE.30265958			4210.33	5527.33
TfSat01	fLG7.TfSat01_TFREE.30268385			6042	4145
TfSat01	fLG7.TfSat01_TFREE.30277642			1880.5	5128
TfSat01	fLG7.TfSat01_TFREE.30279606			9102	744
TfSat01	fLG7.TfSat01_TFREE.30291527			4238	5615
TfSat01	fLG7.TfSat01_TFREE.30294157			5960	4186
TfSat01	fLG7.TfSat01_TFREE.30302931			789	8731
TfSat01	fLG7.TfSat01_TFREE.30309548			6022	1930
TfSat01	fLG7.TfSat01_TFREE.30316629			1059	8319
TfSat01	fLG7.TfSat01_TFREE.30322392			6138.5	1381.5
TfSat01	fLG7.TfSat01_TFREE.30342019			5451	1803
TfSat01	fLG7.TfSat01_TFREE.30348951			764	9946
TfSat01	fLG7.TfSat01_TFREE.30370397			1926	5829
TfSat01	fLG7.TfSat01_TFREE.30372991			9449	758	7514	50
TfSat01	fLG7.TfSat01_TFREE.30385246			1803	5451	4741	6977
TfSat01	fLG7.TfSat01_TFREE.30409651			1791.5	5090.5
TfSat01	fLG7.TfSat01_TFREE.30435103			3641.33	4307.67
TfSat01	fLG7.TfSat01_TFREE.30436531			5345.25	5131
TfSat01	fLG7.TfSat01_TFREE.30459503			7069	4145.5
TfSat01	fLG7.TfSat01_TFREE.30460931			5641	1715.5
TfSat01	fLG7.TfSat01_TFREE.30477454			2976	782
TfSat01	fLG7.TfSat01_TFREE.30481585			1155	4352
TfSat01	fLG7.TfSat01_TFREE.30483610			3180	9989
TfSat01	fLG7.TfSat01_TFREE.30513180			3934.33	4692.33
TfSat01	fLG7.TfSat01_TFREE.30514444			6407.67	3707
TfSat01	fLG7.TfSat01_TFREE.30524433			99	9296
TfSat01	fLG7.TfSat01_TFREE.30542654					34	9271
TfSat01	fLG7.TfSat01_TFREE.30570999			4448	1796
TfSat01	fLG7.TfSat01_TFREE.30577094			1647	8653
TfSat01	fLG7.TfSat01_TFREE.30607290			7708	1378.5
TfSat01	fLG7.TfSat01_TFREE.30616355			4943	4843
TfSat01	fLG7.TfSat01_TFREE.30626285			788	5970
TfSat01	fLG7.TfSat01_TFREE.30630385			8779	99
TfSat01	fLG7.TfSat01_TFREE.30641997			1898.5	6044
TfSat01	fLG7.TfSat01_TFREE.30659757			1523.5	8831.5
TfSat01	fLG7.TfSat01_TFREE.30665714			5362.5	1808
TfSat01	fLG7.TfSat01_TFREE.30672518			4023.67	5793.67
TfSat01	fLG7.TfSat01_TFREE.30676783			5437	4119
TfSat01	fLG7.TfSat01_TFREE.30695830			3705	1080
TfSat01	fLG7.TfSat01_TFREE.30701004					7879	513
TfSat01	fLG7.TfSat01_TFREE.30709430			8443	1469	547	6110
TfSat01	fLG7.TfSat01_TFREE.30719610			1737	5385
TfSat01	fLG7.TfSat01_TFREE.30743931			241	9777
TfSat01	fLG7.TfSat01_TFREE.30774498			7494	1502
TfSat01	fLG7.TfSat01_TFREE.30783795			1803	6279
TfSat01	fLG7.TfSat01_TFREE.30801891			1809.5	5124.5
TfSat01	fLG7.TfSat01_TFREE.30832059			3698.33	4473.33
TfSat01	fLG7.TfSat01_TFREE.30833487			5347.5	5214.75
TfSat01	fLG7.TfSat01_TFREE.30856017			7721	4797.5
TfSat01	fLG7.TfSat01_TFREE.30857445			6293	1699.5
TfSat01	fLG7.TfSat01_TFREE.30881241			1827	5308
TfSat01	fLG7.TfSat01_TFREE.30883265			2848	9582
TfSat01	fLG7.TfSat01_TFREE.30910708			3952.67	4876.67
TfSat01	fLG7.TfSat01_TFREE.30912135			6304.67	3955.67
TfSat01	fLG7.TfSat01_TFREE.30921771			1289	8793.5
TfSat01	fLG7.TfSat01_TFREE.30927704					6003	759.5
TfSat01	fLG7.TfSat01_TFREE.30947637			4411	1777
TfSat01	fLG7.TfSat01_TFREE.30962153			4442.5	1790.5
TfSat01	fLG7.TfSat01_TFREE.30968257					4440	6185
TfSat01	fLG7.TfSat01_TFREE.30979211			3931.5	1475	6514	7559
TfSat01	fLG7.TfSat01_TFREE.30984970			1827.5	5247
TfSat01	fLG7.TfSat01_TFREE.30986932			2786	8685
TfSat01	fLG7.TfSat01_TFREE.31015694			3941.67	4866.33
TfSat01	fLG7.TfSat01_TFREE.31017121			6162.67	3939
TfSat01	fLG7.TfSat01_TFREE.31027052			1794	4942
TfSat01	fLG7.TfSat01_TFREE.31045678			3166.33	5782.33
TfSat01	fLG7.TfSat01_TFREE.31054290			1873	7710
TfSat01	fLG7.TfSat01_TFREE.31058888			7706	1058
TfSat01	fLG7.TfSat01_TFREE.31068324			1730	5707
TfSat01	fLG7.TfSat01_TFREE.31070919			9059	786
TfSat01	fLG7.TfSat01_TFREE.31082238			825	9180
TfSat01	fLG7.TfSat01_TFREE.31089528			5627	1955
TfSat01	fLG7.TfSat01_TFREE.31096625			4197.67	6322.33
TfSat01	fLG7.TfSat01_TFREE.31101724			5465.33	4260
TfSat01	fLG7.TfSat01_TFREE.31108502			788	9984
TfSat01	fLG7.TfSat01_TFREE.31116605			8464	1490
TfSat01	fLG7.TfSat01_TFREE.31126877			1808	4956
TfSat01	fLG7.TfSat01_TFREE.31146086			782	9471
TfSat01	fLG7.TfSat01_TFREE.31168798			1962.5	6053.5
TfSat01	fLG7.TfSat01_TFREE.31183705			1501	8470
TfSat01	fLG7.TfSat01_TFREE.31189492			5509	1807
TfSat01	fLG7.TfSat01_TFREE.31196482			4126.33	6216.33
TfSat01	fLG7.TfSat01_TFREE.31201747			5255.33	4215	6423	4862
TfSat01	fLG7.TfSat01_TFREE.31208120					50	8180
TfSat01	fLG7.TfSat01_TFREE.31222505			9443	776
TfSat01	fLG7.TfSat01_TFREE.31234613			1382	6478
TfSat01	fLG7.TfSat01_TFREE.31237883			8713	1061
TfSat01	fLG7.TfSat01_TFREE.31248335			1739	5719
TfSat01	fLG7.TfSat01_TFREE.31250930			8896	789
TfSat01	fLG7.TfSat01_TFREE.31261950			688	8542
TfSat01	fLG7.TfSat01_TFREE.31268738			5599.5	1932.5
TfSat01	fLG7.TfSat01_TFREE.31275802			1464.5	7793.5
TfSat01	fLG7.TfSat01_TFREE.31280900			5708.33	4391
TfSat01	fLG7.TfSat01_TFREE.31288045			788	9979
TfSat01	fLG7.TfSat01_TFREE.31296145			8461.5	1487
TfSat01	fLG7.TfSat01_TFREE.31306412			1805.5	4954
TfSat01	fLG7.TfSat01_TFREE.31325302			788	9310
TfSat01	fLG7.TfSat01_TFREE.31346656			1877.5	6025
TfSat01	fLG7.TfSat01_TFREE.31349251			9104	825
TfSat01	fLG7.TfSat01_TFREE.31370871			5889	2032
TfSat01	fLG7.TfSat01_TFREE.31378244			4123.33	6316.67
TfSat01	fLG7.TfSat01_TFREE.31383508			5246.67	4206.67
TfSat01	fLG7.TfSat01_TFREE.31389906			827	8855
TfSat01	fLG7.TfSat01_TFREE.31396918			8784.5	1478
TfSat01	fLG7.TfSat01_TFREE.31407492			1789.5	5438
TfSat01	fLG7.TfSat01_TFREE.31453593			4405.5	1655
TfSat01	fLG7.TfSat01_TFREE.31459839			4268.33	5258
TfSat01	fLG7.TfSat01_TFREE.31460863			5015	5231.5
TfSat01	fLG7.TfSat01_TFREE.31471772			1806	5453.5
TfSat01	fLG7.TfSat01_TFREE.31490869			1808.5	6125.5
TfSat01	fLG7.TfSat01_TFREE.31517592			3638.33	4299.33
TfSat01	fLG7.TfSat01_TFREE.31519020			5343.75	5125.5
TfSat01	fLG7.TfSat01_TFREE.31539844			5040	3962.67
TfSat01	fLG7.TfSat01_TFREE.31541264			4566.67	2930
TfSat01	fLG7.TfSat01_TFREE.31562201			1860	5341
TfSat01	fLG7.TfSat01_TFREE.31564225			2881	9778
TfSat01	fLG7.TfSat01_TFREE.31590661			4108.33	5032.67
TfSat01	fLG7.TfSat01_TFREE.31592088			6442	4097
TfSat01	fLG7.TfSat01_TFREE.31602526			4180.67	5446.33
TfSat01	fLG7.TfSat01_TFREE.31604823			5954	4150.33
TfSat01	fLG7.TfSat01_TFREE.31621869			6032	1941.5
TfSat01	fLG7.TfSat01_TFREE.31628959			1058	8318.5
TfSat01	fLG7.TfSat01_TFREE.31634724			7248	1484
TfSat01	fLG7.TfSat01_TFREE.31642824			4754.25	4421.25
TfSat01	fLG7.TfSat01_TFREE.31665314			5448	1800
TfSat01	fLG7.TfSat01_TFREE.31697695			1940.5	5842.5
TfSat01	fLG7.TfSat01_TFREE.31700289			8602.5	1460.5
TfSat01	fLG7.TfSat01_TFREE.31710689			1797.5	5442.5
TfSat01	fLG7.TfSat01_TFREE.31730766			1788	5104
TfSat01	fLG7.TfSat01_TFREE.31765132			4004.33	4551.67
TfSat01	fLG7.TfSat01_TFREE.31766560			5618.75	5315.25
TfSat01	fLG7.TfSat01_TFREE.31776359			5781	3276.67
TfSat01	fLG7.TfSat01_TFREE.31786436			1788	5402.5
TfSat01	fLG7.TfSat01_TFREE.31806369			99	9556
TfSat01	fLG7.TfSat01_TFREE.31836932			7160	1666
TfSat01	fLG7.TfSat01_TFREE.31845864			4277.67	5312.67
TfSat01	fLG7.TfSat01_TFREE.31846888			6670.67	4282.67
TfSat01	fLG7.TfSat01_TFREE.31857643			1645.5	6129
TfSat01	fLG7.TfSat01_TFREE.31877060			1812	5294.5
TfSat01	fLG7.TfSat01_TFREE.31907036			4593.25	4461.75
TfSat01	fLG7.TfSat01_TFREE.31908464			4593.25	4461.75
TfSat01	fLG7.TfSat01_TFREE.31929330			7721.5	4797.5
TfSat01	fLG7.TfSat01_TFREE.31930758			6293.5	1699.5
TfSat01	fLG7.TfSat01_TFREE.31949235			3977.5	1498
TfSat01	fLG7.TfSat01_TFREE.31955052			1839.5	5321
TfSat01	fLG7.TfSat01_TFREE.31957076			2860	9758
TfSat01	fLG7.TfSat01_TFREE.31984856	5826	2929	1637.5	4283.5	5332.67	3594.17
TfSat01	fLG7.TfSat01_TFREE.31986283	7141.5	3875.5	3064.5	6384.5	3905.67	1493.17
TfSat01	fLG7.TfSat01_TFREE.32007241	3975.43	7521.86	6318.5	1539.5	332	6092
TfSat01	fLG7.TfSat01_TFREE.32014961			1401.5	9018.5
TfSat01	fLG7.TfSat01_TFREE.32020894					9183	759.5
TfSat01	fLG7.TfSat01_TFREE.32039843			4094	1897
TfSat01	fLG7.TfSat01_TFREE.32053004			4445	1798
TfSat01	fLG7.TfSat01_TFREE.32059107					4440	7516
TfSat01	fLG7.TfSat01_TFREE.32071392			3593.5	1464	7845	8891
TfSat01	fLG7.TfSat01_TFREE.32076512			1526.5	4681
TfSat01	fLG7.TfSat01_TFREE.32078537			2876	9789
TfSat01	fLG7.TfSat01_TFREE.32109308			3913.67	4783
TfSat01	fLG7.TfSat01_TFREE.32110571			6300.67	3913
TfSat01	fLG7.TfSat01_TFREE.32120332			1347	8409
TfSat01	fLG7.TfSat01_TFREE.32137058					34	9556
TfSat01	fLG7.TfSat01_TFREE.32145873			4416.5	1765
TfSat01	fLG7.TfSat01_TFREE.32164085			4445	1795
TfSat01	fLG7.TfSat01_TFREE.32170176			1646	7473
TfSat01	fLG7.TfSat01_TFREE.32176276			6858	9896
TfSat01	fLG7.TfSat01_TFREE.32188328			9008	3380
TfSat01	fLG7.TfSat01_TFREE.32192429			5624	1888
TfSat01	fLG7.TfSat01_TFREE.32224409			1637	5116
TfSat01	fLG7.TfSat01_TFREE.32245366			4250.75	4579.75
TfSat01	fLG7.TfSat01_TFREE.32253985			1496.5	6595.5
TfSat01	fLG7.TfSat01_TFREE.32257919			7107	99
TfSat01	fLG7.TfSat01_TFREE.32266878			1852	6022
TfSat01	fLG7.TfSat01_TFREE.32269473			8878	774
TfSat01	fLG7.TfSat01_TFREE.32280578			1509.5	9112
TfSat01	fLG7.TfSat01_TFREE.32286999			5645	1899
TfSat01	fLG7.TfSat01_TFREE.32294132			1488	8062
TfSat01	fLG7.TfSat01_TFREE.32299397			5778	4460.33
TfSat01	fLG7.TfSat01_TFREE.32306578			815	9840
TfSat01	fLG7.TfSat01_TFREE.32314512			7971	1496
TfSat01	fLG7.TfSat01_TFREE.32324303			1820	4968
TfSat01	fLG7.TfSat01_TFREE.32343347			785	9474
TfSat01	fLG7.TfSat01_TFREE.32378911			771	8626
TfSat01	fLG7.TfSat01_TFREE.32385701			5652	1907.5
TfSat01	fLG7.TfSat01_TFREE.32392837			4063	6181.33
TfSat01	fLG7.TfSat01_TFREE.32398102			5125.67	4140.67
TfSat01	fLG7.TfSat01_TFREE.32404294			803	9991
TfSat01	fLG7.TfSat01_TFREE.32412392			9112	761
TfSat01	fLG7.TfSat01_TFREE.32424307			1800	5448
TfSat01	fLG7.TfSat01_TFREE.32479251			6690.5	1652.5
TfSat01	fLG7.TfSat01_TFREE.32487843			5424.25	5447.75
TfSat01	fLG7.TfSat01_TFREE.32488867			5964	3833.33
TfSat01	fLG7.TfSat01_TFREE.32498596			1806	5453
TfSat01	fLG7.TfSat01_TFREE.32517320			1806	5288
TfSat01	fLG7.TfSat01_TFREE.32531158			9701	770
TfSat01	fLG7.TfSat01_TFREE.32543331			1285.5	6393.5
TfSat01	fLG7.TfSat01_TFREE.32546923			9701	770
TfSat01	fLG7.TfSat01_TFREE.32559090			3753	4495
TfSat01	fLG7.TfSat01_TFREE.32560518			5431.25	5273.75
TfSat01	fLG7.TfSat01_TFREE.32581511			5038.33	3960
TfSat01	fLG7.TfSat01_TFREE.32582939			4562.33	2927.33
TfSat01	fLG7.TfSat01_TFREE.32599232			3960.5	1481.5
TfSat01	fLG7.TfSat01_TFREE.32605034			1841.5	5322.5
TfSat01	fLG7.TfSat01_TFREE.32633141			3666.33	4590.67
TfSat01	fLG7.TfSat01_TFREE.32634568			5332.25	5104
TfSat01	fLG7.TfSat01_TFREE.32643570			3510.33	4739
TfSat01	fLG7.TfSat01_TFREE.32644997			5216.25	5216
TfSat01	fLG7.TfSat01_TFREE.32662936			6360	1333
TfSat01	fLG7.TfSat01_TFREE.32693607			1827.5	5310.5
TfSat01	fLG7.TfSat01_TFREE.32723829			1286	4275.5
TfSat01	fLG7.TfSat01_TFREE.32725257			8935	99
TfSat01	fLG7.TfSat01_TFREE.32749298			5181.33	4041.33
TfSat01	fLG7.TfSat01_TFREE.32750726			4705.33	3008.67
TfSat01	fLG7.TfSat01_TFREE.32769030			3973	1493
TfSat01	fLG7.TfSat01_TFREE.32774854			1851	5333
TfSat01	fLG7.TfSat01_TFREE.32776878			2872	9437
TfSat01	fLG7.TfSat01_TFREE.32804321			3952.33	5101.33
TfSat01	fLG7.TfSat01_TFREE.32805748			6368.33	3957
TfSat01	fLG7.TfSat01_TFREE.32815574			1382	8979.5
TfSat01	fLG7.TfSat01_TFREE.32821507					9183	759.5
TfSat01	fLG7.TfSat01_TFREE.32840779			4427.5	1777
TfSat01	fLG7.TfSat01_TFREE.32861263					4440	7349
TfSat01	fLG7.TfSat01_TFREE.32873381			3919	1461.5	7678	8724
TfSat01	fLG7.TfSat01_TFREE.32879151			1851	5333.5
TfSat01	fLG7.TfSat01_TFREE.32881176			2873	9940
TfSat01	fLG7.TfSat01_TFREE.32909783			3845.67	4770.67
TfSat01	fLG7.TfSat01_TFREE.32911210			5396.75	5369.25
TfSat01	fLG7.TfSat01_TFREE.32920635			1702.5	8918.5
TfSat01	fLG7.TfSat01_TFREE.32926569					6008	759.5
TfSat01	fLG7.TfSat01_TFREE.32933022			8982	1758	445	6820.5
TfSat01	fLG7.TfSat01_TFREE.32938504			4387.5	1737	5927	7844.5
TfSat01	fLG7.TfSat01_TFREE.32956668			4447	1796
TfSat01	fLG7.TfSat01_TFREE.32962758			1643	7471
TfSat01	fLG7.TfSat01_TFREE.32968855			6852	9890
TfSat01	fLG7.TfSat01_TFREE.32980582			9023	3395
TfSat01	fLG7.TfSat01_TFREE.32984684			5638.5	1902.5
TfSat01	fLG7.TfSat01_TFREE.33020351			1625	5104
TfSat01	fLG7.TfSat01_TFREE.33037295			4252.25	4582.75
TfSat01	fLG7.TfSat01_TFREE.33045905			1487	7249
TfSat01	fLG7.TfSat01_TFREE.33050502			8540	1058.5
TfSat01	fLG7.TfSat01_TFREE.33060784			1742	5719.5
TfSat01	fLG7.TfSat01_TFREE.33063379			9055	783
TfSat01	fLG7.TfSat01_TFREE.33074664			1512.5	9149
TfSat01	fLG7.TfSat01_TFREE.33081119			5634	1889.5
TfSat01	fLG7.TfSat01_TFREE.33088256			1503	8079.5
TfSat01	fLG7.TfSat01_TFREE.33093524			5743.67	4426
TfSat01	fLG7.TfSat01_TFREE.33112575			8300.5	1493
TfSat01	fLG7.TfSat01_TFREE.33122693			1817.5	4966
TfSat01	fLG7.TfSat01_TFREE.33141741			782	9973
TfSat01	fLG7.TfSat01_TFREE.33149841			9270	99
TfSat01	fLG7.TfSat01_TFREE.33161950			1904.5	6049
TfSat01	fLG7.TfSat01_TFREE.33177506			1521.5	8955
TfSat01	fLG7.TfSat01_TFREE.33183796			5643	1901.5
TfSat01	fLG7.TfSat01_TFREE.33190905			4105	6221.33
TfSat01	fLG7.TfSat01_TFREE.33196170			5229	4186.33
TfSat01	fLG7.TfSat01_TFREE.33210635			9278	761
TfSat01	fLG7.TfSat01_TFREE.33222728			1812	5460
TfSat01	fLG7.TfSat01_TFREE.33259398			6753	1659
TfSat01	fLG7.TfSat01_TFREE.33267995			5064.5	5115.75
TfSat01	fLG7.TfSat01_TFREE.33269019			5064.5	5115.75
TfSat01	fLG7.TfSat01_TFREE.33278086			1806	5453.5
TfSat01	fLG7.TfSat01_TFREE.33297179			1809.5	5292
TfSat01	fLG7.TfSat01_TFREE.33310346					6400	3468
TfSat01	fLG7.TfSat01_TFREE.33324611			3748	4519	7865	9236
TfSat01	fLG7.TfSat01_TFREE.33326039			5315.25	5290.25
TfSat01	fLG7.TfSat01_TFREE.33352488			3915	1452.5
TfSat01	fLG7.TfSat01_TFREE.33358212			1809	5125.5
TfSat01	fLG7.TfSat01_TFREE.33388554			5406.33	4262
TfSat01	fLG7.TfSat01_TFREE.33389982			4930.33	3117.33
TfSat01	fLG7.TfSat01_TFREE.33413758			1776	5259
TfSat01	fLG7.TfSat01_TFREE.33444849			5084	5027.5
TfSat01	fLG7.TfSat01_TFREE.33446276			5084	5027.5
TfSat01	fLG7.TfSat01_TFREE.33455136			1759.5	9196.5
TfSat01	fLG7.TfSat01_TFREE.33461234			6192	1333
TfSat01	fLG7.TfSat01_TFREE.33482478			4439	1444.5
TfSat01	fLG7.TfSat01_TFREE.33501202			2439	545
TfSat01	fLG7.TfSat01_TFREE.33515718			6297.33	2716.33
TfSat01	fLG7.TfSat01_TFREE.33524212			1497.5	7384
TfSat01	fLG7.TfSat01_TFREE.33544335			7590	1851
TfSat01	fLG7.TfSat01_TFREE.33561461			5633.5	1898.5
TfSat01	fLG7.TfSat01_TFREE.33577719			8469.5	1496
TfSat01	fLG7.TfSat01_TFREE.33587989			1800.5	5449
TfSat01	fLG7.TfSat01_TFREE.33641298	1679	7183
TfSat01	fLG7.TfSat01_TFREE.33663742			7861.5	1657.5
TfSat01	fLG7.TfSat01_TFREE.33690801			1818	5465.5
TfSat01	fLG7.TfSat01_TFREE.33710226			1797	5444
TfSat01	fLG7.TfSat01_TFREE.33729664			1815	5297.5
TfSat01	fLG7.TfSat01_TFREE.33754929			9941	831
TfSat01	fLG7.TfSat01_TFREE.33767710			4387	4387
TfSat01	fLG7.TfSat01_TFREE.33769556			4387	4387
TfSat01	fLG7.TfSat01_TFREE.33775970			1391	7347
TfSat01	fLG7.TfSat01_TFREE.33796406			4364.25	4364.25
TfSat01	fLG7.TfSat01_TFREE.33798252			4364.25	4364.25
TfSat01	fLG7.TfSat01_TFREE.33804681			831	9083
TfSat01	fLG7.TfSat01_TFREE.33831419			4416.5	4744.75
TfSat01	fLG7.TfSat01_TFREE.33840368			1493	7255.5
TfSat01	fLG7.TfSat01_TFREE.33844966			7705	1058
TfSat01	fLG7.TfSat01_TFREE.33854413			1742	5719
TfSat01	fLG7.TfSat01_TFREE.33857008			9071	798
TfSat01	fLG7.TfSat01_TFREE.33868297			783	8636
TfSat01	fLG7.TfSat01_TFREE.33875085			5607	1862.5
TfSat01	fLG7.TfSat01_TFREE.33882165			1473	8047.5
TfSat01	fLG7.TfSat01_TFREE.33887431			5770.67	4453
TfSat01	fLG7.TfSat01_TFREE.33894596			803	9828
TfSat01	fLG7.TfSat01_TFREE.33902530			8454	1481
TfSat01	fLG7.TfSat01_TFREE.33912798			1814	4962
TfSat01	fLG7.TfSat01_TFREE.33932018			785	9309
TfSat01	fLG7.TfSat01_TFREE.33952393			1900.5	6212
TfSat01	fLG7.TfSat01_TFREE.33967978			791	8644
TfSat01	fLG7.TfSat01_TFREE.33974766			5655	1910.5
TfSat01	fLG7.TfSat01_TFREE.33981908			3989.67	5997.33
TfSat01	fLG7.TfSat01_TFREE.33986841			5086.67	4046.33
TfSat01	fLG7.TfSat01_TFREE.34004085			9113	761
TfSat01	fLG7.TfSat01_TFREE.34015998			1797	5445.5
TfSat01	fLG7.TfSat01_TFREE.34033973			99	8771
TfSat01	fLG7.TfSat01_TFREE.34060566			6707.5	1669.5
TfSat01	fLG7.TfSat01_TFREE.34069175			4529	5482.33
TfSat01	fLG7.TfSat01_TFREE.34070199			8760	781
TfSat01	fLG7.TfSat01_TFREE.34081765			1803	5116.5
TfSat01	fLG7.TfSat01_TFREE.34104358			1812	5294.5
TfSat01	fLG7.TfSat01_TFREE.34134662			1293	4289.5
TfSat01	fLG7.TfSat01_TFREE.34136090			9931	99
TfSat01	fLG7.TfSat01_TFREE.34160423			3361.5	3172
TfSat01	fLG7.TfSat01_TFREE.34161852			3361.5	3172
TfSat01	fLG7.TfSat01_TFREE.34178967			3966	1487
TfSat01	fLG7.TfSat01_TFREE.34184754			1821	5302
TfSat01	fLG7.TfSat01_TFREE.34186778			3845	9123
TfSat01	fLG7.TfSat01_TFREE.34211865			3992.33	4915.67
TfSat01	fLG7.TfSat01_TFREE.34213288			6458.67	3993.67
TfSat01	fLG7.TfSat01_TFREE.34235364			6857	995
TfSat01	fLG7.TfSat01_TFREE.34253962			3580	814
TfSat01	fLG7.TfSat01_TFREE.34271195			3928	1466
TfSat01	fLG7.TfSat01_TFREE.34276896			1773	5255
TfSat01	fLG7.TfSat01_TFREE.34278921			9663	99
TfSat01	fLG7.TfSat01_TFREE.34303256			3927	1464.5
TfSat01	fLG7.TfSat01_TFREE.34308995			1812	5294.5
TfSat01	fLG7.TfSat01_TFREE.34335982			5426	4225.33
TfSat01	fLG7.TfSat01_TFREE.34337410			4950	3080.33
TfSat01	fLG7.TfSat01_TFREE.34345735			5343.5	5482.5
TfSat01	fLG7.TfSat01_TFREE.34356397			1638.5	4962
TfSat01	fLG7.TfSat01_TFREE.34391668			3611.67	4535.67
TfSat01	fLG7.TfSat01_TFREE.34393095			5251.5	5025
TfSat01	fLG7.TfSat01_TFREE.34401938			99	8786
TfSat01	fLG7.TfSat01_TFREE.34408367			6193	1333
TfSat01	fLG7.TfSat01_TFREE.34433777			4453	1452
TfSat01	fLG7.TfSat01_TFREE.34452244			3923.5	1461
TfSat01	fLG7.TfSat01_TFREE.34457986			5127.25	5127.25
TfSat01	fLG7.TfSat01_TFREE.34460011			5127.25	5127.25
TfSat01	fLG7.TfSat01_TFREE.34468240			1818	5300.5
TfSat01	fLG7.TfSat01_TFREE.34494726			5443.67	4295.33
TfSat01	fLG7.TfSat01_TFREE.34496154			4967.67	3150.67
TfSat01	fLG7.TfSat01_TFREE.34520268			1791.5	5274
TfSat01	fLG7.TfSat01_TFREE.34559901			3709	3557.5
TfSat01	fLG7.TfSat01_TFREE.34577637			5406	1827.5
TfSat01	fLG7.TfSat01_TFREE.34584531			5258.25	5139.25
TfSat01	fLG7.TfSat01_TFREE.34589116			5258.25	5139.25
TfSat01	fLG7.TfSat01_TFREE.34607500			3911.5	1449
TfSat01	fLG7.TfSat01_TFREE.34613218			4621.75	4536.75
TfSat01	fLG7.TfSat01_TFREE.34615243			4621.75	4536.75
TfSat01	fLG7.TfSat01_TFREE.34634919			3911.5	1449
TfSat01	fLG7.TfSat01_TFREE.34640640			1809.5	5292
TfSat01	fLG7.TfSat01_TFREE.34669448			5309.67	4044.33
TfSat01	fLG7.TfSat01_TFREE.34670876			4833.67	2899.67
TfSat01	fLG7.TfSat01_TFREE.34694805			1764	5246
TfSat01	fLG7.TfSat01_TFREE.34710111			7563	1824
TfSat01	fLG7.TfSat01_TFREE.34718448			774	8627
TfSat01	fLG7.TfSat01_TFREE.34725235			6259.33	2678.33
TfSat01	fLG7.TfSat01_TFREE.34733612			1434.5	7653
TfSat01	fLG7.TfSat01_TFREE.34738876			5788.67	4380
TfSat01	fLG7.TfSat01_TFREE.34754823			8449	1480
TfSat01	fLG7.TfSat01_TFREE.34765075			1803	5447
TfSat01	fLG7.TfSat01_TFREE.34808528			6207	786.5
TfSat01	fLG7.TfSat01_TFREE.34835630			1803.5	5451.5
TfSat01	fLG7.TfSat01_TFREE.34850906			1809	5457
TfSat01	fLG7.TfSat01_TFREE.34870656			1812	5294.5
TfSat01	fLG7.TfSat01_TFREE.34895639			9609	831
TfSat01	fLG7.TfSat01_TFREE.34908142			4283.75	4283.5
TfSat01	fLG7.TfSat01_TFREE.34909910			4283.75	4283.5
TfSat01	fLG7.TfSat01_TFREE.34916175			4683.25	4683.75
TfSat01	fLG7.TfSat01_TFREE.34919275			4683.25	4683.75
TfSat01	fLG7.TfSat01_TFREE.34925541			831	8779
TfSat01	fLG7.TfSat01_TFREE.34946628			4358.5	4358.5
[truncated: 5,701 more rows]
