# Supplementary material for: Dynamic evolution of satellite DNAs drastically differentiates the genomes of Tribolium sibling species
Source: HighWire-hosted journal article supplement (doi:10.1101/gr.280516.125), 2025-09-16
Supplement: Supplemental_Tables.zip [file Supplemental_Table_S6.xlsx]

## Sheet: Table S6
Supplemental Table S6. Summary data on the presence of genes, satDNAs and transposable elements (TE) in the 10-kb flanking regions of the T. freemani satDNAs. The summary data are based on the data given for individual arrays in Supplemental Table S5. "Yes" indicates that at least one array has an annotated sequence of interest in its 10-kb surrounding region (left or right), whereas "No" indicat…
SatDNA	gene presence	satDNA presence	TE presence
TfSat01	Yes	Yes	Yes
TfSat02	Yes	Yes	Yes
TfSat03	Yes	Yes	Yes
TfSat04	No	Yes	Yes
TfSat05	Yes	Yes	Yes
TfSat06	Yes	Yes	Yes
TfSat07	Yes	Yes	Yes
TfSat09	Yes	No	Yes
TfSat10	No	No	Yes
TfSat11	Yes	Yes	Yes
TfSat12	Yes	Yes	Yes
TfSat13	Yes	No	Yes
TfSat14	Yes	No	Yes
TfSat15	No	No	Yes
TfSat16	Yes	No	Yes
TfSat17	Yes	No	Yes
TfSat18	Yes	Yes	Yes
TfSat19	Yes	No	Yes
TfSat20	Yes	Yes	Yes
TfSat21	Yes	Yes	Yes
TfSat22	Yes	Yes	Yes
TfSat23	Yes	No	Yes
TfSat24	Yes	No	Yes
TfSat25	Yes	Yes	Yes
TfSat26	No	No	Yes
TfSat27	Yes	No	Yes
TfSat28	No	No	Yes
TfSat30	Yes	No	Yes
TfSat32	Yes	Yes	Yes
TfSat33	No	No	Yes
TfSat34	Yes	No	Yes
TfSat35	Yes	No	Yes
TfSat36	Yes	No	No
TfSat37	Yes	Yes	Yes
TfSat39	Yes	Yes	Yes
TfSat40	Yes	Yes	Yes
TfSat41	Yes	Yes	No
TfSat42	Yes	Yes	Yes
TfSat43	No	No	Yes
TfSat44	No	No	Yes
TfSat45	No	No	Yes
TfSat46	Yes	No	Yes
TfSat47	Yes	No	Yes
TfSat48	No	No	Yes
TfSat49	Yes	No	Yes
TfSat50	Yes	No	Yes
TfSat51	Yes	No	Yes
TfSat52	No	No	Yes
TfSat53	Yes	No	Yes
TfSat54	Yes	Yes	Yes
TfSat55	No	No	Yes
TfSat56	Yes	No	Yes
TfSat57	No	No	Yes
TfSat58	Yes	No	Yes
TfSat59	No	No	Yes
TfSat60	No	No	Yes
TfSat62	Yes	No	No
TfSat63	Yes	No	Yes
TfSat64	No	No	Yes
TfSat65	Yes	No	Yes
TfSat66	No	No	Yes
TfSat67	Yes	No	Yes
TfSat68	Yes	No	Yes
TfSat69	No	No	Yes
TfSat70	Yes	No	Yes
TfSat71	Yes	No	Yes
TfSat72	Yes	No	Yes
TfSat74	Yes	No	Yes
TfSat75	Yes	No	Yes
TfSat76	Yes	No	Yes
TfSat77	Yes	No	Yes
TfSat78	No	Yes	No
TfSat79	Yes	No	Yes
TfSat80	Yes	No	No
TfSat81	Yes	No	Yes
TfSat82	Yes	No	Yes
TfSat83	No	Yes	No
TfSat84	No	No	Yes
TfSat85	Yes	No	No
TfSat86	No	No	Yes
TfSat87	Yes	No	Yes
TfSat88	Yes	No	Yes
TfSat89	Yes	No	Yes
TfSat90	Yes	Yes	Yes
TfSat91	No	No	Yes
TfSat92	Yes	No	Yes
TfSat93	Yes	No	No
TfSat94	Yes	Yes	Yes
TfSat95	No	No	Yes
TfSat96	No	No	Yes
TfSat97	Yes	No	Yes
TfSat99	Yes	No	Yes
TfSat100	Yes	No	No
TfSat101	Yes	No	Yes
TfSat102	Yes	No	Yes
TfSat103	Yes	No	No
TfSat104	Yes	No	Yes
TfSat105	No	No	Yes
TfSat106	Yes	No	Yes
TfSat107	Yes	No	Yes
TfSat108	Yes	No	No
TfSat109	Yes	No	Yes
TfSat110	Yes	No	Yes
TfSat111	Yes	No	Yes
TfSat112	Yes	No	No
TfSat113	No	No	Yes
TfSat114	Yes	No	Yes
TfSat115	Yes	No	Yes
TfSat116	Yes	No	Yes
TfSat117	Yes	No	Yes
TfSat118	Yes	No	No
TfSat119	Yes	No	Yes
TfSat120	No	No	Yes
TfSat121	Yes	No	No
TfSat122	Yes	No	No
TfSat123	Yes	No	Yes
TfSat124	No	No	Yes
TfSat125	Yes	No	Yes
TfSat126	Yes	No	Yes
TfSat128	Yes	No	Yes
TfSat129	Yes	No	Yes
TfSat130	No	No	Yes
TfSat131	Yes	Yes	No
TfSat132	No	No	Yes
TfSat133	No	No	Yes
TfSat134	Yes	No	Yes
TfSat135	Yes	Yes	Yes
