# Supplementary material for: Dynamic evolution of satellite DNAs drastically differentiates the genomes of Tribolium sibling species
Source: HighWire-hosted journal article supplement (doi:10.1101/gr.280516.125), 2025-09-16
Supplement: Supplemental_Tables.zip [file Supplemental_Table_S7.xlsx]

## Sheet: Table S7
Supplemental Table S7. Average distance (mean and median) of genes, satellite DNAs (satDNAs) and transposable elements (TEs) from T. freemani satDNA arrays (with ³5 consecutive monomers) analyzed in their 10-kb flanking regions (left and right). Average distances were calculated based on the data given for individual arrays in Supplemental Table S5.
	mean_distance (in bp)_left	mean_distance (in bp)_right	median_distance (in bp)_left	median_distance (in bp)_right
Genes	4425	4801	4683	4895
SatDNAs	4409	4856	4430	4428
TEs	5025	5043	4894	5226
