# Supplementary material for: Dynamic evolution of satellite DNAs drastically differentiates the genomes of Tribolium sibling species
Source: HighWire-hosted journal article supplement (doi:10.1101/gr.280516.125), 2025-09-16
Supplement: Supplemental_Tables.zip [file Supplemental_Table_S8.xlsx]

## Sheet: Table S8
Supplemental Table S8. Lengths and positions of the TfSat01 multi-megabase regions on individual chromosomes in the Tfree1.0 assembly.
Chromosome	Length (bp)	Position
fLG2	5027950	fLG2: 10,511,699 - 15,539,649
fLG3	4164834	fLG3: 30,613,563 - 34,778,397
fLG5	5856935	fLG5: 922,573 - 6,779,508
fLG6	9749601	fLG6: 3,968,317 - 13,717,918
fLG7	9266079	fLG7: 27,576,175 - 36,842,254
fLG8	4975820	fLG8: 1 - 4,975,821
fLG9- region 1	3775529	fLG9: 7,820,652 - 11,596,181
fLG9- region 2	6604528	fLG9: 25,808,280 - 32,412,808
