# Supplementary material for: Dynamic evolution of satellite DNAs drastically differentiates the genomes of Tribolium sibling species
Source: HighWire-hosted journal article supplement (doi:10.1101/gr.280516.125), 2025-09-16
Supplement: Supplemental_Tables.zip [file Supplemental_Table_S9.xlsx]

## Sheet: Table S9
Supplemental Table S9. The number of the subarrays within a continuous TfSat01 array. The second column indicates the number of TfSat01 arrays annotated in the Tfree1.0 assembly, which contain the number of subarrays specified in the first column.
Number of subarrays	Number of TfSat01 arrays
within a continuous TfSat01 array	in the Tfree1.0 assembly
1	402
2	1793
3	58
4	167
5	9
6	40
7	4
8	17
9	2
10	3
20	1
23	1
