# Supplementary material for: Dynamic evolution of satellite DNAs drastically differentiates the genomes of Tribolium sibling species
Source: HighWire-hosted journal article supplement (doi:10.1101/gr.280516.125), 2025-09-16
Supplement: Supplemental_Tables.zip [file Supplemental_Table_S10.xlsx]

## Sheet: Table S10
Supplemental Table S10. Chromosomal distribution of the six most frequent inversion segments in which TfSat01 monomers change orientation within TfSat01 arrays. The alignments of the sequences belonging to a particular inversion segment type are shown in Supplemental Data S1.
Inversion segment type	Chromosome
26 bp	fLG5, fLG6, fLG7
106 bp	fLG2, fLG3, fLG5, fLG6, fLG7, fLG8, fLG9
132 bp	fLG3, fLG6, fLG7, fLG8
149 bp	fLG2, fLG3, fLG5, fLG6, fLG7
187 bp	fLG3, fLG6, fLG7, fLG8, fLG9
200 bp	fLG2, fLG3, fLG5, fLG6, fLG7, fLG8, fLG9
