# Supplementary material for: Dynamic evolution of satellite DNAs drastically differentiates the genomes of Tribolium sibling species
Source: HighWire-hosted journal article supplement (doi:10.1101/gr.280516.125), 2025-09-16
Supplement: Supplemental_Tables.zip [file Supplemental_Table_S11.xlsx]

## Sheet: Table S11
Supplemental Table S11. Quantitates of 32 genes from the ptg000052L contig and 2000 randomly selected genes from the Tfree1.0 assembly in 24 GB of raw data obtained by PacBio HiFi sequencing of the T. freemani genome. The occurrence of the genes was determined by mapping their sequences against HiFi reads using the minimap2 tool.
	Min.	1st	Median	Mean	3ds	Max
32 genes from ptg000052L contig	1	18	21	27.1	24	114
2000 randomly sampled genes	1	43	54	53.9	65	145
