# Supplementary material for: Dynamic evolution of satellite DNAs drastically differentiates the genomes of Tribolium sibling species
Source: HighWire-hosted journal article supplement (doi:10.1101/gr.280516.125), 2025-09-16
Supplement: Supplemental_Tables.zip [file Supplemental_Table_S12.xlsx]

## Sheet: Table S12
Supplemental Table S12. The sequences of T. freemani specific satDNA primers used in this study. The optimal annealing temperature (Ta) for each primer pair is indicated.
satDNA	primer sequence	Ta
TfSat01	5'-CAAGGGTCGAAACAGTTCCA-3'	56 °C
	5'-CAGGCAATCGATTGAAGTTCAAAA-3'
TfSat03	5'-AACGTTTGCTGGTTTCGAAG-3'	54 °C
	5'-ACAAAAACGGCAAATTTCAGAC-3'
TfSat04	5'-AAGACGTTTTCAGTGAGTTTTATG-3'	65 °C
	5'-GATTTTTGTTACAGTTTGGATGAA-3'
TfSat05	5'-GGCGCATCCACCATTTTTCA-3'	62 °C
	5'-TGTTCCATTGAATTCTGCGG-3'
TfSat06	5'-TGCCTAATCAGATTCTCTTGCAA-3'	57 °C
	5'-TGGCATATCTCAATTTGTTTTGTCAG-3'
TfSat07	5'-TTTCCACCCTGTTCCCAAA-3'	55 °C
	5'-AAAATTCATTAAGGTCCCAAGGG-3'
TfSat08	5'-TCACCCGAAAAACCCTCTGAG-3'	65 °C
	5'-AGGAGTAGGAGCCTTGTCTTCTTTCA-3'
TfSat09	5'-CGGTGTTCCCAAGCAAATT-3'	51 °C
	5'-TTTGCACTTACATTCTAAATATTCT-3'
TfSat10	5'-GTTTTTCAACGATTTCAAGTACT-3'	59 °C
	5'-AAGAGTGAACTACCCTTCCG-3'
