# Supplementary figures and images for: Dynamic evolution of satellite DNAs drastically differentiates the genomes of Tribolium sibling species
Source: HighWire-hosted journal article supplement (doi:10.1101/gr.280516.125), 2025-09-16

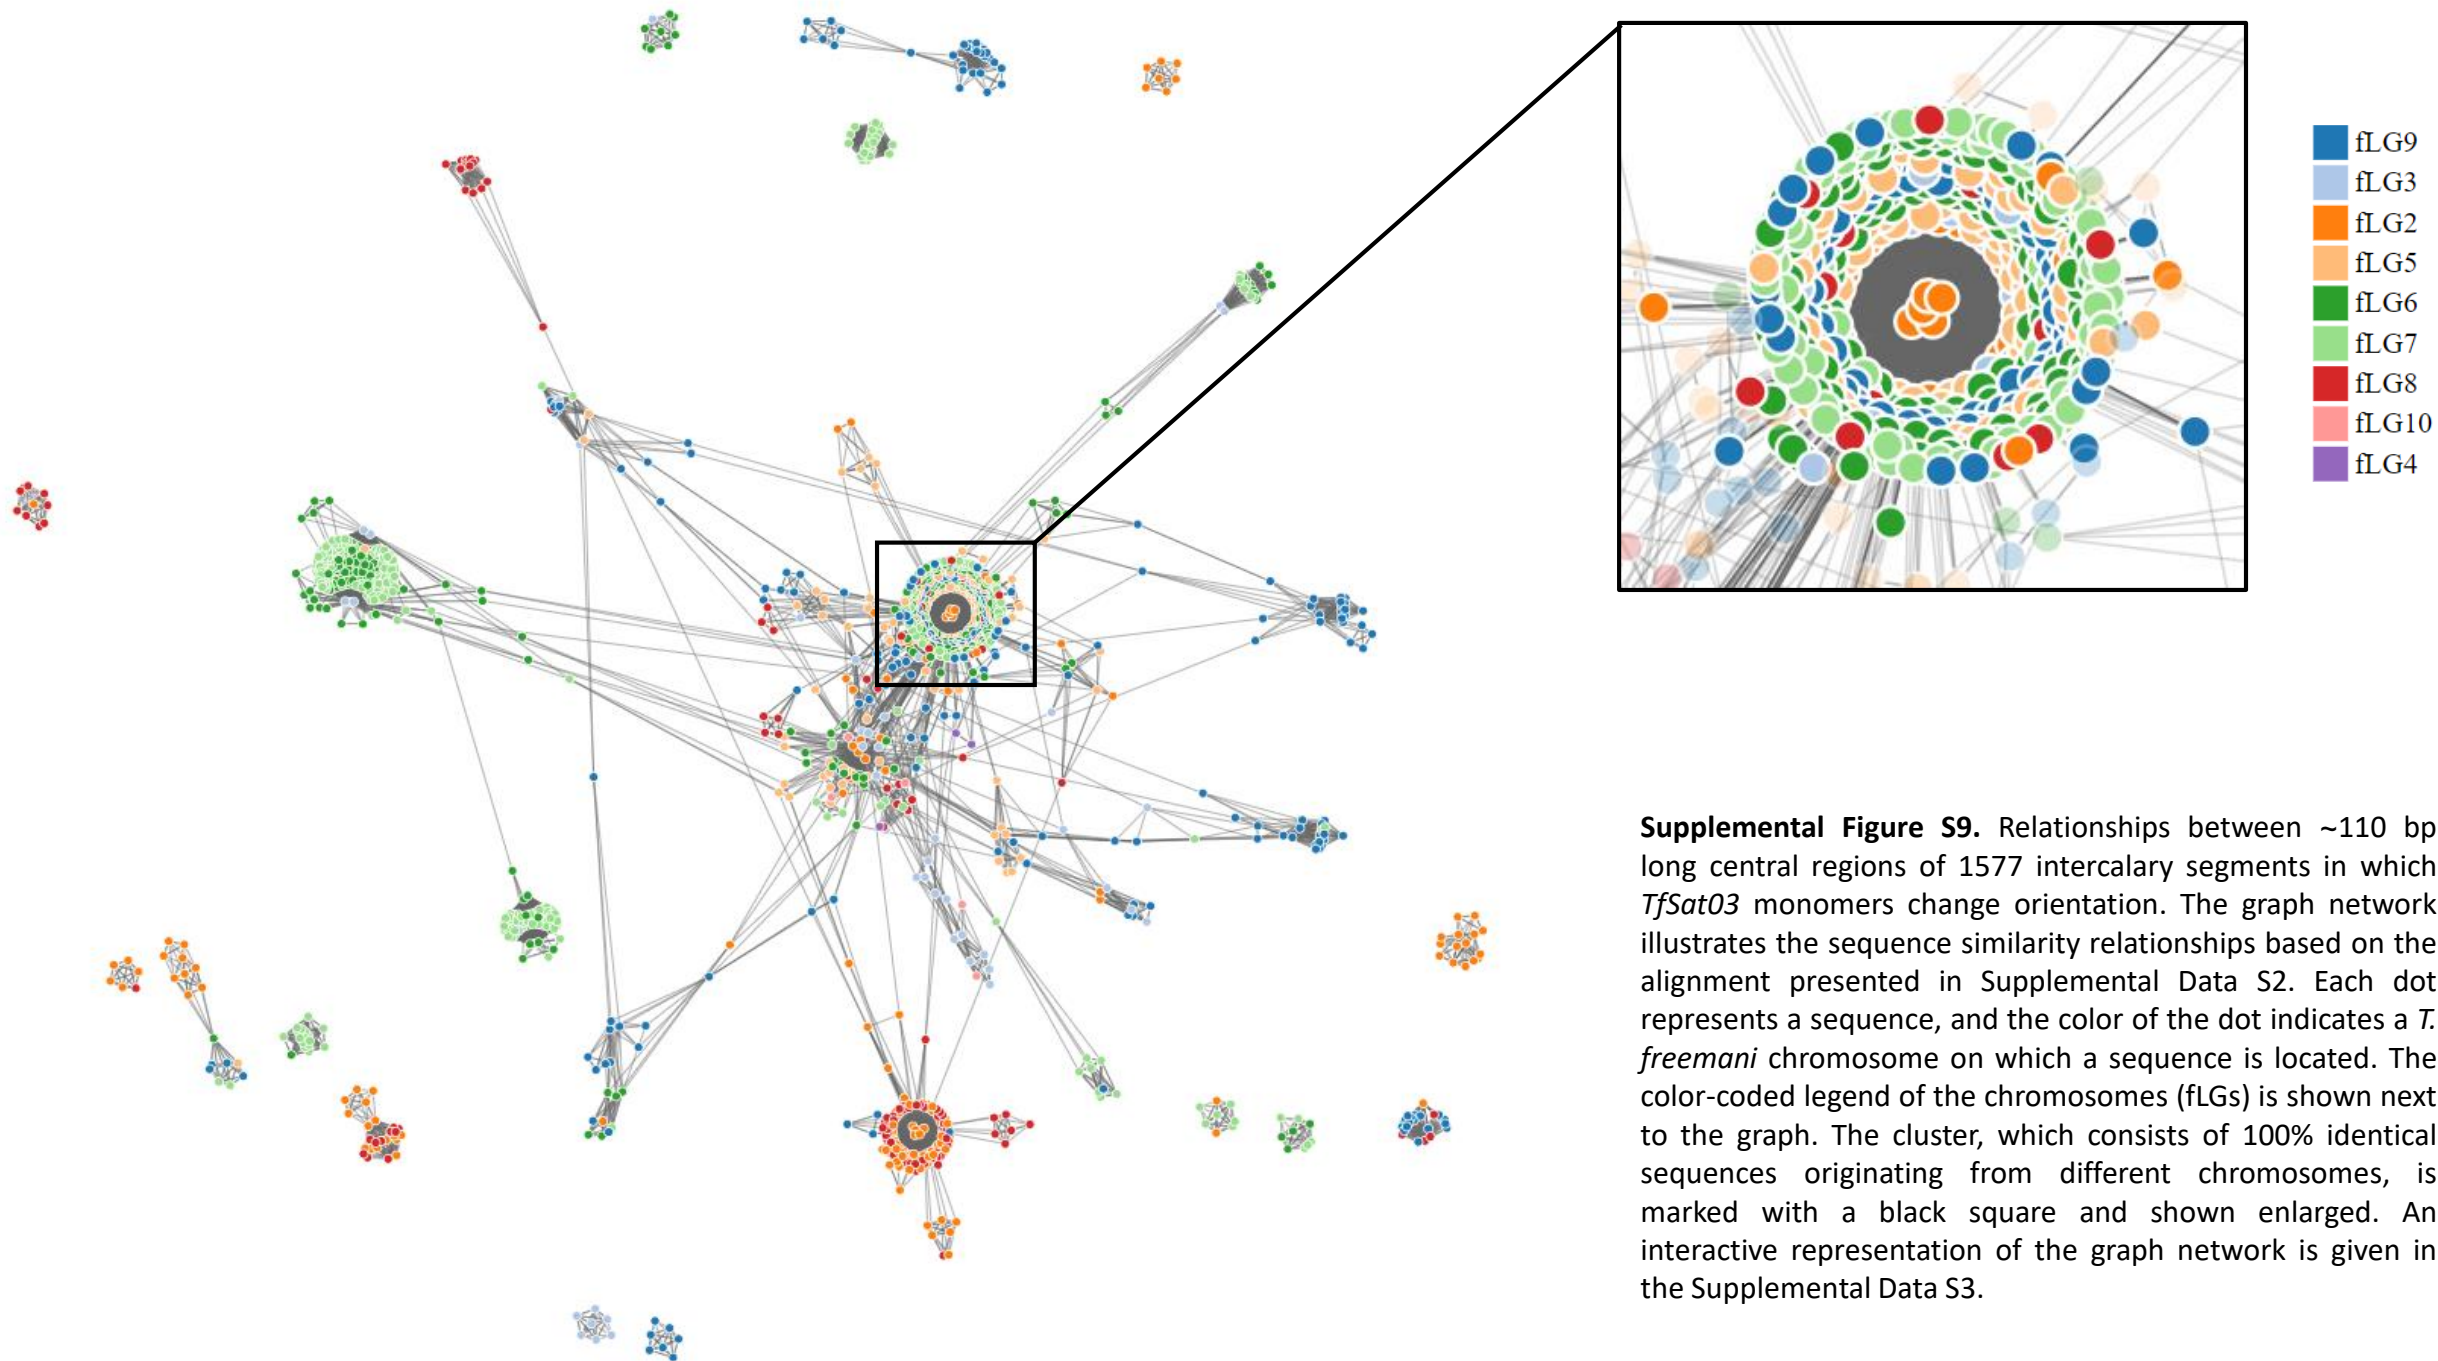

Supplement: Supplemental_Figures.zip [file Supplemental_Fig_S9.pdf › Supplemental_Figures/Supplemental_Figures/Supplemental_Fig_S9.pdf]
